# Supplementary material for: Carbonatite metasomatism overprinted by silicate melt metasomatism in the mantle beneath the West Eifel volcanic field
Source: Copernicus journal article supplement (doi:10.5194/ejm-37-365-2025), 2025-06-30
Supplement: Supplementary file 1 [file ejm-37-365-2025-supplement.zip]

## Sheet: Literature cpx
Sample	Year	Source	details	LOCATION COMMENT	ROCK NAME	ROCK TEXTURE	Type	SiO[2]	TiO[2]	Al[2]O[3]	Cr[2]O[3]	FeO	MnO	MgO	CaO	NiO	K[2]O	Na[2]O	Total	xMg	Ti/Eu	Sc	Ti	V	Cr	Co	Ni	Rb	Sr	Y	Zr	Nb	La	Ce	Pr	Nd	Sm	Eu	Gd	Tb	Dy	Ho	Er	Tm	Yb	Lu	Hf	Ta	Zr/Zr*
samp. D-42	1982	[11509] STOSCH H.-G. (1982)		EUROPEAN OROGENIC BELT - CENOZOIC/QUATERNARY / GERMANY / EIFEL / DREISER WEIHER	PERIDOTITE. SPINEL. XENOLITH		LREE depleted																										2.12	4.85	0.68	3.55	1.18	0.3	1.03	0.147	0.94	0.2		0.086	0.65	0.105
samp. D-45	1982	[11509] STOSCH H.-G. (1982)		EUROPEAN OROGENIC BELT - CENOZOIC/QUATERNARY / GERMANY / EIFEL / DREISER WEIHER	PERIDOTITE. SPINEL. XENOLITH		LREE depleted																										1.64	3.35	0.48	2.35	0.8	0.33	1.41	0.275		0.4		0.215	1.43	0.225
samp. D-50	1982	[11509] STOSCH H.-G. (1982)		EUROPEAN OROGENIC BELT - CENOZOIC/QUATERNARY / GERMANY / EIFEL / DREISER WEIHER	PERIDOTITE. SPINEL. XENOLITH		LREE depleted																										2.65	5.6	0.75	4.1	1.09	0.375	1.2	0.184	1.07	0.225	0.68	0.091	0.63	0.102
samp. IB/24	1982	[11509] STOSCH H.-G. (1982)		EUROPEAN OROGENIC BELT - CENOZOIC/QUATERNARY / GERMANY / EIFEL / DREISER WEIHER	PERIDOTITE. SPINEL. XENOLITH		LREE depleted																										2.12	5.7	0.71	4.3	0.93	0.31	0.94	0.163	1.01	0.27		0.113	0.77	0.117
samp. IB/5	1982	[11509] STOSCH H.-G. (1982)		EUROPEAN OROGENIC BELT - CENOZOIC/QUATERNARY / GERMANY / EIFEL / DREISER WEIHER	PERIDOTITE. SPINEL. XENOLITH		LREE depleted																										0.63	2.2			0.75	0.31	1.45	0.28	2.4	0.57	1.62		1.4	0.23
samp. IB/8	1982	[11509] STOSCH H.-G. (1982)		EUROPEAN OROGENIC BELT - CENOZOIC/QUATERNARY / GERMANY / EIFEL / DREISER WEIHER	PERIDOTITE. SPINEL. XENOLITH		LREE depleted																										1.81	6.2		6.2	2.05	0.72	2.6	0.51				0.3	1.85	0.25
samp. MM1260	2005	[13652] WITT-EICKSCHEN G.(2005) [GeoReM [1802] ]		EUROPEAN OROGENIC BELT - CENOZOIC/QUATERNARY / GERMANY / EIFEL / MEERFELDER MAAR	MANTLE XENOLITH	LHERZOLITE, SPINEL, XENOLITH	LREE depleted	52.08	0.12	4.61	1.55	3.24	0.1	18.41	18.49			0.66	99.26	91.0157	4432.93	36.5	727	161	10634	33.5	542		16.1	5.38	2.54	0.121	0.219	0.749		0.854	0.37	0.164	0.635		0.862	0.187	0.546		0.484	0.073	0.119	0.004	0.312102
samp. MM1240	2005	[13652] WITT-EICKSCHEN G.(2005) [GeoReM [1802] ]		EUROPEAN OROGENIC BELT - CENOZOIC/QUATERNARY / GERMANY / EIFEL / MEERFELDER MAAR	MANTLE XENOLITH	LHERZOLITE, SPINEL, XENOLITH	LREE depleted	53.55	0.15	4.33	1.63	3.11	0.1	18.77	18.68			0.72	101.04	91.4968	3933.92	38	893	167	11160	33.1	548		37.1	3.47	6.44	0.164	0.726	2.644		2.411	0.689	0.227	0.677		0.595	0.123	0.363		0.329	0.048	0.195	0.011	0.345121
samp. IB/2	1980	[8360] STOSCH H.-G. (1980)	NO AMPHIBOLE AND GLASS	EUROPEAN OROGENIC BELT - CENOZOIC/QUATERNARY / GERMANY / EIFEL / DREISER WEIHER	MANTLE XENOLITH	PERIDOTITE, SPINEL, XENOLITH	LREE depleted												0														3.65	8.6	1.32	6.1	2.05	0.75		0.3	2.2		1.5		1.04	0.155
samp. IB/5	1980	[8360] STOSCH H.-G. (1980)	NO AMPHIBOLE AND GLASS	EUROPEAN OROGENIC BELT - CENOZOIC/QUATERNARY / GERMANY / EIFEL / DREISER WEIHER	MANTLE XENOLITH	PERIDOTITE, SPINEL, XENOLITH	LREE depleted												0														0.63	2.2			0.75	0.31	1.45	0.28	2.4	0.57	1.62		1.4	0.23
samp. IB/K1	1980	[8360] STOSCH H.-G. (1980)	NO AMPHIBOLE AND GLASS	EUROPEAN OROGENIC BELT - CENOZOIC/QUATERNARY / GERMANY / EIFEL / DREISER WEIHER	MANTLE XENOLITH	PERIDOTITE, SPINEL, XENOLITH	LREE depleted												0														1.32	5.1	0.92	5.1	2.13	0.8	2.9	0.5	3.3	0.84		0.3	2.13	0.32
samp. D-58	1980	[8360] STOSCH H.-G. (1980)		EUROPEAN OROGENIC BELT - CENOZOIC/QUATERNARY / GERMANY / EIFEL / DREISER WEIHER	PERIDOTITE. SPINEL. XENOLITH		LREE depleted																										1.61	4.4	0.68	4.3	1.56	0.67	2.45	0.44	2.9	0.56		0.27	1.8	0.27
samp. IB/3	1980	[8360] STOSCH H.-G. (1980)		EUROPEAN OROGENIC BELT - CENOZOIC/QUATERNARY / GERMANY / EIFEL / DREISER WEIHER	PERIDOTITE. SPINEL. XENOLITH		LREE depleted																										4.6	11.4	1.44	5.4	0.86	0.28	0.85	0.145	1.03	0.26		0.112	0.76	0.123
samp. IB/6	1980	[8360] STOSCH H.-G. (1980)		EUROPEAN OROGENIC BELT - CENOZOIC/QUATERNARY / GERMANY / EIFEL / DREISER WEIHER	PERIDOTITE. SPINEL. XENOLITH		LREE depleted																										1.62	6.3	1.13	6	2	0.78		0.44		0.62	1.71		1.39	0.23
samp. IB/8	1980	[8360] STOSCH H.-G. (1980)		EUROPEAN OROGENIC BELT - CENOZOIC/QUATERNARY / GERMANY / EIFEL / DREISER WEIHER	PERIDOTITE. SPINEL. XENOLITH		LREE depleted																										1.81	6.2		6.2	2.05	0.72	2.6	0.51				0.3	1.85	0.25
samp. IB/K1	1980	[8360] STOSCH H.-G. (1980)		EUROPEAN OROGENIC BELT - CENOZOIC/QUATERNARY / GERMANY / EIFEL / DREISER WEIHER	PERIDOTITE. SPINEL. XENOLITH		LREE depleted																										1.32	5.1	0.92	5.1	2.13	0.8	2.9	0.5	3.3	0.84		0.3	2.13	0.32
samp. DW211	2005	[13652] WITT-EICKSCHEN G.(2005) [GeoReM [1802] ]		EUROPEAN OROGENIC BELT - CENOZOIC/QUATERNARY / GERMANY / EIFEL / DREISER WEIHER	MANTLE XENOLITH	LHERZOLITE, SPINEL, XENOLITH	Type 1a	53.57	0.04	2.85	1.16	2.37	0.07	16.35	20.99			1.24	98.64	92.481	115.057	73.8	243	206	7947	20.8	348		581.5	13.61	25.33	0.824	32.746	83.576		43.266	7.405	2.112	4.748		2.897	0.494	1.253		1.05	0.151	0.2	0.081	0.0977445
samp. MM110	2005	[13652] WITT-EICKSCHEN G.(2005) [GeoReM [1802] ]		EUROPEAN OROGENIC BELT - CENOZOIC/QUATERNARY / GERMANY / EIFEL / MEERFELDER MAAR	MANTLE XENOLITH	LHERZOLITE, SPINEL, XENOLITH	Type 1a	52.84	0.09	4.34	1.49	2.6	0.1	15.79	19.98			1.59	98.82	91.5452	239.002	61	565	187	10168	21.3	353		315.9	20.18	51.55	1.444	22.081	68.519		42.661	8.485	2.364	6.271		4.134	0.715	1.85		1.46	0.205	0.957	0.139	0.187146
samp. MM766	2005	[13652] WITT-EICKSCHEN G.(2005) [GeoReM [1802] ]		EUROPEAN OROGENIC BELT - CENOZOIC/QUATERNARY / GERMANY / EIFEL / MEERFELDER MAAR	MANTLE XENOLITH	LHERZOLITE, SPINEL, XENOLITH	Type 1a	53.22	0.07	4.34	0.76	2.55	0.09	16.63	20.85			1.1	99.61	92.0806	592.857	68.5	415	192	5217	24.8	425		275.3	8.9	12.24	1.072	18.489	54.224		19.318	2.509	0.7	1.868		1.579	0.311	0.894		0.832	0.125	0.156	0.115	0.121435
samp. DW 1284	2005	[13652] WITT-EICKSCHEN G.(2005) [GeoReM [1802] ]		EUROPEAN OROGENIC BELT - CENOZOIC/QUATERNARY / GERMANY / EIFEL / DREISER WEIHER	MANTLE XENOLITH	LHERZOLITE, SPINEL, XENOLITH	Type 1a	52.96	0.04	3.75	0.73	2.51	0.08	16.59	22.12			0.88	99.66	92.1777	302.071	70.9	248	124	4997	22.4	375		327.6	7.26	9.38	1.585	19.649	54.939		26.49	3.222	0.821	1.709		1.17	0.243	0.744		0.766	0.119	0.144	0.209	0.0701281
samp. MM1278	2005	[13652] WITT-EICKSCHEN G.(2005) [GeoReM [1802] ]		EUROPEAN OROGENIC BELT - CENOZOIC/QUATERNARY / GERMANY / EIFEL / MEERFELDER MAAR	MANTLE XENOLITH	LHERZOLITE, SPINEL, XENOLITH	Type 1a	53.18	0.06	3.73	0.59	2.62	0.07	16.96	21.91			0.74	99.86	92.0262	928.934	67.9	366	200	4016	20.3	325		200.1	8.09	13.14	0.528	20.91	39.852		11.3	1.472	0.394	1.185		1.285	0.296	0.913		0.926	0.135	0.18	0.136	0.222534
samp. DW210	2005	[13652] WITT-EICKSCHEN G.(2005) [GeoReM [1802] ]		EUROPEAN OROGENIC BELT - CENOZOIC/QUATERNARY / GERMANY / EIFEL / DREISER WEIHER	MANTLE XENOLITH	LHERZOLITE, SPINEL, XENOLITH	Type 1a	53.55	0.06	3.82	0.75	2.39	0.08	16.45	22.17			0.92	100.19	92.4649	876.147	67.7	382	209	5129	21.9	368		176.3	8.3	7.01	0.655	15.443	31.703		10.537	1.517	0.436	1.223		1.298	0.286	0.889		0.883	0.136	0.07	0.066	0.121104
samp. 98KY07	2005	[13677] SHAW C. S. J. (2005)		EUROPEAN OROGENIC BELT - CENOZOIC/QUATERNARY / GERMANY / EIFEL / ROCKESKYLLERKOPF VOLCANIC COMPLEX	MANTLE XENOLITH	WEHRLITE, XENOLITH	Type 1a	51.96	0.15	1.58	1.01	2.99	0.09	17.11	22.34			1.02	98.25	91.0733	1405.08		899.25					0.15	146	6.11	7.6	0.38	5.94	23.36	3.2	13.14	2.25	0.64	1.5	0.2	1.07	0.2	0.66	0.07	0.53	0.07	0.31	0.01	0.0965423
samp. 167l	2018	[22049] SHAW C. S. J. (2018)		EUROPEAN OROGENIC BELT - CENOZOIC/QUATERNARY / GERMANY / EIFEL / ROCKESKYLLERKOPF VOLCANIC COMPLEX	WEHRLITE. PHLOGOPITE. XENOLITH		Type 1a												0		1246.73	67.4	2481	200	149		278.6		210	19.03	67.59	1.56	10.41	34.67		33.2	7.31	1.99		0.85	4.56	0.73	1.81	0.22	1.31	0.18	2.08		0.299673
samp. 167l	2018	[22049] SHAW C. S. J. (2018)		EUROPEAN OROGENIC BELT - CENOZOIC/QUATERNARY / GERMANY / EIFEL / ROCKESKYLLERKOPF VOLCANIC COMPLEX	WEHRLITE. PHLOGOPITE. XENOLITH		Type 1a												0		1156.47	65.1	2683	187	103		373.5		236	20.47	111.6	1.03	12.02	39.62		38.35	8.21	2.32		0.97	5.07	0.81	1.94	0.24	1.44	0.18	4		0.434413
samp. 168B	2018	[22049] SHAW C. S. J. (2018)	VEINED	EUROPEAN OROGENIC BELT - CENOZOIC/QUATERNARY / GERMANY / EIFEL / ROCKESKYLLERKOPF VOLCANIC COMPLEX	MANTLE XENOLITH	WEHRLITE, PHLOGOPITE-AMPHIBOLE, XENOLITH	Type 1a												0		924.548	67.4	3578	215	2365		297.3		286	34.28	181.92	1.71	21.48	60.92		69.82	14.01	3.87		1.41	8.15	1.4	3.36	0.44	2.45	0.36	5.31		0.401758
samp. 201B	2018	[22049] SHAW C. S. J. (2018)		EUROPEAN OROGENIC BELT - CENOZOIC/QUATERNARY / GERMANY / EIFEL / ROCKESKYLLERKOPF VOLCANIC COMPLEX	MANTLE XENOLITH	LHERZOLITE, AMPHIBOLE-PHLOGOPITE, XENOLITH	Type 1a												0		45.6446	51.7	131	120	55		222.4		377	23.85	15.93	1.02	23.65	71.35		51.2	10.03	2.87		1.09	5.9	0.93	2.33	0.32	2.01	0.29	0.09		0.0485538
samp. 201B	2018	[22049] SHAW C. S. J. (2018)		EUROPEAN OROGENIC BELT - CENOZOIC/QUATERNARY / GERMANY / EIFEL / ROCKESKYLLERKOPF VOLCANIC COMPLEX	MANTLE XENOLITH	LHERZOLITE, AMPHIBOLE-PHLOGOPITE, XENOLITH	Type 1a												0		55.848	59.9	191	166	627		204.7		397	30.32	37.81	0.78	25.35	89.72		63.33	11.8	3.42		1.33	7.43	1.2	3.15	0.42	2.82	0.4	0.48		0.0955332
samp. 207B	2018	[22049] SHAW C. S. J. (2018)		EUROPEAN OROGENIC BELT - CENOZOIC/QUATERNARY / GERMANY / EIFEL / ROCKESKYLLERKOPF VOLCANIC COMPLEX	WEHRLITE. PHLOGOPITE-AMPHIBOLE. XENOLITH		Type 1a												0		1267.92	67.5	1344	221	156		310.2		184	13.72	12.52	0.51	8.32	25.5		19.31	3.51	1.06		0.48	2.92	0.52	1.38	0.2	1.37	0.19	0.38		0.10504
samp. 215C	2018	[22049] SHAW C. S. J. (2018)		EUROPEAN OROGENIC BELT - CENOZOIC/QUATERNARY / GERMANY / EIFEL / ROCKESKYLLERKOPF VOLCANIC COMPLEX	MANTLE XENOLITH	LHERZOLITE, AMPHIBOLE, XENOLITH	Type 1a												0		160.902	46.7	214	125	4741		292.3		308		35.4	0.94	20.77	50.78		27.71	5.14	1.33		0.44	2.31	0.4	0.98	0.13	0.91	0.12	0.41		0.204879
samp. 27E	2018	[22049] SHAW C. S. J. (2018)		EUROPEAN OROGENIC BELT - CENOZOIC/QUATERNARY / GERMANY / EIFEL / ROCKESKYLLERKOPF VOLCANIC COMPLEX	MANTLE XENOLITH	LHERZOLITE, AMPHIBOLE, XENOLITH	Type 1a												0		46.875	31.5	150	101	4413		173.8		288		27.3	1.58	21.4	73		54	10.9	3.2		1.1	6.24	1.11	2.77	0.38	2.57	0.38	0.52		0.0777223
samp. 27E	2018	[22049] SHAW C. S. J. (2018)		EUROPEAN OROGENIC BELT - CENOZOIC/QUATERNARY / GERMANY / EIFEL / ROCKESKYLLERKOPF VOLCANIC COMPLEX	MANTLE XENOLITH	LHERZOLITE, AMPHIBOLE, XENOLITH	Type 1a												0		54.3943	47.4	229	149	5430		172.8		310		69.2	1.24	26.3	93.4		70.4	14.37	4.21		1.48	8.05	1.5	3.77	0.52	3.66	0.49	0.85		0.150274
samp. 28A	2018	[22049] SHAW C. S. J. (2018)		EUROPEAN OROGENIC BELT - CENOZOIC/QUATERNARY / GERMANY / EIFEL / ROCKESKYLLERKOPF VOLCANIC COMPLEX	MANTLE XENOLITH	LHERZOLITE, AMPHIBOLE-PHLOGOPITE, XENOLITH	Type 1a												0		85.2332	60.1	329	150	93		192.2		437	38.96	248.28	2.05	20.26	64.83		64.19	13.84	3.86		1.81	9.77	1.54	4.04	0.54	3.45	0.5	4.27		0.575351
samp. 28E	2018	[22049] SHAW C. S. J. (2018)		EUROPEAN OROGENIC BELT - CENOZOIC/QUATERNARY / GERMANY / EIFEL / ROCKESKYLLERKOPF VOLCANIC COMPLEX	MANTLE XENOLITH	HARZBURGITE, AMPHIBOLE-PHLOGOPITE, XENOLITH	Type 1a												0		56.8966	18.1	165	76	1367		1048.2		221	31.98	46.77	3.69	17.74	50.67		46.01	9.6	2.9		1.19	6.15	0.95	2.88	0.3	2.17	0.34	0.39		0.153709
samp. 42C	2018	[22049] SHAW C. S. J. (2018)		EUROPEAN OROGENIC BELT - CENOZOIC/QUATERNARY / GERMANY / EIFEL / ROCKESKYLLERKOPF VOLCANIC COMPLEX	MANTLE XENOLITH	WEHRLITE, PHLOGOPITE, XENOLITH	Type 1a												0		569.281	87.3	871	244	66		297.1		213	17.8	30.22	0.85	14.04	44.39		31.73	5.34	1.53		0.65	3.82	0.66	1.77	0.26	1.7	0.23	0.85		0.160355
samp. 42C	2018	[22049] SHAW C. S. J. (2018)		EUROPEAN OROGENIC BELT - CENOZOIC/QUATERNARY / GERMANY / EIFEL / ROCKESKYLLERKOPF VOLCANIC COMPLEX	MANTLE XENOLITH	WEHRLITE, PHLOGOPITE, XENOLITH	Type 1a												0		718.857	94.3	1258	264	71		293.5		233	20.28	35.2	2.43	17.4	46.81		34.96	6.07	1.75		0.76	4.32	0.76	2	0.28	1.83	0.25	0.97		0.1669
samp. 45A	2018	[22049] SHAW C. S. J. (2018)		EUROPEAN OROGENIC BELT - CENOZOIC/QUATERNARY / GERMANY / EIFEL / ROCKESKYLLERKOPF VOLCANIC COMPLEX	DUNITE. PHLOGOPITE-AMPHIBOLE. XENOLITH		Type 1a												0		745.89	39.7	2178	211	113		289		303	25.68	278.34	1.17	11.78	47.46		49.11	10.42	2.92		1.23	6.64	0.93	2.36	0.31	1.97	0.25	7.04		0.849865
samp. 49C	2018	[22049] SHAW C. S. J. (2018)		EUROPEAN OROGENIC BELT - CENOZOIC/QUATERNARY / GERMANY / EIFEL / ROCKESKYLLERKOPF VOLCANIC COMPLEX	MANTLE XENOLITH	HARZBURGITE, AMPHIBOLE, XENOLITH	Type 1a												0		1697.22	70	611	472	104		44.3		125	5.86	9.5	0.3	5.29	11.03		6.76	1.15	0.36		0.2	1.23	0.24	0.69	0.1	0.69	0.1	0.2		0.235339
samp. 52C	2018	[22049] SHAW C. S. J. (2018)		EUROPEAN OROGENIC BELT - CENOZOIC/QUATERNARY / GERMANY / EIFEL / ROCKESKYLLERKOPF VOLCANIC COMPLEX	HARZBURGITE. AMPHIBOLE. XENOLITH		Type 1a												0		142.023	65.1	730	250	3701		292.3		335	38.86	125.73	1.36	54.06	168.46		125.25	19.76	5.14		2.17	7.57	1.5	4.09	0.51	2.77	0.46	4.38		0.174562
samp. 166C	2018	[22049] SHAW C. S. J. (2018)		EUROPEAN OROGENIC BELT - CENOZOIC/QUATERNARY / GERMANY / EIFEL / ROCKESKYLLERKOPF VOLCANIC COMPLEX	MANTLE XENOLITH	HARZBURGITE, AMPHIBOLE-PHLOGOPITE, XENOLITH	Type 1a	52.29	0.18	3.49	1.76	2.23	0.06	16.15	22.02		0.10791	0.86	99.1479	92.8119	21.2254	66.9	97	135	9		232.3		529	44.19	117.64	1.17	35.12	105.3		87.84	16.75	4.57		1.92	10.56	1.7	4.36	0.63	3.93	0.55	1.13		0.211833
samp. 198B	2018	[22049] SHAW C. S. J. (2018)		EUROPEAN OROGENIC BELT - CENOZOIC/QUATERNARY / GERMANY / EIFEL / ROCKESKYLLERKOPF VOLCANIC COMPLEX	MANTLE XENOLITH	WEHRLITE, PHLOGOPITE, XENOLITH	Type 1a	52.57	0.48	3.38	1.15	3.28	0.12	17.13	20.26			0.97	99.34	90.3018	506.377	38.1	1747	219	127		377.5		199	29.27	80.5	2.17	7.02	35.84		50.43	11.59	3.45		1.55	8.02	1.18	2.8	0.37	2.33	0.31	2.88		0.229987
samp. 28E	2018	[22049] SHAW C. S. J. (2018)		EUROPEAN OROGENIC BELT - CENOZOIC/QUATERNARY / GERMANY / EIFEL / ROCKESKYLLERKOPF VOLCANIC COMPLEX	MANTLE XENOLITH	HARZBURGITE, AMPHIBOLE-PHLOGOPITE, XENOLITH	Type 1a	54.17	0.06	1.37	0.53	2.83	0.08	17.26	21.84			1.25	99.39	91.578	28.6127	30.5	99	87	1528		1162.1		280	30.6	12.93	1.74	23.47	85.14		65.62	12.37	3.46		1.46	7.74	1.27	3.29	0.46	2.76	0.42	0.07		0.0313465
samp. 168B	2018	[22049] SHAW C. S. J. (2018)	VEINED	EUROPEAN OROGENIC BELT - CENOZOIC/QUATERNARY / GERMANY / EIFEL / ROCKESKYLLERKOPF VOLCANIC COMPLEX	MANTLE XENOLITH	WEHRLITE, PHLOGOPITE-AMPHIBOLE, XENOLITH	Type 1a	53.69	0.05	2.59	1.74	3.05	0.11	17.85	19.28			1.14	99.5	91.2543	808.073	102.5	3103	263	9601		315.7		340	29.75	130.48	2.27	23.03	66.84		68.66	13.55	3.84		1.36	6.97	1.29	3.11	0.43	2.25	0.33	3.64		0.295471
samp. 198B	2018	[22049] SHAW C. S. J. (2018)		EUROPEAN OROGENIC BELT - CENOZOIC/QUATERNARY / GERMANY / EIFEL / ROCKESKYLLERKOPF VOLCANIC COMPLEX	MANTLE XENOLITH	WEHRLITE, PHLOGOPITE, XENOLITH	Type 1a	53.44	0.16	2.86	1.37	3.35	0.13	17.42	19.69			1.15	99.57	90.2638	317.553	52.3	1194	207	156		362.2		231	30.92	89.48	1.2	8.79	40.66		57.73	13.39	3.76		1.8	8.37	1.22	3.01	0.39	2.51	0.33	2.81		0.222294
samp. 207B	2018	[22049] SHAW C. S. J. (2018)		EUROPEAN OROGENIC BELT - CENOZOIC/QUATERNARY / GERMANY / EIFEL / ROCKESKYLLERKOPF VOLCANIC COMPLEX	MANTLE XENOLITH	WEHRLITE, PHLOGOPITE-AMPHIBOLE, XENOLITH	Type 1a	53.49	0.3	2.56	1.4	3.03	0.11	17.41	20.55			0.98	99.83	91.1065	1209.93	71.8	1706	203	95		281.6		222	15.65	36.49	1.84	11.27	30.37		25.42	4.75	1.41		0.63	3.56	0.6	1.6	0.22	1.42	0.19	1.01		0.229368
samp. 45A	2018	[22049] SHAW C. S. J. (2018)		EUROPEAN OROGENIC BELT - CENOZOIC/QUATERNARY / GERMANY / EIFEL / ROCKESKYLLERKOPF VOLCANIC COMPLEX	MANTLE XENOLITH	DUNITE, PHLOGOPITE-AMPHIBOLE, XENOLITH	Type 1a	51.9	0.74	3.97	0.8	3.43	0.11	15.56	22.87			0.82	100.2	88.9964	219.13	107.5	756	188	4017		354.6		552		126.9	0.52	26.81	86.4		64.3	11.77	3.45		1.1	5.98	1.04	2.38	0.28	1.79	0.21	1.72		0.318611
samp. 28A	2018	[22049] SHAW C. S. J. (2018)		EUROPEAN OROGENIC BELT - CENOZOIC/QUATERNARY / GERMANY / EIFEL / ROCKESKYLLERKOPF VOLCANIC COMPLEX	MANTLE XENOLITH	LHERZOLITE, AMPHIBOLE-PHLOGOPITE, XENOLITH	Type 1a	54.26	0.16	3.14	0.62	2.21	0.08	16.4	23.05			1	100.92	92.9728	55.8376	70.1	220	147	88		166		289	41.28	196.59	1.36	19.11	65.3		65	14.17	3.94		1.81	9.85	1.62	4.13	0.56	3.55	0.5	3.26		0.447418
samp. MM329	1998	[8052] WITT-EICKSCHEN G. (1998)	COMPOSITE MANTLE XENOLITH	EUROPEAN OROGENIC BELT - CENOZOIC/QUATERNARY / GERMANY / EIFEL / MEERFELDER MAAR	MANTLE XENOLITH	PERIDOTITE, XENOLITH	Type 1a	52.69	0.32	5.41	1.08	2.95	0.12	15.8	19.67			1.36	99.4	90.5204	1262.11		1918.4						167	11.2	42.3	0.53	10.6	40	6.65	30.1	4.94	1.52	4.01	0.47	2.66	0.54	1.4		1.74	0.19	0.78		0.2396
samp. MM326	1998	[8052] WITT-EICKSCHEN G. (1998)	COMPOSITE MANTLE XENOLITH	EUROPEAN OROGENIC BELT - CENOZOIC/QUATERNARY / GERMANY / EIFEL / MEERFELDER MAAR	MANTLE XENOLITH	PERIDOTITE, XENOLITH	Type 1a	52.85	0.18	3.8	0.86	3.62	0.24	15.99	20.65			1.25	99.44	88.7326	891.818		1079.1						192	9.74	61.4	0.53	9.98	34.7	5.4	23.8	4.36	1.21	2.56	0.38	2.13	0.37	1.05		0.98	0.1			0.416322
samp. MM313	1998	[8052] WITT-EICKSCHEN G. (1998)	COMPOSITE MANTLE XENOLITH	EUROPEAN OROGENIC BELT - CENOZOIC/QUATERNARY / GERMANY / EIFEL / MEERFELDER MAAR	MANTLE XENOLITH	PERIDOTITE, XENOLITH	Type 1a	53.04	0.26	3.76	1.36	3.07	0.11	16.58	20.06			1.29	99.53	90.5915	1074.97		1558.7						166	11.5	40	1.03	10.5	38.6	6.1	26.1	5.42	1.45	3.68	0.62	3.17	0.54	1.37		1.1	0.13	0.93		0.232291
samp. MM251	1998	[8052] WITT-EICKSCHEN G. (1998)	COMPOSITE MANTLE XENOLITH	EUROPEAN OROGENIC BELT - CENOZOIC/QUATERNARY / GERMANY / EIFEL / MEERFELDER MAAR	MANTLE XENOLITH	PERIDOTITE, XENOLITH	Type 1a	53.73	0.11	2.84	0.82	2.87	0.02	17.07	21.35			0.82	99.63	91.3823	578.465		659.45						199	10.7	127	1.27	23	46.6	5.3	20.7	3.59	1.14	3	0.43	2.67	0.5	1.38		0.98	0.2	1.6		1.01757
samp. MM310	1998	[8052] WITT-EICKSCHEN G. (1998)	COMPOSITE MANTLE XENOLITH	EUROPEAN OROGENIC BELT - CENOZOIC/QUATERNARY / GERMANY / EIFEL / MEERFELDER MAAR	MANTLE XENOLITH	PERIDOTITE, XENOLITH	Type 1a	54.28	0.3	3.2	0.81	2.36	0.08	17.02	20.66			1.1	99.81	92.7839	1312.77		1798.5						173	13.3	76.2	0.48	10.9	32.3	4.54	21.1	4.8	1.37	3.89	0.55	3.1	0.59	1.5		1.57	0.18			0.522981
samp. MM262	1998	[8052] WITT-EICKSCHEN G. (1998)	COMPOSITE MANTLE XENOLITH	EUROPEAN OROGENIC BELT - CENOZOIC/QUATERNARY / GERMANY / EIFEL / MEERFELDER MAAR	MANTLE XENOLITH	PERIDOTITE, XENOLITH	Type 1a	53.62	0.05	3.34	0.59	3.07	0.08	17.06	21.05			0.95	99.81	90.832	340.625		299.75						228	6.7	11.9	0.39	18.6	45.5	5.82	22.8	3.86	0.88	2.64	0.29	2.11	0.34	0.99		0.96	0.1	0.12		0.0876151
samp. MM82	1998	[8052] WITT-EICKSCHEN G. (1998)	NON-COMPOSITE MANTLE XENOLITH	EUROPEAN OROGENIC BELT - CENOZOIC/QUATERNARY / GERMANY / EIFEL / MEERFELDER MAAR	MANTLE XENOLITH	PERIDOTITE, XENOLITH	Type 1a	53.72	0.03	3.03	0.99	2.77	0.06	16.6	21.35			1.27	99.82	91.4416	171.286		179.85						357	6.9	23.8		30.26	61.26		24.06	2.99	1.05			1.09		0.76		0.74				0.193815
samp. MM332	1998	[8052] WITT-EICKSCHEN G. (1998)	COMPOSITE MANTLE XENOLITH	EUROPEAN OROGENIC BELT - CENOZOIC/QUATERNARY / GERMANY / EIFEL / MEERFELDER MAAR	MANTLE XENOLITH	PERIDOTITE, XENOLITH	Type 1a	53.96	0.07	3.96	0.49	3.2	0.17	16.35	20.34			1.4	99.94	90.1082	255.884		419.65						226	11.5	78	0.75	17.3	51.8	7.64	31.6	6.3	1.64	3.85	0.61	3.29	0.54	1.58		1.38	0.19	2.21		0.381833
samp. MM333	1998	[8052] WITT-EICKSCHEN G. (1998)	COMPOSITE MANTLE XENOLITH	EUROPEAN OROGENIC BELT - CENOZOIC/QUATERNARY / GERMANY / EIFEL / MEERFELDER MAAR	MANTLE XENOLITH	PERIDOTITE, XENOLITH	Type 1a	53.54	0.25	3.6	1.28	3.35	0.06	15.93	20.61			1.39	100.01	89.4492	942.61		1498.75						148	13.7	69.6	0.58	10.1	30.3	4.86	24.2	5.67	1.59	4.73	0.71	3.68	0.63	1.79		1.55	0.24	2.23		0.410396
samp. MM331	1998	[8052] WITT-EICKSCHEN G. (1998)	COMPOSITE MANTLE XENOLITH	EUROPEAN OROGENIC BELT - CENOZOIC/QUATERNARY / GERMANY / EIFEL / MEERFELDER MAAR	MANTLE XENOLITH	PERIDOTITE, XENOLITH	Type 1a	52.78	0.33	4.92	1.28	2.48	0.06	16.13	20.51			1.54	100.03	92.0609	1276.35		1978.35						202	11.8	94.4	1.1	20.1	50.8	6.91	28.6	4.74	1.55	4.84	0.72	3.14	0.58	1.5		1.3	0.14	2.02		0.560006
samp. MM326	1998	[8052] WITT-EICKSCHEN G. (1998)	COMPOSITE MANTLE XENOLITH	EUROPEAN OROGENIC BELT - CENOZOIC/QUATERNARY / GERMANY / EIFEL / MEERFELDER MAAR	MANTLE XENOLITH	PERIDOTITE, XENOLITH	Type 1a	53.74	0.12	3.1	0.86	3.17	0.11	16.98	20.72			1.25	100.05	90.5213	570.952		719.4						293	8.7	25	1.28	18.3	67.3	9.22	36.3	5.14	1.26	3.03	0.38	1.91	0.32	0.81		1.04	0.11			0.126415
samp. MM326	1998	[8052] WITT-EICKSCHEN G. (1998)	COMPOSITE MANTLE XENOLITH	EUROPEAN OROGENIC BELT - CENOZOIC/QUATERNARY / GERMANY / EIFEL / MEERFELDER MAAR	MANTLE XENOLITH	PERIDOTITE, XENOLITH	Type 1a	53.75	0.14	3.55	0.88	2.98	0.14	16.74	20.62			1.38	100.18	90.9217	729.826		839.3						238	7.93	23.4	0.67	13.5	50.5	7.21	30.7	4.77	1.15	2.49	0.33	1.84	0.32	0.83		0.66	0.1			0.133561
samp. MM262	1998	[8052] WITT-EICKSCHEN G. (1998)	COMPOSITE MANTLE XENOLITH	EUROPEAN OROGENIC BELT - CENOZOIC/QUATERNARY / GERMANY / EIFEL / MEERFELDER MAAR	MANTLE XENOLITH	PERIDOTITE, XENOLITH	Type 1a	54.77	0.15	2.79	0.64	3.31	0.1	16.58	20.89			1.03	100.26	89.9301	1096.65		899.25						214	7.65	15.2	0.29	17.6	46.8	5.91	23.4	3.48	0.82	2.5	0.35	1.84	0.28	0.82		0.92	0.1	0.2		0.116343
samp. MM262	1998	[8052] WITT-EICKSCHEN G. (1998)	COMPOSITE MANTLE XENOLITH	EUROPEAN OROGENIC BELT - CENOZOIC/QUATERNARY / GERMANY / EIFEL / MEERFELDER MAAR	MANTLE XENOLITH	PERIDOTITE, XENOLITH	Type 1a	54.88	0.2	2.89	0.51	3.33	0.14	16.41	20.99			0.96	100.31	89.7812	1275.53		1199						195	8.28	21.2	0.31	13.2	37.4	5.29	22	3.89	0.94	3.32	0.43	2.51	0.32	0.99		0.99	0.14	0.23		0.158286
samp. MM310	1998	[8052] WITT-EICKSCHEN G. (1998)	COMPOSITE MANTLE XENOLITH	EUROPEAN OROGENIC BELT - CENOZOIC/QUATERNARY / GERMANY / EIFEL / MEERFELDER MAAR	MANTLE XENOLITH	PERIDOTITE, XENOLITH	Type 1a	53.4	0.26	4.33	1.16	3.04	0.11	16.24	20.5			1.38	100.42	90.4982	824.709		1558.7						194	16	75.9	0.63	12.5	40.7	6.21	28.6	6.94	1.89	5.82	0.68	4.54	0.69	1.86		1.82	0.27			0.372111
samp. MM262	1998	[8052] WITT-EICKSCHEN G. (1998)	COMPOSITE MANTLE XENOLITH	EUROPEAN OROGENIC BELT - CENOZOIC/QUATERNARY / GERMANY / EIFEL / MEERFELDER MAAR	MANTLE XENOLITH	PERIDOTITE, XENOLITH	Type 1a	54.45	0.19	2.98	0.69	3.6	0.14	16.38	21.04			1.01	100.48	89.0256	1074.58		1139.05						149	8.4	42.9	0.39	10.5	28.9	3.85	15.8	3.49	1.06	2.31	0.43	2.43	0.39	1.05		1.08	0.12	0.33		0.399033
samp. MM307	1998	[8052] WITT-EICKSCHEN G. (1998)	COMPOSITE MANTLE XENOLITH	EUROPEAN OROGENIC BELT - CENOZOIC/QUATERNARY / GERMANY / EIFEL / MEERFELDER MAAR	MANTLE XENOLITH	PERIDOTITE, XENOLITH	Type 1a	54.17	0.13	4.85	1.41	2.68	0.11	16.36	19.44			1.48	100.63	91.585	455.76		779.35						198	13.5	90.1	1.72	17.7	60.2	8.69	37.3	7.18	1.71	5.35	0.7	3.99	0.68	1.77		1.73	0.24	2.56		0.380278
samp. MM310	1998	[8052] WITT-EICKSCHEN G. (1998)	COMPOSITE MANTLE XENOLITH	EUROPEAN OROGENIC BELT - CENOZOIC/QUATERNARY / GERMANY / EIFEL / MEERFELDER MAAR	MANTLE XENOLITH	PERIDOTITE, XENOLITH	Type 1a	53.69	0.31	4.24	1.52	2.62	0.05	16.2	21.08			1.06	100.77	91.6832	720.329		1858.45						236	17.3	75.3	1.63	18.1	59.4	9.2	42.3	8.16	2.58	5.88	0.86	4.55	0.74	2.04		1.84	0.23	1.01		0.279945
samp. IA/157	1986	[8192] STOSCH H.-G. (1986)	HYDROUS	EUROPEAN OROGENIC BELT - CENOZOIC/QUATERNARY / GERMANY / EIFEL / DREISER WEIHER	MANTLE XENOLITH	WEHRLITE, XENOLITH	Type 1a												0			50.6			4400	22	380		399.6				16.4	51		28	5.15	1.6		0.51	2.85	0.48			0.92	0.149	2.9		0
samp. IIA/40	1986	[8192] STOSCH H.-G. (1986)	ANHYDROUS	EUROPEAN OROGENIC BELT - CENOZOIC/QUATERNARY / GERMANY / EIFEL / DREISER WEIHER	MANTLE XENOLITH	WEBSTERITE, XENOLITH	Type 1a												0			48.8			7150	28	340	0	92.4				2.28	5.9	0.77	4.4	1.17	0.42		0.245	1.39	0.35		0.123	0.95	0.126	0.55		0
samp. D8	1986	[8192] STOSCH H.-G. (1986)		EUROPEAN OROGENIC BELT - CENOZOIC/QUATERNARY / GERMANY / EIFEL / DREISER WEIHER	WEHRLITE. XENOLITH		Type 1a															47.1			5850	19.4	290	0.112	325.1				8.6	36		20	5.55	1.7		0.5					1	0.17	4.4		0
samp. DF120	1986	[8192] STOSCH H.-G. (1986)		EUROPEAN OROGENIC BELT - CENOZOIC/QUATERNARY / GERMANY / EIFEL / MEERFELDER MAAR	LHERZOLITE. XENOLITH		Type 1a															69.8			4750	22.1	380	0	232.7				13.1	47		24	3.62	0.94		0.38					1.17	0.18	0.37		0
samp. 1233	1993	[8224] WITT-EICKSCHEN G. (1993)	ANHYDROUS XENOLITH	EUROPEAN OROGENIC BELT - CENOZOIC/QUATERNARY / GERMANY / EIFEL / DREISER WEIHER	PLUTONIC ROCK	PYROXENITE, CLINOPYROXENE	Type 1a	53	0.15	4.58	1.52	3.53	0.04	16.91	18.91			1.13	99.77	89.5185	1362.5		899.25										5.44	14		7	1.3	0.66							0.57	0.09
samp. IA/105	1980	[8360] STOSCH H.-G. (1980)	AMPHIBOLE- AND GLASS-BEARING	EUROPEAN OROGENIC BELT - CENOZOIC/QUATERNARY / GERMANY / EIFEL / DREISER WEIHER	MANTLE XENOLITH	PERIDOTITE, SPINEL, XENOLITH	Type 1a												0														21.5	54	8.3	30	3.4	0.9		0.26			0.98		0.67	0.114
samp. IA/171	1980	[8360] STOSCH H.-G. (1980)	AMPHIBOLE- AND GLASS-BEARING	EUROPEAN OROGENIC BELT - CENOZOIC/QUATERNARY / GERMANY / EIFEL / DREISER WEIHER	MANTLE XENOLITH	PERIDOTITE, SPINEL, XENOLITH	Type 1a												0														25	62	9	41	6.1	1.78	4.6	0.48		0.33	0.69		0.63	0.097
samp. IA/236	1980	[8360] STOSCH H.-G. (1980)	AMPHIBOLE- AND GLASS-BEARING	EUROPEAN OROGENIC BELT - CENOZOIC/QUATERNARY / GERMANY / EIFEL / DREISER WEIHER	MANTLE XENOLITH	PERIDOTITE, SPINEL, XENOLITH	Type 1a												0														14.6	14.4	0.95	3	0.56	0.195	0.79	0.163		0.38		0.17	1.1	0.168
samp. IA/249	1980	[8360] STOSCH H.-G. (1980)	AMPHIBOLE- AND GLASS-BEARING	EUROPEAN OROGENIC BELT - CENOZOIC/QUATERNARY / GERMANY / EIFEL / DREISER WEIHER	MANTLE XENOLITH	PERIDOTITE, SPINEL, XENOLITH	Type 1a												0														40	106	14.2	47	7.6	2.3		0.6	4.7		1.9		1.09	0.163
samp. W1332	1994	[8622] WITT-EICKSCHEN G. (1994)	AMPHIBOLE-BEARING	EUROPEAN OROGENIC BELT - CENOZOIC/QUATERNARY / GERMANY / EIFEL / MEERFELDER MAAR/DREISER WEIHER	MANTLE XENOLITH	PERIDOTITE, SPINEL, XENOLITH	Type 1a	53.15	0.03	3.61	0.65	2.81	0.1	16.13	20.26			1.2	97.94	91.0985	178.069		179.85						182	8.08	58.16	0.41	12.64	37.6	5.35	22.64	3.94	1.01	2.66	0.4	2.24	0.4	1.02		0.82	0.11	2.02		0.425335
samp. W110	1994	[8622] WITT-EICKSCHEN G. (1994)	AMPHIBOLE-BEARING	EUROPEAN OROGENIC BELT - CENOZOIC/QUATERNARY / GERMANY / EIFEL / MEERFELDER MAAR/DREISER WEIHER	MANTLE XENOLITH	PERIDOTITE, SPINEL, XENOLITH	Type 1a	53.37	0.06	4.17	1.59	2.55	0.07	15.81	20.21			1.53	99.36	91.7039	160.58		359.7						225	16.64	45.98	1.66	22	66.4	9.88	43.78	9.21	2.24	6.1	0.92	5.07	0.79	2.05		1.82	0.22	1.15		0.158159
samp. W788	1994	[8622] WITT-EICKSCHEN G. (1994)		EUROPEAN OROGENIC BELT - CENOZOIC/QUATERNARY / GERMANY / EIFEL / MEERFELDER MAAR/DREISER WEIHER	PERIDOTITE. SPINEL. XENOLITH	TABULAR OR MOSAIC EQUIGRANULAR	Type 1a	54.16	0.04	3.32	0.52	2.39	0.09	16.37	21.86			0.74	99.49	92.4309	510.213		239.8						261	6.17	1.04	0.15	21.58	56.68	4.83	14.56	1.6	0.47	0.69	0.17	1.17	0.22	0.75		0.89	0.12			0.0148828
samp. W194	1994	[8622] WITT-EICKSCHEN G. (1994)	AMPHIBOLE-BEARING	EUROPEAN OROGENIC BELT - CENOZOIC/QUATERNARY / GERMANY / EIFEL / MEERFELDER MAAR/DREISER WEIHER	MANTLE XENOLITH	PERIDOTITE, SPINEL, XENOLITH	Type 1a	54.11	0.06	2.91	1.28	2.8	0.06	16.6	20.39			1.33	99.54	91.3569	140.508		359.7						576	11.33	28.3	1.1	31.17	84.91	11.12	46.27	8.42	2.56	6.64	0.79	4.03	0.59	1.38		0.84	0.12	0.52		0.0990316
samp. W1262	1994	[8622] WITT-EICKSCHEN G. (1994)	AMPHIBOLE-BEARING	EUROPEAN OROGENIC BELT - CENOZOIC/QUATERNARY / GERMANY / EIFEL / MEERFELDER MAAR/DREISER WEIHER	MANTLE XENOLITH	PERIDOTITE, SPINEL, XENOLITH	Type 1a	53.62	0.05	3.34	0.59	3.07	0.08	17.06	21.05			0.95	99.81	90.832	280.14		299.75						256	8.44	14.8	0.43	21.9	58.1	7.46	29.2	4.37	1.07	3.17	0.36	2.33	0.39	1.38		1.41	0.12	0.83		0.0904946
samp. W1317	1994	[8622] WITT-EICKSCHEN G. (1994)	AMPHIBOLE-BEARING	EUROPEAN OROGENIC BELT - CENOZOIC/QUATERNARY / GERMANY / EIFEL / MEERFELDER MAAR/DREISER WEIHER	MANTLE XENOLITH	PERIDOTITE, SPINEL, XENOLITH	Type 1a	53.56	0.19	4.71	1.62	2.6	0.1	15.7	20.06			1.34	99.88	91.5008	561.108		1139.05						255	15.98	67.3	1.71	24.7	71.56	9.86	40.08	7.82	2.03	6.13	0.92	5.18	0.77	2.33		1.89	0.26	0.84		0.262568
samp. W1307	1994	[8622] WITT-EICKSCHEN G. (1994)	AMPHIBOLE-BEARING	EUROPEAN OROGENIC BELT - CENOZOIC/QUATERNARY / GERMANY / EIFEL / MEERFELDER MAAR/DREISER WEIHER	MANTLE XENOLITH	PERIDOTITE, SPINEL, XENOLITH	Type 1a	54.17	0.13	4.85	1.41	2.68	0.11	16.36	19.44			1.48	100.63	91.585	416.765		779.35						202	13.35	96.74	1.51	16.68	56.87	8.3	34.87	6.75	1.87	4.99	0.73	3.86	0.64	1.81		1.73	0.18	2.32		0.435533
samp. W211	1994	[8622] WITT-EICKSCHEN G. (1994)	AMPHIBOLE-BEARING	EUROPEAN OROGENIC BELT - CENOZOIC/QUATERNARY / GERMANY / EIFEL / MEERFELDER MAAR/DREISER WEIHER	MANTLE XENOLITH	PERIDOTITE, SPINEL, XENOLITH	Type 1a	54.12	0.04	3.11	1.05	3.73	0.06	16.57	20.98			1.15	100.81	88.7895	119.9		239.8						445	10.74	25.91	0.85	33.29	81.92	10.41	42.48	6.94	2	4.99	0.76	3.71	0.59	1.46		1.25	0.17	0.18		0.104229
samp. W766	1994	[8622] WITT-EICKSCHEN G. (1994)	AMPHIBOLE-BEARING	EUROPEAN OROGENIC BELT - CENOZOIC/QUATERNARY / GERMANY / EIFEL / MEERFELDER MAAR/DREISER WEIHER	MANTLE XENOLITH	PERIDOTITE, SPINEL, XENOLITH	Type 1a	53.75	0.12	5.08	1.09	2.89	0.05	16.23	21.05			1.14	101.4	90.9194	790.549		719.4						238	9.25	19.49	1.51	22.85	65.09	7.51	23.03	3.33	0.91	1.75	0.36	2.24	0.42	1.38		1.41	0.22			0.153722
samp. W1310	1994	[8622] WITT-EICKSCHEN G. (1994)	AMPHIBOLE-BEARING	EUROPEAN OROGENIC BELT - CENOZOIC/QUATERNARY / GERMANY / EIFEL / MEERFELDER MAAR/DREISER WEIHER	MANTLE XENOLITH	PERIDOTITE, SPINEL, XENOLITH	Type 1a	53.4	0.26	4.33	1.16	3.04	0.11	16.24	21.5			1.38	101.42	90.4982	1105.46		1558.7						178	13.39	76.94	0.49	11.23	33.27	4.68	21.73	4.94	1.41	4.01	0.56	3.19	0.61	1.21		1.62	0.18			0.512923
samp. DW284	2003	[8634] WITT-EICKSCHEN G. (2003)	RECRYSTALLIZED	EUROPEAN OROGENIC BELT - CENOZOIC/QUATERNARY / GERMANY / EIFEL / DREISER WEIHER	MANTLE XENOLITH	NOT GIVEN	Type 1a	52.96	0.05	3.75	0.59	2.51	0.08	16.59	22.12			0.88	99.53	92.1777	305.882		260					0.06	331	7.3	9.2	1.52	19.7	62.3		27.1	3.3	0.85	1.73		1.2	0.25	0.77		0.78	0.12	0.15	0.2	0.0671954
samp. MM271	2003	[8634] WITT-EICKSCHEN G. (2003)	NON-COMPOSITE MANTLE XENOLITH	EUROPEAN OROGENIC BELT - CENOZOIC/QUATERNARY / GERMANY / EIFEL / MEERFELDER MAAR	MANTLE XENOLITH	PERIDOTITE, XENOLITH	Type 1a	53.39	0.16	4.15	1.51	3.1	0.1	16.15	19.4			1.63	99.59	90.2801	636.41		1241					0	305	16.7	41.9	1.73	19.6	63.1		38.1	6.8	1.95	4.9		3.2	0.59	1.5		1.29	0.18	0.52	0.26	0.1798
samp. MM766	2003	[8634] WITT-EICKSCHEN G. (2003)	RECRYSTALLIZED	EUROPEAN OROGENIC BELT - CENOZOIC/QUATERNARY / GERMANY / EIFEL / MEERFELDER MAAR	MANTLE XENOLITH	NOT GIVEN	Type 1a	53.22	0.08	4.34	0.78	2.55	0.09	16.63	20.85			1.1	99.64	92.0806	590.141		419					0.01	278	9	12.1	1.08	18.7	54.7		19.5	2.5	0.71	1.89		1.59	0.31	0.9		0.84	0.13	0.16	0.12	0.119699
samp. DW582	2003	[8634] WITT-EICKSCHEN G. (2003)	RECRYSTALLIZED	EUROPEAN OROGENIC BELT - CENOZOIC/QUATERNARY / GERMANY / EIFEL / DREISER WEIHER	MANTLE XENOLITH	NOT GIVEN	Type 1a	53.37	0.05	3.42	0.77	2.43	0.06	16.9	21.77			0.94	99.71	92.537	320.482		266					0	216	9	14.2	1.15	13.7	39.9		18.8	3	0.83	2.02		1.56	0.3	0.84		0.8	0.12		0.14	0.1306
samp. MM278	2003	[8634] WITT-EICKSCHEN G. (2003)	RECRYSTALLIZED	EUROPEAN OROGENIC BELT - CENOZOIC/QUATERNARY / GERMANY / EIFEL / MEERFELDER MAAR	MANTLE XENOLITH	NOT GIVEN	Type 1a	53.18	0.06	3.73	0.54	2.62	0.07	16.96	21.91			0.74	99.81	92.0262	684		342					0.04	220	8.3	12.7	0.55	22.5	45.3		13.9	1.79	0.5	1.37		1.35	0.29	0.89		0.9	0.13	0.18	0.11	0.175858
samp. MM262	2003	[8634] WITT-EICKSCHEN G. (2003)	RECRYSTALLIZED	EUROPEAN OROGENIC BELT - CENOZOIC/QUATERNARY / GERMANY / EIFEL / MEERFELDER MAAR	MANTLE XENOLITH	NOT GIVEN	Type 1a	53.62	0.05	3.34	0.59	3.07	0.08	17.06	21.05			0.95	99.81	90.832	252.083		242					0.2	317	9.2	12.9	0.72	26.1	67		26.5	3.7	0.96	2.2		1.64	0.32	0.92		0.87	0.13	0.16	0.08	0.0899827
samp. DW211	2003	[8634] WITT-EICKSCHEN G. (2003)	RECRYSTALLIZED	EUROPEAN OROGENIC BELT - CENOZOIC/QUATERNARY / GERMANY / EIFEL / DREISER WEIHER	MANTLE XENOLITH	NOT GIVEN	Type 1a	54.12	0.04	3.11	1.05	2.8	0.06	16.57	20.98			1.15	99.88	91.3426	116.019		239					0.01	566	13.4	24.8	0.85	31.2	80.2		41.9	7.2	2.06	4.6		2.8	0.48	1.23		1.03	0.15	0.2	0.08	0.0986215
samp. DW196A	2009	[13225] WITT-EICKSCHEN G.(2009) [GeoReM [5092] ]	ANHYDROUS	EUROPEAN OROGENIC BELT - CENOZOIC/QUATERNARY / GERMANY / EIFEL / DREISER WEIHER	MANTLE XENOLITH	HARZBURGITE, XENOLITH	Ti-rich in PC veins and werhlite	51.89	0.55	7.56	0.97	3.57	0.12	16.33	17.48			1.76	100.23	89.0774	4908.96	44.5	3289	231.7	4390	28.6	384		71.4	16.25	29	0.19	1.03	4		4.33	1.632	0.67	2.26	0.38	2.75	0.59	1.7		1.51	0.226	0.91	0.0175	0.753507
samp. DW-V2	2005	[13652] WITT-EICKSCHEN G.(2005) [GeoReM [1802] ]		EUROPEAN OROGENIC BELT - CENOZOIC/QUATERNARY / GERMANY / EIFEL / DREISER WEIHER	MANTLE XENOLITH	LHERZOLITE, SPINEL, XENOLITH	Ti-rich in PC veins and werhlite	51.24	0.64	5.68	1.69	3.44	0.11	17.68	17.2			1.03	98.71	90.1605	8379.39	34.6	3821	200	11595	31.1	477		52	7.8	13.56	0.199	1.029	3.738		3.769	1.252	0.456	1.525		1.507	0.283	0.707		0.494	0.063	0.61	0.021	0.431159
samp. DW599	2005	[13652] WITT-EICKSCHEN G.(2005) [GeoReM [1802] ]		EUROPEAN OROGENIC BELT - CENOZOIC/QUATERNARY / GERMANY / EIFEL / DREISER WEIHER	MANTLE XENOLITH	LHERZOLITE, SPINEL, XENOLITH	Ti-rich in PC veins and werhlite	51.46	0.38	7.42	1.11	3.32	0.1	16.72	17.92			1.47	99.9	89.9788	4105.17	48.5	2303	222	7612	28.8	448		63	16.14	24.4	0.267	0.832	2.924		3.263	1.339	0.561	2.024		2.505	0.547	1.579		1.414	0.212	0.715	0.02	0.806277
samp. MM1213	2005	[13652] WITT-EICKSCHEN G.(2005) [GeoReM [1802] ]		EUROPEAN OROGENIC BELT - CENOZOIC/QUATERNARY / GERMANY / EIFEL / MEERFELDER MAAR	MANTLE XENOLITH	LHERZOLITE, SPINEL, XENOLITH	Ti-rich in PC veins and werhlite	53.37	0.07	4.3	1.67	3.01	0.1	18.61	18.44			0.73	100.3	91.6826	2108.91	37.1	426	145	11407	32.4	534		30.7	6.29	2.72	0.208	0.773	2.221		1.502	0.491	0.202	0.787		1.055	0.227	0.637		0.567	0.075	0.088	0.013	0.218769
samp. DW1342	2005	[13652] WITT-EICKSCHEN G.(2005) [GeoReM [1802] ]		EUROPEAN OROGENIC BELT - CENOZOIC/QUATERNARY / GERMANY / EIFEL / DREISER WEIHER	MANTLE XENOLITH	LHERZOLITE, SPINEL, XENOLITH	Ti-rich in PC veins and werhlite	53.1	0.44	5.04	1.71	3.1	0.12	17.4	18.15			1.34	100.4	90.915	3491.98	45.7	2612	164	11713	30.8	493		99.5	9.23	23.84	0.443	2.679	9.6		8.216	2.221	0.748	2.249		1.79	0.328	0.822		0.601	0.081	0.842	0.042	0.385474
samp. DW1283	2005	[13652] WITT-EICKSCHEN G.(2005) [GeoReM [1802] ]		EUROPEAN OROGENIC BELT - CENOZOIC/QUATERNARY / GERMANY / EIFEL / DREISER WEIHER	MANTLE XENOLITH	LHERZOLITE, SPINEL, XENOLITH	Ti-rich in PC veins and werhlite	53.28	0.17	5.09	1.72	3.17	0.09	18.06	18.09			1.03	100.7	91.0373	3002.93	37.1	1024	200	11786	31.7	517		68.2	6.03	12.69	0.786	2.375	5.146		3.278	0.973	0.341	1.058		0.974	0.188	0.51		0.435	0.064	0.338	0.077	0.490788
samp. 97G02	2005	[13677] SHAW C. S. J. (2005)		EUROPEAN OROGENIC BELT - CENOZOIC/QUATERNARY / GERMANY / EIFEL / GEESER MAAR	MANTLE XENOLITH	WEHRLITE, XENOLITH	Ti-rich in PC veins and werhlite	49.8	0.98	3.43	0.96	3.6	0.07	15.33	22.43			0.49	97.09	88.3614	4937.06		5875.1					1.97	154	12.2	137	1.5	5.17	19.92	3.58	18.39	4.82	1.19	3.94	0.47	2.94	0.41	1.24	0.12	0.85	0.11	5.74	0.19	1.00508
samp. 97MF8	2005	[13677] SHAW C. S. J. (2005)		EUROPEAN OROGENIC BELT - CENOZOIC/QUATERNARY / GERMANY / EIFEL / MEERFELDER MAAR	MANTLE XENOLITH	WEHRLITE, XENOLITH	Ti-rich in PC veins and werhlite	48.21	1.19	5.02	0.07	4.59	0.1	14.76	22.82			1	97.76	85.1482	5707.24		7134.05					0.13	122	12.07	83	0.77	6.07	20.03	3.2	15.3	3.84	1.25	3.62	0.5	2.7	0.5	1.16	0.14	0.91	0.11	3.26	0.16	0.747928
samp. 98MF8	2005	[13677] SHAW C. S. J. (2005)		EUROPEAN OROGENIC BELT - CENOZOIC/QUATERNARY / GERMANY / EIFEL / MEERFELDER MAAR	MANTLE XENOLITH	WEHRLITE, XENOLITH	Ti-rich in PC veins and werhlite	49.01	0.92	4.2	0.43	4.24	0.08	15.2	22.85			0.93	97.86	86.4709	5252.76		5515.4					0.05	108	10.8	67.2	0.35	5.41	17.71	2.81	13.52	3.4	1.05	3.22	0.44	2.38	0.46	1.08	0.11	0.68	0.11	3.02	0.09	0.684596
samp. 98KY02A	2005	[13677] SHAW C. S. J. (2005)		EUROPEAN OROGENIC BELT - CENOZOIC/QUATERNARY / GERMANY / EIFEL / ROCKESKYLLERKOPF VOLCANIC COMPLEX	MANTLE XENOLITH	WEHRLITE, XENOLITH	Ti-rich in PC veins and werhlite	48.34	0.9	3.98	0.63	4.27	0.1	15.21	24.12			0.5	98.05	86.3959	4534.03		5395.5					0.09	132	9.92	159	0.51	5.08	21.1	3.28	16.26	3.93	1.19	3.24	0.42	2.29	0.38	0.83	0.11	0.77	0.1	6.8	0.15	1.37383
samp. 97G02	2005	[13677] SHAW C. S. J. (2005)		EUROPEAN OROGENIC BELT - CENOZOIC/QUATERNARY / GERMANY / EIFEL / GEESER MAAR	MANTLE XENOLITH	WEHRLITE, XENOLITH	Ti-rich in PC veins and werhlite	49.29	0.92	3.62	1.33	3.77	0.07	15.14	23.55			0.5	98.19	87.7449	5203.21		5515.4					1.89	193	10.69	103.5	1.07	4.63	17.52	3.12	16.22	3.88	1.06	3.16	0.41	2.33	0.37	0.85	0.12	0.69	0.11	3.89	0.15	0.90114
samp. 96G01	2005	[13677] SHAW C. S. J. (2005)		EUROPEAN OROGENIC BELT - CENOZOIC/QUATERNARY / GERMANY / EIFEL / GEESER MAAR	MANTLE XENOLITH	WEHRLITE, XENOLITH	Ti-rich in PC veins and werhlite	49.91	0.89	4.19	0.97	3.91	0.06	15.01	23.12			0.59	98.65	87.2518	2736.18		5335.55					0.02	180	17.65	272	0.91	9.1	30.9	5.79	28.86	7.27	1.95	5.74	0.75	4.44	0.67	1.59	0.22	1.3	0.19	10.45	0.44	1.29702
samp. 97G02	2005	[13677] SHAW C. S. J. (2005)		EUROPEAN OROGENIC BELT - CENOZOIC/QUATERNARY / GERMANY / EIFEL / GEESER MAAR	MANTLE XENOLITH	WEHRLITE, XENOLITH	Ti-rich in PC veins and werhlite	50.5	0.38	2.5	0.65	3.6	0.09	17.88	22.94			0.4	98.94	89.8528	1779.77		2278.1					0.19	179	12.1	112	0.44	5.86	20.25	3.84	19.65	4.64	1.28	3.73	0.5	2.7	0.48	1.12	0.13	0.77	0.11	4.39	0.19	0.81016
samp. 98MF8	2005	[13677] SHAW C. S. J. (2005)		EUROPEAN OROGENIC BELT - CENOZOIC/QUATERNARY / GERMANY / EIFEL / MEERFELDER MAAR	MANTLE XENOLITH	WEHRLITE, XENOLITH	Ti-rich in PC veins and werhlite	50.31	0.83	4.23	0.88	4.01	0.09	15.01	22.69			1.05	99.1	86.9683	3917.99		4975.85					0	108	12.1	90	0.58	5.9	19.48	3.15	14.98	3.88	1.27	3.66	0.48	2.76	0.51	1.19	0.15	0.87	0.13	4.15	0.16	0.815387
samp. G96-1	2005	[13677] SHAW C. S. J. (2005)		EUROPEAN OROGENIC BELT - CENOZOIC/QUATERNARY / GERMANY / EIFEL / GEESER MAAR	MANTLE XENOLITH	WEHRLITE, XENOLITH	Ti-rich in PC veins and werhlite	49.09	1.41	5.26	0.19	4.16	0.07	14.88	23.61			0.58	99.25	86.4448	5001.75		8452.95						184	14.71	184.5	0.69	7.17	27.5	4.92	24.92	5.87	1.69	5.07	0.6	3.5	0.57	1.41	0.19	0.94	0.15	7.05	0.26	1.05365
samp. 98KY07	2005	[13677] SHAW C. S. J. (2005)		EUROPEAN OROGENIC BELT - CENOZOIC/QUATERNARY / GERMANY / EIFEL / ROCKESKYLLERKOPF VOLCANIC COMPLEX	MANTLE XENOLITH	WEHRLITE, XENOLITH	Ti-rich in PC veins and werhlite	53.57	0.15	1.69	0.62	2.92	0.1	17.28	22.74			0.74	99.81	91.3425	1763.24		899.25					0.02	130	5.52	3.6	0.08	4.36	15.39	2.24	8.84	1.5	0.51	1.15	0.15	0.94	0.19	0.54	0.07	0.5	0.08	0.14		0.0682848
samp. 98KY02A	2005	[13677] SHAW C. S. J. (2005)		EUROPEAN OROGENIC BELT - CENOZOIC/QUATERNARY / GERMANY / EIFEL / ROCKESKYLLERKOPF VOLCANIC COMPLEX	MANTLE XENOLITH	WEHRLITE, XENOLITH	Ti-rich in PC veins and werhlite	49.9	1	4.27	0.43	4.52	0.1	15.13	24.25			0.45	100.05	85.6485	5877.45		5995					0.02	122	8.17	87	0.48	4.5	17.73	2.97	14.25	3.48	1.02	2.76	0.35	1.89	0.3	0.77	0.08	0.63	0.07	4.44	0.12	0.853327
samp. 98KY02	2005	[13677] SHAW C. S. J. (2005)		EUROPEAN OROGENIC BELT - CENOZOIC/QUATERNARY / GERMANY / EIFEL / ROCKESKYLLERKOPF VOLCANIC COMPLEX	MANTLE XENOLITH	WEHRLITE, XENOLITH	Ti-rich in PC veins and werhlite	50.33	0.69	4.04	1.25	3.5	0.12	15.46	24.27			0.51	100.17	88.7327	2686.07		4136.55					0.84	245	18.1	317	6.5	17.29	36.63	5.4	25.33	5.37	1.54	5.21	0.62	3.54	0.67	1.54	0.19	1.29	0.2	11.49	0.37	1.87736
samp. 96G01	2005	[13677] SHAW C. S. J. (2005)		EUROPEAN OROGENIC BELT - CENOZOIC/QUATERNARY / GERMANY / EIFEL / GEESER MAAR	MANTLE XENOLITH	WEHRLITE, XENOLITH	Ti-rich in PC veins and werhlite	49.26	1.26	5.19	0.8	4.19	0.11	14.9	24.12			0.39	100.22	86.3761	3776.85		7553.7					0.24	193	16.74	241.1	1.71	9.62	34.22	6.23	29.7	6.89	2	5.76	0.73	3.95	0.61	1.62	0.19	1.21	0.16	8.49	0.55	1.16413
samp. 98KY02	2005	[13677] SHAW C. S. J. (2005)		EUROPEAN OROGENIC BELT - CENOZOIC/QUATERNARY / GERMANY / EIFEL / ROCKESKYLLERKOPF VOLCANIC COMPLEX	MANTLE XENOLITH	WEHRLITE, XENOLITH	Ti-rich in PC veins and werhlite	50.62	0.57	4.5	0.94	3.54	0.12	15.22	24.28			0.52	100.31	88.4598	2550.11		3417.15					0.1	130	13.05	409	0.83	6.01	21.33	3.83	19.6	4.73	1.34	4.04	0.54	2.99	0.51	1.27	0.15	1.02	0.14	12.69	0.33	2.93399
samp. G96-1	2005	[13677] SHAW C. S. J. (2005)		EUROPEAN OROGENIC BELT - CENOZOIC/QUATERNARY / GERMANY / EIFEL / GEESER MAAR	MANTLE XENOLITH	WEHRLITE, XENOLITH	Ti-rich in PC veins and werhlite	50.66	0.78	4.65	0.69	3.87	0.08	15.1	24.23			0.49	100.55	87.4316	2338.05		4676.1					0.54	171	18.68	300	2.51	11.64	31.41	6.17	30.3	7.46	2	5.97	0.78	4.48	0.71	1.68	0.23	1.42	0.21	12.41	0.66	1.37824
samp. 98KY07	2005	[13677] SHAW C. S. J. (2005)		EUROPEAN OROGENIC BELT - CENOZOIC/QUATERNARY / GERMANY / EIFEL / ROCKESKYLLERKOPF VOLCANIC COMPLEX	MANTLE XENOLITH	WEHRLITE, XENOLITH	Ti-rich in PC veins and werhlite	49.03	1.46	5.71	0.01	5.81	0.06	13.98	23.99			0.58	100.63	81.0962	10805.8		8752.7					0.06	115	7.35	106	0.53	4.62	26.26	2.69	13.68	3.28	0.81	2.36	0.33	1.65	0.27	0.68	0.09	0.57	0.09	4.82	0.12	1.093
samp. 98KY06	2005	[13677] SHAW C. S. J. (2005)		EUROPEAN OROGENIC BELT - CENOZOIC/QUATERNARY / GERMANY / EIFEL / ROCKESKYLLERKOPF VOLCANIC COMPLEX	MANTLE XENOLITH	DUNITE, XENOLITH	Ti-rich in PC veins and werhlite	50.24	1.18	4.68	0.1	5.3	0.06	14.71	23.96			0.51	100.74	83.1886	8038.75		7074.1					0.14	120	6.63	37.8	0.57	4.96	16.15	2.6	12.3	2.73	0.88	2.27	0.27	1.5	0.25	0.5	0.07	0.9	0.05	1.87	0.1	0.450558
samp. 98KY06	2005	[13677] SHAW C. S. J. (2005)		EUROPEAN OROGENIC BELT - CENOZOIC/QUATERNARY / GERMANY / EIFEL / ROCKESKYLLERKOPF VOLCANIC COMPLEX	MANTLE XENOLITH	DUNITE, XENOLITH	Ti-rich in PC veins and werhlite	49.9	0.76	6	0.89	4.05	0.08	14.75	23.78			0.61	100.82	86.6546	2336.51		4556.2					0	163	19.7	111	1.01	8.34	31.88	5.86	30.96	7.37	1.95	5.55	0.77	4.4	0.86	2.13	0.26	1.36	0.21	3.69	0.36	0.507554
samp. 98KY07	2005	[13677] SHAW C. S. J. (2005)		EUROPEAN OROGENIC BELT - CENOZOIC/QUATERNARY / GERMANY / EIFEL / ROCKESKYLLERKOPF VOLCANIC COMPLEX	MANTLE XENOLITH	WEHRLITE, XENOLITH	Ti-rich in PC veins and werhlite	51.16	0.92	3.72	0.1	4.95	0.09	15.2	24.2			0.64	100.98	84.5553	7660.28		5515.4					0.09	116	5.8	30.4	0.53	3.74	13.57	2.44	11.2	2.3	0.72	2.04	0.24	1.29	0.21	0.51	0.06	0.37	0.04	1.36	0.05	0.413708
samp. 98KY06	2005	[13677] SHAW C. S. J. (2005)		EUROPEAN OROGENIC BELT - CENOZOIC/QUATERNARY / GERMANY / EIFEL / ROCKESKYLLERKOPF VOLCANIC COMPLEX	MANTLE XENOLITH	DUNITE, XENOLITH	Ti-rich in PC veins and werhlite	50.25	0.59	5.88	0.89	3.87	0.05	14.83	24.08			0.56	101	87.232	1615.09		3537.05					0.1	165	19.4	131	2.1	9.25	37.75	6.83	32.86	7.29	2.19	5.97	0.77	4.38	0.81	1.9	0.26	1.51	0.17	3.7	0.5	0.584611
samp. 98KY06	2005	[13677] SHAW C. S. J. (2005)		EUROPEAN OROGENIC BELT - CENOZOIC/QUATERNARY / GERMANY / EIFEL / ROCKESKYLLERKOPF VOLCANIC COMPLEX	MANTLE XENOLITH	DUNITE, XENOLITH	Ti-rich in PC veins and werhlite	51.17	1.04	4.09	0.06	5.06	0.06	15.24	23.88			0.51	101.11	84.3009	7249.77		6234.8					0.92	117	7.57	59.2	0.48		13.17	2.58	12.69	3.33	0.86	2.57	0.34	1.76	0.3	0.76	0.09	0.44	0.05	2.9	0.13	0.629016
samp. 12b	2018	[22049] SHAW C. S. J. (2018)		EUROPEAN OROGENIC BELT - CENOZOIC/QUATERNARY / GERMANY / EIFEL / ROCKESKYLLERKOPF VOLCANIC COMPLEX	WEHRLITE. PHLOGOPITE. XENOLITH		Ti-rich in PC veins and werhlite												0		2010.65	43.5	4343	244	3921		312.4		214	16.26	150.79	0.99	8.84	34.53		33.15	7.42	2.16		0.83	4.13	0.7	1.68	0.22	1.32	0.17	4.23		0.664082
samp. 12b	2018	[22049] SHAW C. S. J. (2018)		EUROPEAN OROGENIC BELT - CENOZOIC/QUATERNARY / GERMANY / EIFEL / ROCKESKYLLERKOPF VOLCANIC COMPLEX	WEHRLITE. PHLOGOPITE. XENOLITH		Ti-rich in PC veins and werhlite												0		2628.83	40	7387	282	3630		283.6		180	22.16	343.99	2.32	13.48	46.71		42.66	9.82	2.81		1.05	5.92	0.95	2.41	0.29	1.8	0.24	11.8		1.16084
samp. 12d	2018	[22049] SHAW C. S. J. (2018)		EUROPEAN OROGENIC BELT - CENOZOIC/QUATERNARY / GERMANY / EIFEL / ROCKESKYLLERKOPF VOLCANIC COMPLEX	WEHRLITE. PHLOGOPITE. XENOLITH		Ti-rich in PC veins and werhlite												0		3414.63	49.9	5600	195	68		278.4		180	12.66	171.45	0.8	7.21	24.31		24.79	5.7	1.64		0.7	3.59	0.51	1.25	0.15	0.93	0.12	8.25		0.996219
samp. 199C	2018	[22049] SHAW C. S. J. (2018)		EUROPEAN OROGENIC BELT - CENOZOIC/QUATERNARY / GERMANY / EIFEL / ROCKESKYLLERKOPF VOLCANIC COMPLEX	MANTLE XENOLITH	LHERZOLITE, AMPHIBOLE, XENOLITH	Ti-rich in PC veins and werhlite												0		1996.88	61.8	1278	226	6699		423.5		186		13.12	0.51	13.32	28.9		11.53	1.76	0.64		0.32	2.08	0.46	1.27	0.16	1.29	0.18	0.37		0.201167
samp. 199C	2018	[22049] SHAW C. S. J. (2018)		EUROPEAN OROGENIC BELT - CENOZOIC/QUATERNARY / GERMANY / EIFEL / ROCKESKYLLERKOPF VOLCANIC COMPLEX	MANTLE XENOLITH	LHERZOLITE, AMPHIBOLE, XENOLITH	Ti-rich in PC veins and werhlite												0		3460.34	70.1	2007	274	6983		433.2		189		11.75	0.77	14.17	27.84		9.59	1.61	0.58		0.34	2.31	0.52	1.51	0.19	1.31	0.18	0.41		0.206542
samp. 212D	2018	[22049] SHAW C. S. J. (2018)		EUROPEAN OROGENIC BELT - CENOZOIC/QUATERNARY / GERMANY / EIFEL / ROCKESKYLLERKOPF VOLCANIC COMPLEX	WEHRLITE. PHLOGOPITE. XENOLITH		Ti-rich in PC veins and werhlite												0		5490.2	85	5600	186	6896		250.1		164	8.76	49.15	0.22	4.06	12.74		14.51	3.44	1.02		0.36	2.18	0.37	0.89	0.12	0.72	0.09	2.36		0.480511
samp. 212D	2018	[22049] SHAW C. S. J. (2018)		EUROPEAN OROGENIC BELT - CENOZOIC/QUATERNARY / GERMANY / EIFEL / ROCKESKYLLERKOPF VOLCANIC COMPLEX	MANTLE XENOLITH	WEHRLITE, PHLOGOPITE, XENOLITH	Ti-rich in PC veins and werhlite	51.27	0.69	3.17	1.17	4.11	0.09	15.54	22.48			0.58	99.1	87.0819	3709.88	74	3005	168	4418		276.3		159	7.11	19.26	0.09	2.95	9.85		10.98	2.68	0.81		0.29	1.82	0.31	0.71	0.1	0.61	0.08	0.74		0.245234
samp. 49C	2018	[22049] SHAW C. S. J. (2018)		EUROPEAN OROGENIC BELT - CENOZOIC/QUATERNARY / GERMANY / EIFEL / ROCKESKYLLERKOPF VOLCANIC COMPLEX	MANTLE XENOLITH	HARZBURGITE, AMPHIBOLE, XENOLITH	Ti-rich in PC veins and werhlite	51.91	0.21	4.38	0.76	2.64	0.07	15.63	22.23			1.3	99.13	91.3461	1743.18	69.6	767	478	105		39.1		142	6.4	11.57	1.1	5.53	12.26		7.87	1.4	0.44		0.24	1.42	0.25	0.72	0.09	0.68	0.1	0.3		0.240755
samp. 12B	2018	[22049] SHAW C. S. J. (2018)	VEINED	EUROPEAN OROGENIC BELT - CENOZOIC/QUATERNARY / GERMANY / EIFEL / ROCKESKYLLERKOPF VOLCANIC COMPLEX	MANTLE XENOLITH	WEHRLITE, PHLOGOPITE, XENOLITH	Ti-rich in PC veins and werhlite	49.71	1.15	5.34	0.4	3.94	0.09	14.84	23.31			0.58	99.36	87.0386	2628.83	40	7387	282	3630		283.6		180	22.16	343.99	2.32	13.48	46.71		42.66	9.82	2.81		1.05	5.92	0.95	2.41	0.29	1.8	0.24	11.8		1.16084
samp. 12D	2018	[22049] SHAW C. S. J. (2018)	VEINED	EUROPEAN OROGENIC BELT - CENOZOIC/QUATERNARY / GERMANY / EIFEL / ROCKESKYLLERKOPF VOLCANIC COMPLEX	MANTLE XENOLITH	WEHRLITE, PHLOGOPITE, XENOLITH	Ti-rich in PC veins and werhlite	49.77	1.16	5.27	0.39	5.39	0.12	14.27	22.71			0.53	99.61	82.518	2631.17	39.7	4052	169	50		538.7		139	13.43	172.09	1.5	7.68	21.25		23.51	5.56	1.54		0.75	3.67	0.54	1.27	0.15	0.95	0.13	8.39		1.03965
samp. 44I	2018	[22049] SHAW C. S. J. (2018)	VEIN	EUROPEAN OROGENIC BELT - CENOZOIC/QUATERNARY / GERMANY / EIFEL / ROCKESKYLLERKOPF VOLCANIC COMPLEX	MANTLE XENOLITH	NOT GIVEN	Ti-rich in PC veins and werhlite	50.66	0.93	4.82	0.73	4.85	0.09	14.62	22.82			0.6	100.12	84.3122	3988.55	61.9	6621	209	52		273.9		178	13.83	171.27	0.87	7.44	22.95		24.37	5.69	1.66		0.72	3.72	0.57	1.35	0.17	1.04	0.14	7.96		1.00459
samp. MM262	1998	[8052] WITT-EICKSCHEN G. (1998)	COMPOSITE MANTLE XENOLITH	EUROPEAN OROGENIC BELT - CENOZOIC/QUATERNARY / GERMANY / EIFEL / MEERFELDER MAAR	MANTLE XENOLITH	PERIDOTITE, XENOLITH	Ti-rich in PC veins and werhlite	54.31	0.35	2.63	0.24	3.58	0.17	16.78	21.32			0.9	100.28	89.3124	2141.07		2098.25						189	8.35	46.4	0.27	11.1	29	4.11	17.7	3.56	0.98	2.84	0.46	2.54	0.4	1.03		0.81	0.1	0.78		0.403738
samp. MM262	1998	[8052] WITT-EICKSCHEN G. (1998)	COMPOSITE MANTLE XENOLITH	EUROPEAN OROGENIC BELT - CENOZOIC/QUATERNARY / GERMANY / EIFEL / MEERFELDER MAAR	MANTLE XENOLITH	PERIDOTITE, XENOLITH	Ti-rich in PC veins and werhlite	54.62	0.47	2.77	0.17	3.64	0.09	16.54	21.45			0.94	100.69	89.0126	2997.5		2817.65						149	8.11	57.8	0.14	9.18	24.4	3.42	15	3.24	0.94	3.34	0.42	2.24	0.36	1.08		0.75	0.11	1.9		0.572668
samp. 1214	1993	[8224] WITT-EICKSCHEN G. (1993)	VEIN IN SPINEL PERIDOTITE XENOLITH	EUROPEAN OROGENIC BELT - CENOZOIC/QUATERNARY / GERMANY / EIFEL / DREISER WEIHER	PLUTONIC ROCK	HORNBLENDITE	Ti-rich in PC veins and werhlite												0														10.95	35.2		29.5	7.11	2		0.78					2	0.17
samp. 1251V	1993	[8224] WITT-EICKSCHEN G. (1993)	VEIN IN SPINEL PERIDOTITE XENOLITH	EUROPEAN OROGENIC BELT - CENOZOIC/QUATERNARY / GERMANY / EIFEL / DREISER WEIHER	PLUTONIC ROCK	HORNBLENDITE	Ti-rich in PC veins and werhlite												0														44.5	81		33	8	2.2		1.2					2.6	0.21
samp. 915	1993	[8224] WITT-EICKSCHEN G. (1993)	ANHYDROUS XENOLITH	EUROPEAN OROGENIC BELT - CENOZOIC/QUATERNARY / GERMANY / EIFEL / DREISER WEIHER	PLUTONIC ROCK	PYROXENITE, CLINOPYROXENE	Ti-rich in PC veins and werhlite	51.68	0.52	6.1	1.09	3.26	0.09	17.04	18.97			0.85	99.6	90.3092	5110.49		3117.4										2.44	6.94		6.3	1.62	0.61		0.17					1.3	0.18
samp. 1233	1993	[8224] WITT-EICKSCHEN G. (1993)	ANHYDROUS XENOLITH	EUROPEAN OROGENIC BELT - CENOZOIC/QUATERNARY / GERMANY / EIFEL / DREISER WEIHER	PLUTONIC ROCK	PYROXENITE, CLINOPYROXENE	Ti-rich in PC veins and werhlite	51.7	0.65	6.04	1.21	3.84	0.01	16.22	19.09			1.05	99.81	88.2778	4870.94		3896.75										5.8	14		2.3	3	0.8		0.37					0.8	0.09
samp. 915	1993	[8224] WITT-EICKSCHEN G. (1993)	ANHYDROUS XENOLITH	EUROPEAN OROGENIC BELT - CENOZOIC/QUATERNARY / GERMANY / EIFEL / DREISER WEIHER	PLUTONIC ROCK	PYROXENITE, CLINOPYROXENE	Ti-rich in PC veins and werhlite	51.67	0.7	6.69	0.74	3.08	0.04	16.94	19.41			0.99	100.26	90.7457	5995		4196.5										2	7.7		7.6	2.13	0.7		0.3					0.78	0.1
samp. DW906	2003	[8634] WITT-EICKSCHEN G. (2003)	MAGMATIC VEIN	EUROPEAN OROGENIC BELT - CENOZOIC/QUATERNARY / GERMANY / EIFEL / DREISER WEIHER	PLUTONIC ROCK	HORNBLENDITE	Ti-rich in PC veins and werhlite	50.85	1.14	6.46	1	4.15	0.07	14.77	20.19			1.06	99.69	86.3859	6606.12		6474					0	112	10.2	48.9	0.47	4	13.7		11.6	3.1	0.98	2.82		2.08	0.36	0.87		0.62	0.08	1.71	0.12	0.563238
samp. DW328	2003	[8634] WITT-EICKSCHEN G. (2003)	MAGMATIC VEIN	EUROPEAN OROGENIC BELT - CENOZOIC/QUATERNARY / GERMANY / EIFEL / DREISER WEIHER	PLUTONIC ROCK	HORNBLENDITE	Ti-rich in PC veins and werhlite	51.87	0.5	6.66	0.42	4.78	0.11	16.32	18.84			1.03	100.53	85.89	6601.54		4291					0	71	8.4	23	0.28	1.92	6.8		6.5	1.95	0.65	1.96		1.57	0.28	0.69		0.51	0.07	0.9	0.04	0.446218
samp. DW324V	1998	[7815] WITT-EICKSCHEN G. (1998)	VEIN IN SPINEL PERIDOTITE XENOLITH	EUROPEAN OROGENIC BELT - CENOZOIC/QUATERNARY / GERMANY / EIFEL / DREISER WEIHER	PLUTONIC ROCK	CLINOPYROXENITE	Olivine clinopyroxenite vein	50.86	0.86	6.49	0.34	4.01	0.14	15.91	19.5			1.06	99.17	87.6141	5792.92		5155.7						85.7	8.29	32.8	0.78	2.97	10	1.75	9.27	2.61	0.89	2.63	0.42	2.27	0.45	1.17		0.96	0.13	1.35		0.460582
samp. DW287V	1998	[7815] WITT-EICKSCHEN G. (1998)	VEIN IN SPINEL PERIDOTITE XENOLITH	EUROPEAN OROGENIC BELT - CENOZOIC/QUATERNARY / GERMANY / EIFEL / DREISER WEIHER	PLUTONIC ROCK	CLINOPYROXENITE	Olivine clinopyroxenite vein	52.06	0.58	4.09	0.58	3.82	0.14	17.09	19.91			0.91	99.18	88.8595	5432.97		3477.1						62.8	4.89	19.6	0.63	2.72	8.32	1.36	6.53	1.88	0.64	1.69	0.29	1.55	0.26	0.7		0.63	0.08	1.2		0.386379
samp. DW915V	1998	[7815] WITT-EICKSCHEN G. (1998)	VEIN IN SPINEL PERIDOTITE XENOLITH	EUROPEAN OROGENIC BELT - CENOZOIC/QUATERNARY / GERMANY / EIFEL / DREISER WEIHER	PLUTONIC ROCK	CLINOPYROXENITE	Olivine clinopyroxenite vein	51.22	0.8	6.98	0.43	3.33	0.04	16.52	18.93			0.97	99.22	89.8423	6569.86		4796						53.4	7.19	26.3	0.46	1.99	6.97	1.22	7.46	2.26	0.73	1.85	0.32	1.95	0.35	0.87		0.91	0.11	1.3		0.44241
samp. DW327V	1998	[7815] WITT-EICKSCHEN G. (1998)	VEIN IN SPINEL PERIDOTITE XENOLITH	EUROPEAN OROGENIC BELT - CENOZOIC/QUATERNARY / GERMANY / EIFEL / DREISER WEIHER	PLUTONIC ROCK	CLINOPYROXENITE	Olivine clinopyroxenite vein	51.27	0.73	6.06	0.6	2.82	0	17.06	19.77			0.92	99.23	91.5152	5758.36		4376.35						77.5	7.38	28.4	1.03	3.06	9.36	1.49	8.05	2.2	0.76	2.21	0.34	1.92	0.31	0.8		0.76	0.09	1.36		0.466125
samp. DW325V	1998	[7815] WITT-EICKSCHEN G. (1998)	VEIN IN SPINEL PERIDOTITE XENOLITH	EUROPEAN OROGENIC BELT - CENOZOIC/QUATERNARY / GERMANY / EIFEL / DREISER WEIHER	PLUTONIC ROCK	CLINOPYROXENITE	Olivine clinopyroxenite vein	50.56	0.84	6.7	0.33	3.73	0.11	16.3	19.91			1.17	99.65	88.6249	5995		5035.8						93.3	9.3	40	0.72	4.04	12	1.94	10.2	2.76	0.84	2.78	0.39	2.36	0.42	1		0.92	0.11	1.59		0.520713
samp. DW171V	1998	[7815] WITT-EICKSCHEN G. (1998)	VEIN IN SPINEL PERIDOTITE XENOLITH	EUROPEAN OROGENIC BELT - CENOZOIC/QUATERNARY / GERMANY / EIFEL / DREISER WEIHER	PLUTONIC ROCK	CLINOPYROXENITE	Olivine clinopyroxenite vein	51.3	0.63	7.01	0.67	3.61	0.08	16.67	19.63			0.85	100.45	89.1691	5473.7		3776.85						62.4	9.66	24.1	0.93	2.83	7.82	1.27	6.96	1.99	0.69	2.17	0.36	2.16	0.43	1.23		1.18	0.16	1.04		0.44728
samp. DW328V	1998	[7815] WITT-EICKSCHEN G. (1998)	VEIN IN SPINEL PERIDOTITE XENOLITH	EUROPEAN OROGENIC BELT - CENOZOIC/QUATERNARY / GERMANY / EIFEL / DREISER WEIHER	PLUTONIC ROCK	CLINOPYROXENITE	Olivine clinopyroxenite vein	51.87	0.5	6.66	0.42	4.78	0.11	16.32	18.84			1.03	100.53	85.89	3996.67		2997.5						49.8	8.4	22.2	0.08	1.21	4.76	0.89	5.24	1.8	0.75	2.46	0.37	2.18	0.41	0.96		0.92	0.1	1.22		0.49928
[truncated: 2 more columns]

## Sheet: New cpx data EDS_WDS
Sample	Details	Source	LOCATION COMMENT	Type	SiO[2]	TiO[2]	Al[2]O[3]	FeO	MnO	MgO	CaO	NiO	Na[2]O	Total	xMg	Ti/Eu	Sc	Ti	V	Cr	Co	Ni	Rb	Sr	Y	Zr	Nb	La	Ce	Pr	Nd	Sm	Eu	Gd	Tb	Dy	Ho	Er	Tm	Yb	Lu	Hf	Ta	Zr/Zr*	Hf/Hf*	Ti/Ti*
96G3		SEM-EDS	Gees	Ti-rich PC veins and wehrlite	50.93	1.24	4.86	5.28	0.29	14.92	23.26		0.57	101.35	83.44	8231.05	100.092	9380.71	285.134	118.436	29.8672				7.84385	89.5834	0.682861	4.4292	16.2195	2.78019	14.6637	3.56253	1.13967	3.16453	0.376691	1.97119	0.327689	0.774996	0.0808852	0.538769	0.0676644	4.68509	0.199087	0.85609	1.62541	1.49845
96G3		SEM-EDS	Gees	Ti-rich PC veins and wehrlite	50.93	1.24	4.86	5.28	0.29	14.92	23.26		0.57	101.35	83.44	8790.95	98.9288	9345.31	282.862	114.21	29.7056				7.88097	88.5996	0.73489	4.44332	16.1008	2.89142	15.0205	3.35389	1.06306	3.09334	0.404861	2.10926	0.326774	0.7274	0.0809505	0.539365	0.0609442	4.58601	0.184456	0.862201	1.62019	1.49091
96G3		SEM-EDS	Gees	Ti-rich PC veins and wehrlite	50.93	1.24	4.86	5.28	0.29	14.92	23.26		0.57	101.35	83.44	8962.34	100.209	9415.72	286.886	115.983	29.5624				7.85964	89.5978	0.748112	4.46128	16.3421	2.79546	14.5276	3.57077	1.05059	3.21061	0.350715	2.09299	0.331525	0.809531	0.0842071	0.438674	0.0673635	4.64069	0.188149	0.859235	1.61566	1.62349
96G3		SEM-EDS	Gees	Ti-rich PC veins and wehrlite	48.83	1.52	6.43	5.41	0	13.19	23.4		0.55	99.33	81.3	7319.01	96.7984	8356.91	273.341	135.04	29.4252				7.90208	77.5452	0.637542	4.63303	16.6585	2.95258	14.9904	3.66553	1.14181	3.23755	0.407992	2.03534	0.336823	0.78264	0.0863414	0.550218	0.0737135	4.37613	0.155065	0.722557	1.48034	1.28148
96G3		SEM-EDS	Gees	Ti-rich PC veins and wehrlite	48.83	1.52	6.43	5.41	0	13.19	23.4		0.55	99.33	81.3	7940.15	95.5579	8385.89	273.933	131.871	29.6958				7.96402	77.3703	0.572992	4.60262	16.3113	2.86615	14.6672	3.51865	1.05614	3.10081	0.395959	1.964	0.327331	0.856694	0.0913189	0.536116	0.0698505	3.98481	0.169379	0.743884	1.39089	1.35723
96G3		SEM-EDS	Gees	Ti-rich PC veins and wehrlite	48.83	1.52	6.43	5.41	0	13.19	23.4		0.55	99.33	81.3	7968.62	96.2324	8369.12	273.872	131.282	29.0067				8.09528	77.9728	0.654955	4.5591	17.0571	2.95232	15.0705	3.42327	1.05026	3.07457	0.398707	2.10098	0.344496	0.839731	0.0872564	0.548158	0.0730964	4.076	0.158925	0.749811	1.42297	1.35361
96G3		SEM-EDS	Gees	Ti-rich PC veins and wehrlite	47.52	1.79	6.45	5.97	0	13.03	23.22		0.55	98.53	79.56	8593.19	99.3672	9489.42	287.652	121.709	29.6548				7.88216	89.2068	0.721231	4.41096	16.142	2.83091	14.8098	3.72508	1.1043	3.12787	0.394344	1.95349	0.339673	0.709669	0.0842212	0.488496	0.0721601	4.63142	0.191366	0.829562	1.56358	1.50505
96G3		SEM-EDS	Gees	Ti-rich PC veins and wehrlite	47.52	1.79	6.45	5.97	0	13.03	23.22		0.55	98.53	79.56	9104.68	98.9792	9436.05	285.961	117.815	29.2347				7.9624	90.0486	0.693741	4.55611	16.234	2.77442	14.7761	3.25177	1.0364	3.20501	0.378877	2.09096	0.339208	0.762174	0.092143	0.535218	0.0726369	4.55033	0.191693	0.897284	1.64607	1.57604
96G3		SEM-EDS	Gees	Ti-rich PC veins and wehrlite	47.52	1.79	6.45	5.97	0	13.03	23.22		0.55	98.53	79.56	9181.06	100.036	9498.66	287.082	120.351	29.6432				8.06238	90.0614	0.70774	4.54541	16.4359	2.86244	14.4745	3.62337	1.03459	3.20821	0.387103	2.28543	0.357347	0.850764	0.0985366	0.444589	0.0772706	4.71473	0.196437	0.858964	1.63247	1.57092
96G5		SEM-EDS	Gees	Ti-rich PC veins and wehrlite	51.19	0.4	3.39	5.04	0.19	15.31	22.78		0.73	99.03	84.41	4255.83	68.1846	3563.6	281.126	3249.47	28.3899				7.35152	33.1655	0.30499	4.36722	15.2287	2.56691	12.9173	2.88991	0.837346	2.61851	0.323551	1.68377	0.293132	0.69834	0.0959411	0.500595	0.0856659	1.16396	0.0653149	0.374932	0.477703	0.716564
96G5		SEM-EDS	Gees	Ti-rich PC veins and wehrlite	51.19	0.4	3.39	5.04	0.19	15.31	22.78		0.73	99.03	84.41	4404.96	69.4777	4035.81	276.054	3050.03	28.8967				7.61231	40.0686	1.03721	5.01665	16.7487	2.77606	14.2458	3.17689	0.916196	2.73022	0.36752	1.89374	0.32764	0.843672	0.0856305	0.582373	0.061583	1.47866	0.0965001	0.41139	0.551151	0.727923
96G5		SEM-EDS	Gees	Ti-rich PC veins and wehrlite	51.19	0.4	3.39	5.04	0.19	15.31	22.78		0.73	99.03	84.41	5020.66	68.7291	4765.57	255.73	2028.87	28.301				7.40676	50.4468	0.416796	4.69774	16.4319	2.83572	13.4542	2.97082	0.949192	2.82831	0.324128	1.79132	0.300609	0.702584	0.0990105	0.507331	0.0829513	2.22539	0.0799923	0.551138	0.882646	0.899226
96G5		SEM-EDS	Gees	Ti-rich PC veins and wehrlite	50.84	0.79	3.4	5.42	0.27	14.95	22.93		0.53	99.13	83.1	6887.75	63.7372	875.797	325.608	1769.56	21.345				2.71521	4.69018	0.464898	4.98897	8.4862	0.860321	2.82311	0.501233	0.127153	0.515649	0.0867811	0.536597	0.111156	0.318382	0.0392277	0.266741	0.0373787	0.153968	0.0296467	0.272332	0.324558	0.872605
96G5		SEM-EDS	Gees	Ti-rich PC veins and wehrlite	50.5	0.8	4	4.97	0.08	14.89	23.33		0.63	99.2	84.23	3827.19	79.5644	2922.77	348.964	1252.95	27.0131				7.18038	24.345	0.346582	4.37594	14.3131	2.29421	10.824	2.6309	0.763686	2.15802	0.301339	1.63286	0.274204	0.653782	0.0976544	0.523956	0.0590802	1.19041	0.0475448	0.315107	0.559368	0.637676
96G5		SEM-EDS	Gees	Ti-rich PC veins and wehrlite	50.5	0.8	4	4.97	0.08	14.89	23.33		0.63	99.2	84.23	4231.25	82.0319	3563.89	352.527	1343.32	26.5075				7.74545	29.1858	0.300327	4.38305	14.5594	2.41496	11.6682	2.84541	0.842278	2.65517	0.333629	1.81322	0.309836	0.737417	0.097791	0.56064	0.0815599	1.38761	0.0542422	0.349857	0.603868	0.703646
96G5		SEM-EDS	Gees	Ti-rich PC veins and wehrlite	50.5	0.8	4	4.97	0.08	14.89	23.33		0.63	99.2	84.23	6144.43	69.7167	2487.11	324.877	1378.45	25.3808				4.99261	16.7961	0.244961	3.32743	9.54872	1.4284	6.46432	1.4309	0.404775	1.32715	0.183471	1.06703	0.183706	0.530565	0.058756	0.391232	0.0555782	0.588704	0.0395621	0.381447	0.485375	0.955201
96G5		SEM-EDS	Gees	Ti-rich PC veins and wehrlite	50.14	0.91	4.46	5.27	0.25	14.48	23.36		0.49	99.36	83.05	3712.36	72.6724	3094.33	366.975	2168.53	28.3916				7.80618	26.349	0.266884	4.62872	15.7368	2.62923	12.5328	2.65183	0.833522	2.38319	0.3168	1.6922	0.323453	0.713294	0.0940205	0.548962	0.0769297	1.15825	0.0554569	0.315689	0.503793	0.630239
96G5		SEM-EDS	Gees	Ti-rich PC veins and wehrlite	50.14	0.91	4.46	5.27	0.25	14.48	23.36		0.49	99.36	83.05	3775.44	70.3673	3034.55	344.147	1782.07	28.5286				7.54339	24.7172	0.447228	4.81649	16.2271	2.61287	12.5212	2.61841	0.803759	2.27613	0.32771	1.58586	0.300121	0.761112	0.0865494	0.518906	0.0767035	0.944102	0.0515707	0.298162	0.413451	0.618836
96G5		SEM-EDS	Gees	Ti-rich PC veins and wehrlite	50.14	0.91	4.46	5.27	0.25	14.48	23.36		0.49	99.36	83.05	4352.43	70.4099	3226.31	336.895	2229.89	28.5358				7.1596	24.8465	0.231928	4.57661	14.9093	2.44758	11.3778	2.5005	0.741265	2.11137	0.284154	1.75749	0.283721	0.800536	0.0900342	0.524099	0.0842096	1.00144	0.0403565	0.321749	0.470791	0.735752
96G6		SEM-EDS	Gees	Ti-rich PC veins and wehrlite	54.88	0.07	0.99	3.23	0.08	17.77	21.72		0.81	99.55	90.75	2402.73	39.6021	114.596	129.014	3377.87	25.1669				1.02808	0.623575	0.203742	2.56555	3.95971	0.291491	0.805135	0.128774	0.0476941	0.188477	0.0228194	0.159638	0.0429854	0.149014	0.0166381	0.111812	0.021913	0.0165591	0.00195057	0.133763	0.128954	0.363559
96G6		SEM-EDS	Gees	Ti-rich PC veins and wehrlite	54.88	0.07	0.99	3.23	0.08	17.77	21.72		0.81	99.55	90.75	2402.73	39.6021	114.596	129.014	3377.87	25.1669				1.02808	0.623575	0.203742	2.56555	3.95971	0.291491	0.805135	0.128774	0.0476941	0.188477	0.0228194	0.159638	0.0429854	0.149014	0.0166381	0.111812	0.021913	0.0165591	0.00195057	0.133763	0.128954	0.363559
96G6		SEM-EDS	Gees	Ti-rich PC veins and wehrlite	54.88	0.34	0.99	3.23	0.08	17.77	21.72		0.81	99.82	90.75	2065.01	48.9003	1710.07	222.038	8937.32	29.5791				7.59779	13.5788	0.466432	11.6204	37.5757	5.24114	21.0817	3.36974	0.82812	2.5067	0.298844	1.56063	0.281956	0.723237	0.0751034	0.596443	0.0935749	0.445796	0.0238238	0.111276	0.132627	0.359779
96G6		SEM-EDS	Gees	Ti-rich PC veins and wehrlite	54.88	0.35	0.99	3.23	0.08	17.77	21.72		0.81	99.83	90.75	2097.38	40.5312	120.002	130.216	3470.37	25.1971				1.14312	0.867789	0.17928	3.40548	6.08272	0.488634	1.41853	0.209754	0.0572153	0.207262	0.0224458	0.21004	0.0412114	0.156126	0.0181062	0.125875	0.0160849	0.0121305		0.109883	0.0557634	0.350473
96G6		SEM-EDS	Gees	Type 1a	54.88	0.07	0.99	3.23	0.08	17.77	21.72		0.81	99.55	90.75	1048	39.7444	501.154	151.426	3470.34	24.0707				4.60907	8.07627	0.267412	16.9822	42.239	4.78647	16.1435	1.8306	0.4782	1.39883	0.155098	0.83185	0.15833	0.413857	0.0615715	0.376683	0.0543782	0.218369	0.0139647	0.102614	0.100726	0.192598
96G6		SEM-EDS	Gees	Type 1a	54.88	0.07	0.99	3.23	0.08	17.77	21.72		0.81	99.55	90.75	1260.92	38.6859	189.56	128.608	3345.72	24.2993				2.03663	2.37488	0.234631	7.50413	17.3702	1.76537	5.25772	0.686939	0.150334	0.488663	0.0603544	0.349283	0.0737553	0.225411	0.0241817	0.154264	0.0250489	0.0458829	0.00505424	0.0863131	0.0605396	0.208282
96G6		SEM-EDS	Gees	Type 1a	54.88	0.07	0.99	3.23	0.08	17.77	21.72		0.81	99.55	90.75	1392.63	43.4816	553.338	168.882	4585.88	31.4809				3.44518	7.90391	0.166258	13.7718	35.1012	3.89474	12.0945	1.58294	0.397333	0.972439	0.0927657	0.624894	0.115487	0.326692	0.04129	0.304178	0.0383886	0.150028	0.00568319	0.12477	0.0859791	0.301654
96G6		SEM-EDS	Gees	Type 1a	53.75	0.19	1.15	3.57	0.15	17.57	20.82		0.88	98.08	89.77	360.937	45.3239	483.254	192.953	6182.63	29.2845				12.6521	20.6538	0.217343	21.0879	65.3703	8.89625	35.5841	5.17374	1.33889	3.84186	0.421014	2.35214	0.443693	1.14387	0.159314	0.927927	0.133087	0.420733	0.00587762	0.105139	0.077754	0.0673666
96G6		SEM-EDS	Gees	Type 1a	53.75	0.19	1.15	3.57	0.15	17.57	20.82		0.88	98.08	89.77	385.405	45.1806	503.889	196.836	6704.82	29.435				12.3299	18.9698	0.23164	23.5982	68.4601	9.08905	35.0987	5.34783	1.30743	3.64488	0.397103	2.30825	0.43113	1.2048	0.154749	0.955612	0.145044	0.433512	0.0183922	0.0956362	0.079344	0.0731922
96G6		SEM-EDS	Gees	Type 1a	54.74	0.24	1.19	3.24	0.26	17.73	21.13		0.89	99.42	90.7	604.728	46.0572	902.364	215.77	6812.89	30.1315				13.6843	20.1737	0.198681	19.9541	62.5087	8.79514	35.9273	5.75187	1.49218	4.43887	0.518219	2.81959	0.491538	1.30676	0.155892	0.995618	0.144713	0.614692	0.016531	0.0969308	0.107223	0.1074
96G6		SEM-EDS	Gees	Type 1a	54.74	0.24	1.19	3.24	0.26	17.73	21.13		0.89	99.42	90.7	898.012	50.3145	585.4	198.73	10959	30.1077				5.89798	11.4917	0.21315	15.678	42.5634	5.2245	18.8343	2.39752	0.651885	1.69165	0.177928	1.11341	0.198483	0.567042	0.0808497	0.410208	0.0599222	0.220412	0.0109634	0.11812	0.082248	0.179901
96G6		SEM-EDS	Gees	Type 1a	54.74	0.24	1.19	3.24	0.26	17.73	21.13		0.89	99.42	90.7	905.384	43.3228	771.922	192.767	6687.56	30.172				7.55384	14.3841	0.188421	17.0996	47.7358	6.0918	22.415	3.17476	0.852591	2.32494	0.266206	1.40026	0.263449	0.693136	0.105937	0.589145	0.0915199	0.494082	0.00983242	0.117775	0.146866	0.169583
98HW1		SEM-EDS	Gees	Ti-rich PC veins and wehrlite	52.97	0	2.31	4.76	0.14	15.95	22.96		0.44	99.53	85.66	1675.24	99.5596	1595.79	420.681	4299.95	36.578				10.1077	27.4714	0.412677	7.78375	25.4968	3.89717	17.5385	3.29863	0.952574	2.75858	0.373161	2.01726	0.402399	0.985274	0.161629	0.813994	0.132696	0.704143	0.0457481	0.249466	0.232137	0.280135
98HW1		SEM-EDS	Gees	Ti-rich PC veins and wehrlite	52.97	0	2.31	4.76	0.14	15.95	22.96		0.44	99.53	85.66	1915.77	87.0385	1987.15	422.058	4247.32	35.3111				10.1705	22.3976	1.37896	7.19377	23.3937	3.65678	17.4721	3.37089	1.03726	2.97996	0.345713	2.13788	0.429133	1.10607	0.152047	0.875391	0.135855	0.687924	0.0762374	0.201581	0.224773	0.347311
98HW1		SEM-EDS	Gees	Ti-rich PC veins and wehrlite	52.94	0.07	2.35	5.04	0.15	15.72	21.79		0.73	98.79	84.76	3347.1	85.3869	561.868	330.666	2568.47	30.7258				1.94237	12.2365	0.311819	3.35684	6.64794	0.712413	2.60526	0.399414	0.167867	0.449767	0.055934	0.396651	0.0815657	0.18527	0.0199492	0.211121	0.0208318	0.228454	0.0236334	0.828541	0.561577	0.60688
98HW1		SEM-EDS	Gees	Ti-rich PC veins and wehrlite	52.94	0.07	2.35	5.04	0.15	15.72	21.79		0.73	98.79	84.76	3361.1	87.4565	556.755	331.086	2622.23	32.3141				1.93626	12.8836	0.326877	4.23924	9.06428	0.972334	3.21617	0.474718	0.165647	0.464067	0.0605656	0.379299	0.0596627	0.186206	0.0360559	0.231154	0.0329088	0.202945	0.0202656	0.720184	0.411849	0.581767
98HW1		SEM-EDS	Gees	Ti-rich PC veins and wehrlite	52.94	0.07	2.35	5.04	0.15	15.72	21.79		0.73	98.79	84.76	3664.57	86.2747	565.8	332.273	2587.73	30.8345				1.97238	12.0984	0.322992	3.26684	6.63533	0.695797	2.701	0.363671	0.154397	0.366249	0.0572513	0.410317	0.0655406	0.229841	0.030833	0.188977	0.0245225	0.217701	0.0216994	0.843152	0.550797	0.629855
98HW1		SEM-EDS	Gees	Ti-rich PC veins and wehrlite	52.86	0.2	2.38	4.87	0.2	15.66	22.17		0.67	99.01	85.15	3072.89	84.74	526.056	338.503	2477.88	31.615				2.17835	11.411	0.069591	1.42801	3.79268	0.512971	2.28812	0.400622	0.171193	0.360084	0.0562193	0.348692	0.078484	0.233201	0.0300356	0.193137	0.0336186	0.182744	0.0013324	0.823208	0.478611	0.561224
98HW1		SEM-EDS	Gees	Ti-rich PC veins and wehrlite	52.86	0.2	2.38	4.87	0.2	15.66	22.17		0.67	99.01	85.15	3106.36	84.4571	528.34	336.499	2476.67	31.1898				2.15537	11.3017	0.0643036	1.42183	3.86188	0.50512	2.30158	0.418004	0.170083	0.414711	0.062703	0.438703	0.0934966	0.204751	0.0320921	0.221474	0.0375132	0.18821		0.795853	0.481157	0.535462
98HW1		SEM-EDS	Gees	Ti-rich PC veins and wehrlite	52.86	0.2	2.38	4.87	0.2	15.66	22.17		0.67	99.01	85.15	3563.24	85.0006	537.931	336.412	2484.94	30.1512				2.0647	11.6308	0.164716	1.80119	3.99343	0.523553	2.00174	0.353842	0.150967	0.459563	0.0598799	0.380179	0.0860307	0.210779	0.0356804	0.16997	0.0328516	0.184155	0.0106383	0.95454	0.548683	0.592155
98HW1		SEM-EDS	Gees	Type 1a	52.97	0	2.31	4.76	0.14	15.95	22.96		0.44	99.53	85.66	1123.42	112.576	856.465	362.119	2559.83	36.9102				7.89924	22.1378	1.10739	8.24973	25.0689	3.60206	15.2742	2.60162	0.762372	2.25162	0.261935	1.52351	0.28718	0.814502	0.122559	0.745645	0.0864821	0.418117	0.0684454	0.242565	0.16632	0.200595
98HW3		SEM-EDS	Gees	Ti-rich PC veins and wehrlite	54.49	0.25	1.82	4.34	0.37	17.03	21.92		1.16	101.38	86.97	1564.57	56.6534	1832.33	196.294	5707.35	26.4144				14.8645	18.8527	1.32141	6.93747	21.7628	3.23293	14.506	3.16421	1.17114	3.23855	0.478448	2.94883	0.592245	1.56512	0.189974	1.25594	0.193244	0.653378	0.00683811	0.192203	0.241828	0.256195
98HW3		SEM-EDS	Gees	Ti-rich PC veins and wehrlite	52.91	0.31	2.29	3.3	0.11	16.85	23.27		0.71	99.75	89.68	2112.2	45.7665	2642.53	186.067	4558.95	27.0369				15.2474	36.5867	1.38175	7.18269	22.9192	3.73652	17.1727	3.99805	1.25108	3.7827	0.547776	3.19524	0.56769	1.49831	0.18193	1.19895	0.153922	1.29642	0.11614	0.304981	0.392328	0.334092
98HW3		SEM-EDS	Gees	Ti-rich PC veins and wehrlite	52.91	0.31	2.29	3.3	0.11	16.85	23.27		0.71	99.75	89.68	2476.16	40.7291	3484.84	190.944	4711.33	26.7645				14.3557	62.0072	1.53873	7.91854	26.0385	4.1272	19.9061	4.57321	1.40736	4.21526	0.543562	3.09493	0.570377	1.51227	0.177387	1.14489	0.172432	2.20487	0.152673	0.448882	0.579465	0.417009
98HW3		SEM-EDS	Gees	Ti-rich PC veins and wehrlite	52.91	0.31	2.29	3.3	0.11	16.85	23.27		0.71	99.75	89.68	3624.03	42.6717	4900.61	193.523	4559.3	25.6454				11.0715	71.4803	1.54619	6.50955	22.9118	3.74171	19.0606	4.5196	1.35225	3.83423	0.506929	2.69159	0.458498	1.16482	0.133489	0.873142	0.110844	2.56193	0.181238	0.531938	0.692143	0.619494
98HW3		SEM-EDS	Gees	Ti-rich PC veins and wehrlite	51.42	0.85	2.84	4.36	0.42	16.01	23.28		0.64	99.82	86.2	5840.38	61.9937	7256.31	240.113	2970.62	28.5269				12.422	76.7013	1.87895	7.53999	23.5635	3.74382	18.1282	4.23817	1.24244	3.65918	0.515602	2.90621	0.46947	1.26435	0.135259	0.938216	0.135003	3.89622	0.1785	0.604406	1.11461	0.948879
98HW3		SEM-EDS	Gees	Ti-rich PC veins and wehrlite	51.42	0.85	2.84	4.36	0.42	16.01	23.28		0.64	99.82	86.2	5893.73	49.9491	8520.74	228.258	665.349	26.2947				10.7809	103.61	0.842424	5.87614	21.742	3.88588	20.205	4.80796	1.44573	4.37926	0.523927	2.60623	0.481554	1.04619	0.125579	0.722864	0.0938306	4.67095	0.204867	0.726078	1.18834	1.02468
98HW3		SEM-EDS	Gees	Ti-rich PC veins and wehrlite	52.27	0.85	2.84	4.36	0.42	16.01	23.28		0.64	100.67	86.2	4101.69	48.2441	5699.66	205.493	1565.38	27.4473				13.7094	65.2892	1.01483	10.2897	29.4361	4.27726	19.3157	4.13473	1.38959	4.11574	0.542746	3.12949	0.557967	1.41235	0.179564	1.03252	0.162789	3.09206	0.14385	0.504611	0.867593	0.686906
98HW3		SEM-EDS	Gees	Type 1a	54.71	0	1.7	4.96	0.26	16.64	20.61		1.36	100.24	85.09	420.366	44.4237	755.148	182.563	4703.33	29.6831				25.4019	40.5199	0.274053	18.555	50.4404	6.52191	26.4323	5.15529	1.79641	5.32705	0.752084	4.73304	0.929584	2.75586	0.33652	2.21037	0.343702	1.28235	0.013398	0.239755	0.27546	0.0679964
98HW3		SEM-EDS	Gees	Type 1a	54.71	0	1.7	4.96	0.26	16.64	20.61		1.36	100.24	85.09	632.758	33.8173	1041.51	127.27	2395.26	71.4159				23.0442	54.5786	1.23404	28.317	63.4545	7.28275	27.018	4.73425	1.64598	4.71195	0.660356	4.19654	0.857887	2.29096	0.343864	2.18309	0.29758	1.20681	0.0559757	0.333321	0.267567	0.104556
98HW3		SEM-EDS	Gees	Type 1a	54.71	0	1.7	4.96	0.26	16.64	20.61		1.36	100.24	85.09	1154.89	17.3176	696.85	65.8082	1184.51	28.5577				8.44466	21.0959	1.03471	15.7124	30.711	3.06741	10.091	1.59144	0.603392	1.88022	0.255072	1.58041	0.311113	0.948706	0.132078	0.824347	0.13086	0.382416	0.0296964	0.363605	0.239288	0.185908
98HW3		SEM-EDS	Gees	Type 1a	54.49	0.25	1.82	4.34	0.37	17.03	21.92		1.16	101.38	86.97	1309.02	48.2823	1892.14	191.623	5441.14	27.7154				17.9566	26.2887	1.53175	8.71328	27.5058	4.1609	18.6971	3.99254	1.44546	4.01906	0.632409	3.5637	0.678518	1.86344	0.238407	1.61005	0.215609	0.845063	0.0662438	0.210161	0.245259	0.207129
98MF01		SEM-EDS	Meerfelder Maar	Ti-rich PC veins and wehrlite	52.53	0.33	4.42	3.56	0	15.81	21.18		1.17	99	88.31	3752.67	54.1088	4110.78	208.377	5252.67	23.3496				10.0014	70.3754	0.268931	5.49051	17.3819	2.64539	12.9041	3.48436	1.09543	3.16201	0.414933	2.61562	0.40459	1.06433	0.153491	0.877416	0.112241	3.27478	0.0678104	0.72492	1.22463	0.638165
98MF01		SEM-EDS	Meerfelder Maar	Ti-rich PC veins and wehrlite	52.53	0.33	4.42	3.56	0	15.81	21.18		1.17	99	88.31	3879.72	54.4057	4148.96	211.404	5450.43	23.7297				10.2389	70.8191	0.269717	5.46021	17.3087	2.75882	13.1467	3.46304	1.0694	3.06784	0.390055	2.43786	0.446866	1.0886	0.112916	0.744963	0.112655	3.61876	0.0633609	0.724948	1.34484	0.672352
98MF01		SEM-EDS	Meerfelder Maar	Ti-rich PC veins and wehrlite	52.53	0.33	4.42	3.56	0	15.81	21.18		1.17	99	88.31	3985.56	54.18	4027.71	207.939	5218.7	23.9075				9.97543	68.6552	0.25082	5.31394	17.0595	2.72953	13.5689	3.1887	1.01057	3.02164	0.432422	2.35013	0.421141	1.09482	0.128488	0.786895	0.110304	3.17034	0.060103	0.72092	1.20858	0.63769
98MF01		SEM-EDS	Meerfelder Maar	Ti-rich PC veins and wehrlite	51.89	0.54	4.37	3.88	0.17	15.26	22.31		0.93	99.35	87.52	2783.56	56.0536	3268.55	204.743	6678.18	23.0285				11.1669	84.8302	0.220375	6.22808	20.7518	3.38549	16.2917	3.99283	1.17423	3.31266	0.462232	2.66424	0.420246	1.11254	0.141253	0.838391	0.124576	3.50616	0.068427	0.726475	1.09007	0.464342
98MF01		SEM-EDS	Meerfelder Maar	Ti-rich PC veins and wehrlite	51.89	0.54	4.37	3.88	0.17	15.26	22.31		0.93	99.35	87.52	2899.17	56.2411	3609.71	212.201	6543.97	22.7992				11.8913	93.5572	0.357199	6.56017	21.5928	3.44217	16.5511	3.70985	1.24508	3.57771	0.485715	2.69429	0.469101	1.17567	0.152622	0.935285	0.140607	3.73919	0.116198	0.824667	1.19656	0.485816
98MF01		SEM-EDS	Meerfelder Maar	Ti-rich PC veins and wehrlite	51.89	0.54	4.37	3.88	0.17	15.26	22.31		0.93	99.35	87.52	3030.79	55.8699	3537.26	210.487	6409.69	22.661				11.8134	92.7583	0.253688	6.49754	21.5802	3.44844	16.8166	3.91154	1.16711	3.68636	0.487304	2.55852	0.489197	1.28534	0.14197	0.860168	0.116857	3.88242	0.0986294	0.789956	1.20035	0.490909
98MF01		SEM-EDS	Meerfelder Maar	Ti-rich PC veins and wehrlite	52.73	0.65	3.96	4	0.35	16.05	21.73		0.93	100.4	87.22	4501.61	54.5917	4489.39	211.573	2789.01	24.0045				9.41457	56.8272	0.207069	4.67831	15.2059	2.47831	12.0359	3.01282	0.997285	3.31455	0.388182	2.21711	0.395992	0.878931	0.119331	0.587713	0.0944687	2.71163	0.0499559	0.651813	1.12915	0.755179
98MF01		SEM-EDS	Meerfelder Maar	Ti-rich PC veins and wehrlite	52.73	0.65	3.96	4	0.35	16.05	21.73		0.93	100.4	87.22	4664.93	54.5333	4512.32	211.56	2884.18	24.1479				9.382	57.1425	0.24252	4.80251	15.5484	2.44679	11.6199	3.29552	0.967285	3.15676	0.413926	2.22592	0.374884	0.953617	0.113324	0.640118	0.100193	2.66482	0.0604552	0.637808	1.07982	0.746365
98MF01		SEM-EDS	Meerfelder Maar	Ti-rich PC veins and wehrlite	52.73	0.65	3.96	4	0.35	16.05	21.73		0.93	100.4	87.22	4767.99	54.8319	4639.18	214.519	3064.62	24.3258				9.59009	58.8165	0.208447	4.88908	15.5856	2.55628	12.4473	3.05744	0.972985	2.8866	0.376174	2.20242	0.401308	0.944733	0.119838	0.671473	0.0985723	2.87476	0.0578837	0.658531	1.16851	0.802571
98MF01		SEM-EDS	Gees	Type 1a	52.44	0.63	3.76	3.67	0.05	16.04	22.04		1	99.63	88.14	796.797	72.1646	827.094	175.298	5230.71	25.3007				9.4586	40.4893	0.108053	8.50263	30.372	4.61626	20.7535	3.7876	1.03802	2.85576	0.367718	2.00431	0.346712	0.974516	0.124378	0.80799	0.119529	0.830683	0.0789773	0.315432	0.234939	0.140115
98MF01		SEM-EDS	Gees	Type 1a	52.44	0.63	3.76	3.67	0.05	16.04	22.04		1	99.63	88.14	1181.88	57.9687	1433.15	178.298	5685.38	24.7133				11.7221	56.7662	0.133529	7.16381	25.1699	3.93561	18.7817	4.01868	1.2126	3.60826	0.439752	2.76932	0.461218	1.22392	0.153504	0.896901	0.126574	1.49454	0.0306383	0.451309	0.431367	0.205409
98MF01		SEM-EDS	Gees	Type 1a	52.44	0.63	3.76	3.67	0.05	16.04	22.04		1	99.63	88.14	1351.17	52.9957	1636.99	179.637	7019.96	24.0172				11.8637	63.2869	0.151236	6.52419	22.6354	3.69934	17.7362	3.72729	1.21153	3.33296	0.452389	2.62416	0.490523	1.21424	0.162955	1.07073	0.131912	1.63105	0.0460511	0.537626	0.503022	0.231426
Baar 21		SEM-EDS	Baarley	Type 1a	53.65	0.38	1.94	4.18	0.32	16.47	22.62		1.12	100.68	87.01	617.654	31.0798	1495.15	237.836	5945.01	18.4808				18.3649	196.504	1.67154	10.7235	44.7349	7.83267	38.433	8.1482	2.42069	6.59638	0.844471	4.51053	0.793762	2.07063	0.266095	1.29066	0.204473	4.68017	0.329027	0.766976	0.663172	0.109449
Baar 21		SEM-EDS	Baarley	Type 1a	53.65	0.38	1.94	4.18	0.32	16.47	22.62		1.12	100.68	87.01	621.893	31.8424	1499.67	235.17	6060.06	20.5188				18.2322	189.726	2.0926	10.6096	43.3325	7.79808	36.8661	8.33839	2.41147	6.338	0.807112	4.52759	0.750914	1.95254	0.238086	1.45421	0.184428	4.48514	0.330772	0.747419	0.641457	0.112507
Baar 21		SEM-EDS	Baarley	Type 1a	53.65	0.38	1.94	4.18	0.32	16.47	22.62		1.12	100.68	87.01	648.58	31.1626	1530.08	241.75	6241.37	18.5961				18.7687	202.854	1.58041	10.3513	43.4759	7.65314	37.2142	8.41453	2.35912	6.73021	0.867074	4.65972	0.788802	2.02519	0.260953	1.40582	0.210801	4.94338	0.347512	0.791785	0.700489	0.11197
Baar14A		SEM-EDS	Baarley	Ti-rich PC veins and wehrlite	51.42	0.78	2.61	3.88	0.09	16.15	23.65		0.68	99.26	87.63	3508.61	66.008	4451.67	206.664	6661.09	20.3841				10.142	143.833	0.534047	6.33253	22.134	3.85676	19.6923	4.57746	1.26878	3.86521	0.465354	2.58387	0.431167	0.98711	0.121814	0.656434	0.0956058	5.95686	0.185554	1.04638	1.57327	0.606355
Baar14A		SEM-EDS	Baarley	Ti-rich PC veins and wehrlite	51.42	0.78	2.61	3.88	0.09	16.15	23.65		0.68	99.26	87.63	4066.13	62.5822	4755.33	193.613	7518.35	20.996				9.55128	132.511	0.523517	5.52696	20.0916	3.47777	18.2327	4.13604	1.1695	3.50807	0.442023	2.32928	0.415063	0.908944	0.107609	0.638754	0.0978176	5.18485	0.164658	1.05397	1.49715	0.692226
Baar14A		SEM-EDS	Baarley	Ti-rich PC veins and wehrlite	51.42	0.78	2.61	3.88	0.09	16.15	23.65		0.68	99.26	87.63	4304.58	62.3748	5255.31	187.787	5620.7	21.5571				9.38561	123.222	0.585856	5.13908	18.7923	3.29757	16.2981	3.97788	1.22086	3.55446	0.443394	2.32492	0.411781	0.865113	0.10858	0.630417	0.103489	5.50691	0.175054	1.05703	1.71499	0.747583
Baar14A		SEM-EDS	Baarley	Ti-rich PC veins and wehrlite	51.75	0.96	3.22	4.56	0.19	15.74	23.93		0.6	100.95	85.45	4865.13	58.904	4837.07	172.099	5164.98	24.3149				7.82961	101.024	0.409961	4.43507	16.1004	2.7514	14.651	3.45953	0.994232	3.03938	0.38847	1.88174	0.356191	0.773284	0.0971899	0.59831	0.067424	4.72069	0.142826	0.980113	1.66268	0.81461
Baar14A		SEM-EDS	Baarley	Ti-rich PC veins and wehrlite	51.75	0.96	3.22	4.56	0.19	15.74	23.93		0.6	100.95	85.45	5002.53	56.385	5611.28	185.96	3120.97	24.7327				9.07686	104.745	0.494136	5.24894	18.4769	3.16697	16.1108	4.06458	1.12169	3.38909	0.413835	2.37049	0.395447	0.879322	0.107118	0.584052	0.0810627	4.58188	0.163339	0.894044	1.41979	0.86199
Baar14A		SEM-EDS	Baarley	Ti-rich PC veins and wehrlite	51.75	0.96	3.22	4.56	0.19	15.74	23.93		0.6	100.95	85.45	5555.92	53.8858	5368.66	176.918	3865.3	24.9514				8.17253	81.0295	0.439066	4.74559	16.5497	2.90862	14.595	3.26209	0.966295	2.95029	0.404215	1.90024	0.332392	0.75977	0.0965452	0.577825	0.0792512	3.60246	0.124235	0.811124	1.30917	0.899072
Baar14A		SEM-EDS	Baarley	Ti-rich PC veins and wehrlite	51.21	1.23	3.54	4.61	0.13	15.51	23.83		0.6	100.66	85.13	3543.1	59.2345	2980.69	163.228	6865.16	22.4446				6.54324	38.9212	0.209906	4.01081	13.9678	2.45693	12.1508	2.68957	0.841266	2.33813	0.313968	1.57923	0.301001	0.679606	0.0778757	0.432163	0.0709949	1.06617	0.0342111	0.470257	0.467657	0.607012
Baar14A		SEM-EDS	Baarley	Ti-rich PC veins and wehrlite	51.21	1.23	3.54	4.61	0.13	15.51	23.83		0.6	100.66	85.13	4334.55	57.6526	4123.59	168.452	6642.7	23.2804				7.51857	63.6161	0.402736	4.28365	15.3647	2.74402	13.6385	3.31778	0.951331	2.7384	0.345348	1.74461	0.32239	0.739425	0.0768148	0.541198	0.069383	2.08287	0.0857169	0.653211	0.776429	0.752959
Baar14A		SEM-EDS	Baarley	Ti-rich PC veins and wehrlite	51.21	1.23	3.54	4.61	0.13	15.51	23.83		0.6	100.66	85.13	4635.08	62.2675	5479.32	189.704	2765.45	24.0284				9.10527	108.305	0.559055	5.35487	18.8387	3.20817	16.2026	3.95854	1.18214	3.45749	0.414524	2.20251	0.392477	0.950792	0.110489	0.587667	0.0858566	4.39188	0.167726	0.934078	1.37511	0.819232
MFM-V		EMPA-WDS	Meerfelder Maar	CAP vein	54.12	0.05	4.02	2.69		16.38	20.17		1.5	98.93	91.56	365.13	66.7899	829.854	209.752	7028.16	20.9979	305.428		282.98	18.6971	58.8619	1.44566	17.0613	57.2596	8.77133	40.2597	8.42469	2.27276	5.84281	0.805161	4.19133	0.815923	1.56336	0.248963	1.70057	0.209018	1.27786	0.162626	0.220757	0.173987	0.0642057
MFM-V		EMPA-WDS	Meerfelder Maar	CAP vein	53.02	0.09	4.17	3.07		16.27	20.05		1.45	98.12	90.43	408.763	69.4037	883.937	232.715	7648.12	21.3903	330.029		257.62	19.0981	43.9256	1.51677	17.2633	58.379	9.14649	42.4885	8.86669	2.16247	6.64722	0.877675	4.46808	0.752244	1.94006	0.255185	1.80807	0.212139	1.08731	0.234075	0.156313	0.14047	0.0671536
MFM-V		EMPA-WDS	Meerfelder Maar	CAP vein	53.07	0.1	4.32	2.96		16.33	19.93		1.53	98.24	90.77	361.511	68.56	783.737	225.831	6866.41	21.4281	332.058		248.152	18.0594	37.1536	1.55256	16.5182	56.9491	8.64603	38.3713	8.40131	2.16795	6.01564	0.709163	4.05209	0.676194	1.77297	0.233649	1.29544	0.192724	0.83115	0.183011	0.142928	0.116078	0.066155
MFM-V		EMPA-WDS	Meerfelder Maar	CAP vein	53.89	0.11	3.93	2.92		15.93	20.07		1.45	98.3	90.67	378.433	66.3605	747.466	209.521	7040.98	21.3685	335.705		291.729	19.1069	73.3054	1.32688	17.9879	58.7716	8.65551	40.3462	8.17466	1.97516	6.66117	0.869485	4.28511	0.708573	2.12196	0.245416	1.39424	0.196787	1.6524	0.19098	0.2788	0.228152	0.0596965
MFM-V		EMPA-WDS	Meerfelder Maar	CAP vein	53.06	0.13	4.45	2.97		16.15	19.89		1.49	98.14	90.65	318.906	70.1633	731.63	219.275	5476.7	21.115	325.07		259.744	18.7319	39.7171	1.33573	16.8292	58.3532	9.09536	40.8092	8.21076	2.29419	6.79487	0.790281	3.99167	0.710037	1.67162	0.217868	1.49331	0.170575	1.05611	0.155738	0.149865	0.144672	0.0568691
MFM-V		EMPA-WDS	Meerfelder Maar	CAP vein	53.18	0.13	4.46	3.06		15.98	19.88		1.57	98.26	90.31	406.55	67.8453	924.439	239.896	8230.53	20.4254	314.623		263.929	19.8579	44.1586	1.42151	18.0818	59.8501	9.2304	41.6838	8.17124	2.27386	7.07551	0.841209	4.66943	0.717217	2.04635	0.216618	1.55672	0.169408	0.927406	0.198614	0.165265	0.126005	0.0699574
MFM-V		EMPA-WDS	Meerfelder Maar	CAP vein	53.08	0.15	4.44	3.03		16.27	19.91		1.53	98.41	90.54	362.254	67.9623	941.809	232.825	7243.15	21.2969	313.563		256.888	19.9143	44.8394	1.44039	17.584	60.0339	9.23831	40.84	9.08472	2.59986	7.00364	0.852318	4.48203	0.840778	1.66171	0.269908	1.70419	0.222036	1.21872	0.261118	0.160788	0.158654	0.0662181
MFM-V		EMPA-WDS	Meerfelder Maar	CAP vein	53.32	0.15	4.35	2.93		16.21	19.92		1.52	98.4	90.8	369.793	64.3885	694.697	183.54	3773.77	19.2086	298.861		286.09	17.2032	48.062	1.48617	18.5373	57.9285	8.72688	38.5628	8.07273	1.87861	5.79531	0.692863	3.79026	0.635883	1.63554	0.184094	1.18746	0.189758	1.05563	0.195545	0.188148	0.150026	0.0637299
MFM-V		EMPA-WDS	Meerfelder Maar	CAP vein	53.14	0.16	4.27	3.05		16.16	20.16		1.52	98.46	90.44	353.755	66.6652	781.977	211.342	5612.61	20.8987	295.313		281.826	19.1891	64.7344	1.64717	16.824	56.5842	8.80189	39.9976	7.88081	2.21051	7.06198	0.808019	4.36343	0.789899	1.98236	0.228885	1.42018	0.140832	1.66923	0.178698	0.251841	0.235756	0.0612389
MFM-V		EMPA-WDS	Meerfelder Maar	CAP vein	53.14	0.16	4.31	2.95		16.06	20.04		1.57	98.23	90.65	360.366	67.7342	796.835	225.378	7593.36	21.0271	320.047		266.81	18.8877	46.4241	1.35654	17.4407	58.5448	8.87035	40.1403	8.834	2.21118	7.17413	0.814352	4.44957	0.728368	1.7855	0.197816	1.38277	0.206659	0.959367	0.189541	0.170282	0.12775	0.0621498
MFM-V		EMPA-WDS	Meerfelder Maar	CAP vein	53.84	0.16	3.75	2.81		16.04	20.56		1.48	98.64	91.06	319.408	64.747	617.301	202.152	7383.54	20.9267	333.708		277.769	17.4324	62.3979	0.963782	15.8459	53.1889	7.85246	34.6332	7.33381	1.93264	5.96982	0.762904	3.94656	0.621434	1.86651	0.180609	1.36092	0.157925	1.47469	0.079081	0.270428	0.232025	0.053208
MFM-V		EMPA-WDS	Meerfelder Maar	CAP vein	53.1	0.17	4.44	3.07		15.99	19.79		1.52	98.08	90.28	377.941	67.9882	855.426	234.64	5885.59	20.8735	321.818		251.04	18.8122	38.407	1.55681	17.5216	58.161	8.85499	40.9405	9.03675	2.26339	6.60784	0.765164	4.01726	0.719835	1.85235	0.27123	1.45717	0.177827	1.03521	0.202918	0.137918	0.134956	0.0680323
MFM-V		EMPA-WDS	Meerfelder Maar	CAP vein	53.48	0.19	3.71	3.04		15.97	20.54		1.37	98.3	90.35	334.57	66.0542	806.6	212.028	7254.31	22.0589	344.655		289.785	19.7299	75.1246	1.72829	17.0555	59.0192	8.89486	41.6963	9.17596	2.41085	7.02624	0.863614	4.64278	0.791828	2.07343	0.227492	1.51612	0.181831	1.76068	0.187025	0.265278	0.225711	0.0585063
MFM-V		EMPA-WDS	Meerfelder Maar	CAP vein	53.04	0.2	4.35	3.13		15.91	20		1.52	98.15	90.07	364.954	69.4883	855.284	228.329	7623.97	20.8146	328.807		252.108	19.1032	53.1039	1.46732	16.3679	56.2082	8.68076	41.5711	8.1588	2.34354	6.97579	0.8395	4.46981	0.813184	1.93206	0.223382	1.36934	0.159493	1.91622	0.196433	0.199164	0.260905	0.0638195
MFM-V		EMPA-WDS	Meerfelder Maar	CAP vein	53.23	0.2	4.41	3.11		16.01	19.7		1.49	98.15	90.17	368.29	65.8414	859.455	220.447	5353.4	21.3447	320.891		269.933	19.1346	47.4051	1.6677	18.25	59.0825	9.26816	41.2178	8.52755	2.33364	6.5215	0.769884	4.14377	0.749536	1.88772	0.214144	1.63274	0.168915	1.11805	0.187366	0.174648	0.149538	0.0671094
MFM-V		EMPA-WDS	Meerfelder Maar	CAP vein	53.07	0.22	4.43	3.12		16.26	19.91		1.56	98.57	90.3	341.095	66.5224	731.318	210.547	7705.37	21.0634	340.82		287.817	19.2302	73.5799	1.19007	17.2634	56.5593	8.59675	39.2586	8.0655	2.14403	6.52476	0.788479	4.27105	0.772687	2.03836	0.246455	1.56049	0.187236	1.79949	0.133089	0.285607	0.253579	0.0588689
Neun-013		SEM-EDS	Neunkirchen	Ti-rich PC veins and wehrlite	53.62	0.28	1.9	3.15	20.88	17.75	0.31	0.97	0.31	99.17	90.56	1976.98	58.3436	2300.74	237.772	8204.25	22.5384				9.19934	19.2287	0.256588	7.42194	24.3378	3.65399	17.9324	3.28863	1.16376	2.82654	0.36003	2.07243	0.366441	0.927893	0.111793	0.750435	0.0940098	0.610064	0.024033	0.172948	0.199203	0.372011
Neun-013		SEM-EDS	Neunkirchen	Ti-rich PC veins and wehrlite	53.32	0.34	2.57	3.03	0.21	17.47	21.38		1.05	99.37	90.75	1734.98	51.8858	2511.26	207.18	7731.39	22.0457				11.4469	33.9719	0.404621	8.40314	28.3492	4.5223	22.376	4.57352	1.44743	3.6983	0.480421	2.63495	0.420425	1.0462	0.147763	0.815395	0.120299	1.25071	0.0433197	0.231951	0.310018	0.31519
Neun-013		SEM-EDS	Neunkirchen	Ti-rich PC veins and wehrlite	53.32	0.34	2.57	3.03	0.21	17.47	21.38		1.05	99.37	90.75	1917.71	51.4566	2809.89	209.359	8008.51	21.9869				11.6208	37.6578	3.01801	8.95059	31.0924	4.49212	22.2664	5.02025	1.46523	3.79941	0.460862	2.57182	0.449968	1.15299	0.133317	0.835435	0.101512	1.28328	0.0606129	0.246014	0.304355	0.357883
Neun-013		SEM-EDS	Neunkirchen	Ti-rich PC veins and wehrlite	53.32	0.34	2.57	3.03	0.21	17.47	21.38		1.05	99.37	90.75	1954.81	54.0935	2785.34	224.364	9525.35	22.3302				11.7564	34.7943	0.631173	8.58789	29.217	4.61887	21.7185	4.77845	1.42487	3.94254	0.481144	2.73848	0.459745	1.16755	0.126275	0.808121	0.118039	1.511	0.0726265	0.235908	0.371924	0.352082
Neun-013		SEM-EDS	Neunkirchen	Ti-rich PC veins and wehrlite	52.98	0.42	2.23	3.31	0.2	17.32	22.04		0.97	99.47	89.9	1621.96	66.9025	1717.03	259.051	7776.28	22.7579				10.0023	14.9861	0.207107	8.23816	24.5661	3.66773	17.5282	3.24653	1.05861	2.57992	0.352616	2.00184	0.391502	1.06868	0.13274	0.879917	0.119179	0.36217	0.018593	0.137216	0.120387	0.294135
Neun-013		SEM-EDS	Neunkirchen	Ti-rich PC veins and wehrlite	52.98	0.42	2.23	3.31	0.2	17.32	22.04		0.97	99.47	89.9	1742.04	77.0134	1740.64	293.232	9239.13	53.2828				9.98313	14.7906	0.902175	11.1529	26.1835	4.0606	18.1291	3.04705	0.999193	2.6342	0.364247	2.045	0.395655	1.01922	0.143929	0.849891	0.124286	0.434005	0.0506611	0.137452	0.146424	0.301978
Neun-013		SEM-EDS	Neunkirchen	Type 1a	53.62	0.28	1.9	3.15	20.88	17.75	0.31	0.97	0.31	99.17	90.56	1020.68	73.9051	640.222	263.848	6843.12	23.9165				6.0625	2.86798	0.161806	8.18639	20.8938	2.89338	11.9627	1.86646	0.627254	1.39111	0.167527	1.0832	0.222996	0.696848	0.103316	0.661912	0.0942249	0.104353		0.0419225	0.0553767	0.206708
Neun-013		SEM-EDS	Neunkirchen	Type 1a	53.62	0.28	1.9	3.15	20.88	17.75	0.31	0.97	0.31	99.17	90.56	1078.18	77.1271	719.601	294.861	11418.4	24.415				6.54705	2.92777	0.142608	8.21908	20.6159	2.82306	11.8622	2.00021	0.667424	1.34429	0.198934	1.19267	0.27055	0.723728	0.103704	0.773511	0.101367	0.141283		0.0415154	0.0727307	0.206693
Neun-017		SEM-EDS	Neunkirchen	Ti-rich PC veins and wehrlite	51.75	0.78	3.26	3.37	0.29	15.86	22.01		0.95	98.27	89.35	1583.52	58.1735	2623.47	341.135	14788.1	25.4074				16.454	34.7564	0.363279	8.55981	30.7346	5.24098	25.6361	5.24498	1.65674	4.86472	0.637293	3.41794	0.6696	1.7292	0.214124	1.34894	0.207648	1.30438	0.0338213	0.207028	0.282068	0.267221
Neun-017		SEM-EDS	Neunkirchen	Ti-rich PC veins and wehrlite	52.6	0.78	3.26	3.37	0.29	16.62	22.45		0.95	100.32	89.35	1583.52	58.1735	2623.47	341.135	14788.1	25.4074				16.454	34.7564	0.363279	8.55981	30.7346	5.24098	25.6361	5.24498	1.65674	4.86472	0.637293	3.41794	0.6696	1.7292	0.214124	1.34894	0.207648	1.30438	0.0338213	0.207028	0.282068	0.267221
Neun-017		SEM-EDS	Neunkirchen	Ti-rich PC veins and wehrlite	52.6	0.78	3.26	3.37	0.29	16.62	22.45		0.95	100.32	89.35	1591.98	53.2921	2514.44	323.494	11699.2	23.523				16.7115	37.0494	0.429987	9.24206	32.1011	5.41397	25.8736	5.74106	1.57945	5.13647	0.640904	3.89551	0.632694	1.79471	0.222066	1.22502	0.201276	1.278	0.0529346	0.209966	0.262938	0.261567
Neun-017		SEM-EDS	Neunkirchen	Ti-rich PC veins and wehrlite	52.6	0.78	3.26	3.37	0.29	16.62	22.45		0.95	100.32	89.35	2055.11	53.4645	4702.96	238.904	2622.07	20.221				19.0349	191.166	1.1603	12.6202	42.5163	7.20665	33.9288	8.02411	2.28842	6.32163	0.82258	4.57794	0.817821	1.7432	0.218365	1.34954	0.179857	6.92574	0.369319	0.800241	1.05252	0.35876
Neun-017		SEM-EDS	Neunkirchen	Ti-rich PC veins and wehrlite	51.35	1.06	4.64	3.48	0.2	15.76	23.31		0.73	100.53	88.51	2582.59	64.8556	3864.68	275.123	7939.38	21.0749				13.4717	43.3729	1.14931	8.69587	25.0979	4.51448	20.3426	4.24743	1.49644	3.97833	0.511974	3.08294	0.587606	1.38443	0.176376	0.995402	0.146032	1.69447	0.128242	0.322289	0.457103	0.462115
Neun-017		SEM-EDS	Neunkirchen	Ti-rich PC veins and wehrlite	51.35	1.06	4.64	3.48	0.2	15.76	23.31		0.73	100.53	88.51	4765.92	72.0946	4948.19	207.757	6643.21	21.8818				8.62712	35.2508	0.739827	5.68673	18.7125	2.97283	14.2713	3.0937	1.03825	2.91631	0.401321	2.17909	0.333449	0.844096	0.101594	0.526495	0.0984417	1.49463	0.0914261	0.366431	0.564041	0.802307
Neun-017		SEM-EDS	Neunkirchen	Ti-rich PC veins and wehrlite	51.35	1.06	4.64	3.48	0.2	15.76	23.31		0.73	100.53	88.51	6055.57	75.2325	7149.58	213.777	6452.67	21.888				9.57353	70.4648	1.02057	6.44549	21.5187	3.57683	17.2834	4.4588	1.18066	3.31181	0.40805	2.34942	0.351939	1.03958	0.109573	0.675765	0.086726	2.78	0.183121	0.554423	0.794086	1.07808
Neun-017		SEM-EDS	Neunkirchen	Ti-rich PC veins and wehrlite	49.99	1.31	4.78	3.85	0.33	15.2	23.51		0.55	99.52	87.04	2380.88	51.6324	4549.92	217.828	5428.08	21.0013				15.6527	166.709	0.970051	9.72388	33.3592	5.44592	26.9614	6.2657	1.91103	5.14864	0.676247	3.80282	0.525781	1.68047	0.203415	1.1804	0.169566	5.44493	0.298974	0.885925	1.05047	0.418897
Neun-017		SEM-EDS	Neunkirchen	Ti-rich PC veins and wehrlite	49.99	1.31	4.78	3.85	0.33	15.2	23.51		0.55	99.52	87.04	2439.45	49.8151	4470.14	216.309	5365.51	20.8866				15.878	172.943	0.926537	9.13302	33.1235	5.59536	27.4317	6.03049	1.83244	5.42424	0.667041	3.65714	0.665711	1.47125	0.195078	1.21359	0.172432	5.32676	0.310059	0.92874	1.0385	0.423175
Neun-017		SEM-EDS	Neunkirchen	Ti-rich PC veins and wehrlite	49.99	1.31	4.78	3.85	0.33	15.2	23.51		0.55	99.52	87.04	4960.77	61.2493	6207.53	220.034	6359.55	21.4698				10.4051	71.0433	0.69969	7.01423	23.7657	3.89089	19.6504	4.7124	1.25132	3.66268	0.45246	2.62303	0.473752	1.09823	0.115343	0.759343	0.10487	3.23405	0.128829	0.509929	0.842727	0.863442
Neun-017		SEM-EDS	Neunkirchen	Ti-rich PC veins and wehrlite	50.24	1.32	5.11	4.21	0.29	15.32	23.75		0.49	100.73	86.09	5412.53	72.1621	6441.17	210.892	6255.99	38.1191				9.53119	68.213	0.820548	6.37004	21.9344	3.60466	17.9382	3.9495	1.19005	3.7156	0.416615	2.29014	0.419717	0.963883	0.108204	0.722637	0.107074	2.77213	0.140484	0.559758	0.825848	0.957426
Neun-017		SEM-EDS	Neunkirchen	Ti-rich PC veins and wehrlite	50.24	1.32	5.11	4.21	0.29	15.32	23.75		0.49	100.73	86.09	5774.51	81.4071	5611.1	181.813	6440	22.1549				8.30115	50.6199	0.698978	5.76328	18.5316	2.91086	14.0904	3.50221	0.971701	3.07392	0.316316	1.91288	0.386344	0.802763	0.0847692	0.5654	0.0723408	1.86025	0.0955512	0.497716	0.664027	1.05928
Neun-017		SEM-EDS	Neunkirchen	Ti-rich PC veins and wehrlite	50.24	1.32	5.11	4.21	0.29	15.32	23.75		0.49	100.73	86.09	6304.68	87.0614	6369.69	175.542	5082.57	22.2705				8.01692	51.3983	1.59481	7.06702	20.1281	3.16189	15.3725	3.49706	1.01031	2.80133	0.397638	1.93137	0.310805	0.808391	0.106846	0.415444	0.0571694	2.11791	0.159022	0.484193	0.724321	1.05181
Neun-022		SEM-EDS	Neunkirchen	Ti-rich PC veins and wehrlite	54.99	0.21	2.11	2.82	0.17	18.22	21.53		0.97	101.02	91.66	6798.67	74.6268	7999.19	286.134	361.765	29.1133				9.41701	75.872	0.670472	5.1921	18.816	3.08015	16.0213	4.1038	1.17658	3.53063	0.423847	2.27637	0.370688	0.990501	0.106438	0.750126	0.0986457	3.73924	0.121683	0.646297	1.15635	1.18555
Neun-022		SEM-EDS	Neunkirchen	Ti-rich PC veins and wehrlite	54.99	0.21	2.11	2.82	0.17	18.22	21.53		0.97	101.02	91.66	7536.07	79.5398	7479.55	264.513	286.92	27.7118				7.3075	53.7687	0.435271	3.76998	13.7091	2.3334	12.0444	3.08512	0.9925	2.69385	0.307841	1.95482	0.321921	0.728867	0.0909018	0.492827	0.06235	2.5856	0.10901	0.609248	1.0636	1.41624
Neun-022		SEM-EDS	Neunkirchen	Ti-rich PC veins and wehrlite	54.99	0.21	2.11	2.82	0.17	18.22	21.53		0.97	101.02	91.66	7669.21	89.923	7936.58	231.876	1965.94	28.1366				7.78712	61.7848	0.531738	4.45615	15.6232	2.64888	13.8436	3.25306	1.03486	3.05431	0.360687	2.01271	0.357449	0.878187	0.079615	0.532527	0.0663369	2.99771	0.0946203	0.635923	1.12013	1.35962
Neun-022		SEM-EDS	Neunkirchen	Type 1a	54.52	0.15	2.57	2.77	0.06	17.84	21.47		0.99	100.37	91.64	828.52	61.1636	1465.13	226.87	10853.4	21.2899				15.5331	14.566	0.424795	10.2038	39.1203	6.25735	29.2568	6.12364	1.76837	4.95882	0.612642	3.56176	0.612482	1.61097	0.205896	1.24795	0.179233	0.338883	0.0461524	0.075165	0.063486	0.147325
Neun-022		SEM-EDS	Neunkirchen	Type 1a	54.52	0.15	2.57	2.77	0.06	17.84	21.47		0.99	100.37	91.64	892.582	55.2083	1287.82	176.267	9299.25	21.0591				12.4585	18.448	0.392672	7.6961	28.5542	4.75011	22.2203	4.57898	1.44281	4.07902	0.474671	2.92079	0.504865	1.24808	0.143809	1.01137	0.137298	0.614379	0.0482261	0.126323	0.15273	0.162872
Neun-022		SEM-EDS	Neunkirchen	Type 1a	54.52	0.15	2.57	2.77	0.06	17.84	21.47		0.99	100.37	91.64	1115.18	60.9587	1556.19	207.187	9949.18	20.9243				13.2711	13.7097	0.304613	7.64036	29.2628	4.84166	24.5829	4.84285	1.39546	4.10717	0.526624	2.96782	0.513166	1.31571	0.162318	0.948997	0.145657	0.441818	0.0393657	0.0867868	0.101537	0.189996
Neun-022		SEM-EDS	Neunkirchen	Type 1a	53.5	0.23	2.21	3.05	0.37	18.06	20.87		0.92	99.21	90.97	1466.46	65.658	611.562	261.12	13322.5	26.2516				4.56406	2.62357	0.142862	6.67422	18.2177	2.06731	7.57683	1.06449	0.417032	0.941841	0.123327	0.717675	0.175549	0.437927	0.0754585	0.563985	0.0638351	0.129073		0.0638073	0.113964	0.282239
Neun-022		SEM-EDS	Neunkirchen	Type 1a	53.99	0.24	2.53	3.11	0.24	16.43	22.52		0.91	99.97	90.4	961.143	104.79	1980.9	308.365	10783	20.9172				18.4149	15.8322	0.982265	11.6774	44.9425	7.27381	32.9943	6.71262	2.06098	5.48242	0.72909	4.05715	0.740918	1.82163	0.227215	1.56315	0.201901	0.445802	0.144252	0.0734801	0.0751144	0.169131
Neun-022		SEM-EDS	Neunkirchen	Type 1a	53.99	0.24	2.53	3.11	0.24	16.43	22.52		0.91	99.97	90.4	1086.73	74.3471	1684.84	236.12	10906.7	22.3122				14.3029	11.7417	0.324618	8.50726	32.1274	5.09212	24.718	5.02883	1.55038	4.34761	0.606063	3.20024	0.561198	1.50582	0.166236	1.23689	0.163014	0.319276	0.0356105	0.0727416	0.071808	0.181916
Neun-022		SEM-EDS	Neunkirchen	Type 1a	53.99	0.24	2.53	3.11	0.24	16.43	22.52		0.91	99.97	90.4	1447.23	60.8584	1722.22	205.143	10663.1	22.5649				11.8009	10.9375	0.299431	6.87458	25.8201	4.15722	20.1864	4.28678	1.19001	3.41499	0.443583	2.56709	0.481497	1.28101	0.144031	1.00916	0.138896	0.362181	0.0294507	0.0812111	0.0976288	0.248093
Neun-022		SEM-EDS	Neunkirchen	Type 1a	53.99	0.24	2.53	3.11	0.24	16.43	22.52		0.91	99.97	90.4	1447.23	60.8584	1722.22	205.143	10663.1	22.5649				11.8009	10.9375	0.299431	6.87458	25.8201	4.15722	20.1864	4.28678	1.19001	3.41499	0.443583	2.56709	0.481497	1.28101	0.144031	1.00916	0.138896	0.362181	0.0294507	0.0812111	0.0976288	0.248093
Neun-023		SEM-EDS	Neunkirchen	Ti-rich PC veins and wehrlite	53.01	0.32	3.51	3.2	0.07	16.92	21.81		0.92	99.76	89.99	3373.97	108.572	2205.32	306.756	9502.7	25.8431				5.98832	10.3967	0.076193	4.17208	13.2309	1.94619	9.13351	2.07588	0.653627	1.78944	0.230874	1.44661	0.264323	0.641503	0.0905866	0.572578	0.067056	0.488288	0.00571035	0.164919	0.281192	0.594167
Neun-023		SEM-EDS	Neunkirchen	Ti-rich PC veins and wehrlite	53.01	0.32	3.51	3.2	0.07	16.92	21.81		0.92	99.76	89.99	4130.7	71.3807	2389.15	249.56	8796.53	25.189				5.42498	12.7185	8.33385	4.69882	15.0537	1.91849	9.01607	1.91898	0.57839	1.70054	0.226791	1.17644	0.203504	0.551542	0.0856901	0.407583	0.0797671	0.431209	0.0280648	0.211195	0.259951	0.690415
Neun-023		SEM-EDS	Neunkirchen	Ti-rich PC veins and wehrlite	53.01	0.32	3.51	3.2	0.07	16.92	21.81		0.92	99.76	89.99	4391.08	68.6648	2265.13	262.974	9618	24.7833				5.15176	11.2193	0.0811982	4.78596	14.261	2.00738	9.46227	1.91931	0.515848	1.64425	0.238173	1.2158	0.219565	0.527844	0.0792438	0.385719	0.0539444	0.491593	0.0130658	0.18184	0.289256	0.676356
Neun-023		SEM-EDS	Neunkirchen	Ti-rich PC veins and wehrlite	49.38	1.31	5.24	5.7	0.21	13.95	23.38		0.63	99.8	81.35	5007.53	71.9758	5415.88	227.973	1685.59	30.6464				9.41667	59.4026	0.618608	6.02754	19.5084	3.22961	15.9153	3.60642	1.08155	3.05652	0.40153	2.15401	0.375043	0.864477	0.113781	0.657022	0.0950338	2.46042	0.0657434	0.541569	0.814349	0.860155
Neun-023		SEM-EDS	Neunkirchen	Ti-rich PC veins and wehrlite	49.38	1.31	5.24	5.7	0.21	13.95	23.38		0.63	99.8	81.35	5297.91	58.3598	4967.07	213.604	634.363	30.886				7.74265	47.0298	0.551391	4.67275	16.0797	2.63254	12.5144	3.19144	0.937553	2.64411	0.355398	1.90332	0.303795	0.848968	0.095942	0.448835	0.0717238	1.8458	0.062746	0.514007	0.732373	0.900607
Neun-023		SEM-EDS	Neunkirchen	Ti-rich PC veins and wehrlite	49.38	1.31	5.24	5.7	0.21	13.95	23.38		0.63	99.8	81.35	9189.41	173.347	11492.9	149.954	2109.04	24.0661				10.6317	162.74	1.89887	8.60116	27.4806	4.5161	22.1255	5.19885	1.25067	4.15178	0.491169	2.61988	0.399478	1.07261	0.134575	0.628576	0.123328	7.58962	0.430354	1.04806	1.77446	1.53473
Neun-023		SEM-EDS	Neunkirchen	Type 1a	53.5	0.23	2.21	3.05	0.37	18.06	20.87		0.92	99.21	90.97	1452.74	78.105	631.264	308.319	12438.2	26.3793				5.07382	2.15768	0.0447411	10.6706	26.5488	2.91093	9.69731	1.57753	0.434534	1.05167	0.162756	0.940815	0.183707	0.548127	0.0738754	0.681911	0.0914367	0.0414181		0.0381036	0.0265535	0.248439
Neun-023		SEM-EDS	Neunkirchen	Type 1a	53.5	0.23	2.21	3.05	0.37	18.06	20.87		0.92	99.21	90.97	1474.51	68.7555	678.069	278.332	12784.4	25.6721				4.6861	2.5786	0.0168359	9.17297	22.9275	2.49993	8.82615	1.38632	0.459861	0.904435	0.140626	0.867475	0.213031	0.508251	0.0710101	0.525075	0.0787726	0.0640886		0.0509167	0.0459421	0.279073
Neun-033		SEM-EDS	Neunkirchen	Ti-rich PC veins and wehrlite	53.48	0.27	1.89	3	0.19	17.11	21.12		1.08	98.14	91.05	3789.64	94.5749	4660.96	264.223	7469.95	23.1857	112.244	15.8789		12.1033	28.949	1.44214	9.30972	28.8212	4.4041	20.1818	4.29063	1.22992	3.71941	0.441145	2.543	0.433257	1.20779	0.133635	0.842426	0.118728	1.23424	0.0963428	0.214876	0.332588	0.662271
Neun-033		SEM-EDS	Neunkirchen	Type 1a	54.19	0.24	1.49	2.83	0.21	17.72	23.2		0.95	100.83	91.42	866.649	76.9185	1360.29	278.426	10712.7	23.1844	5.3804	12.6895		17.2765	7.17788	0.370189	14.2421	45.1994	6.67056	29.9991	5.71525	1.56959	4.50336	0.577043	3.46174	0.666688	1.7184	0.221197	1.39327	0.194803	0.272016	0.0176937	0.0378633	0.0520918	0.149597
Neun-033		SEM-EDS	Neunkirchen	Type 1a	53.35	0.31	2.21	3.17	0.11	16.68	21.76		0.89	98.48	90.37	1008.56	75.2086	1266.5	228.238	7512.79	22.3244	1.00431	15.186		13.3503	9.8965	0.232702	9.47873	30.7428	4.68424	21.3188	4.30513	1.25574	3.74602	0.465212	2.98186	0.528358	1.36885	0.19093	1.1662	0.161086	0.460041	0.00983957	0.0713511	0.120412	0.173427
Neun-033		SEM-EDS	Neunkirchen	Type 1a	54.51	0.34	1.94	2.91	0.22	17.23	21.35		0.92	99.42	91.35	974.66	66.3426	1155.96	277.406	17614.7	26.8402	1.85056	31.7168		11.8777	4.62267	0.268505	9.23858	29.8335	4.4462	19.6638	3.90669	1.18601	3.02571	0.403284	2.47313	0.399782	1.31956	0.164859	1.04423	0.142968	0.174129	0.00606241	0.0364291	0.0498173	0.174937
Rud-3		SEM-EDS	Ruderbusch	Ti-rich PC veins and wehrlite	49.64	1.28	3.37	4.59	0.09	15.57	23.67		0.41	98.62	85.23	6801.31	85.9098	7989.46	284.899	97.1826	34.619	1.54512	26.5366		9.16287	100.003	0.689212	6.272	20.8065	3.44937	16.6917	3.86398	1.17469	3.22875	0.459777	2.02045	0.364086	0.878714	0.115179	0.615696	0.0924606	4.06824	0.134283	0.860083	1.27024	1.13781
Rud-3		SEM-EDS	Ruderbusch	Ti-rich PC veins and wehrlite	49.05	1.48	3.91	4.68	0.14	14.86	23.87		0.4	98.39	84.38	7205.07	79.6012	8487.44	283.246	146.785	33.5582	1.66585	24.6494		8.47473	100.631	0.718461	5.70154	19.4624	3.18455	16.0898	3.98437	1.17798	3.39401	0.400652	2.34832	0.357495	0.823478	0.100124	0.550544	0.083494	4.40102	0.178198	0.868103	1.3783	1.29304
Rud-3		SEM-EDS	Ruderbusch	Ti-rich PC veins and wehrlite	49.05	1.48	3.91	4.68	0.14	14.86	23.87		0.4	98.39	84.38	8235.16	146.764	13582.4	176.42	2709.77	24.3766	2.28339	17.8592		10.9901	193.921	5.2558	11.3175	35.7835	5.66213	26.1678	5.82501	1.64932	4.2677	0.505332	2.85171	0.446395	1.1145	0.113166	0.904372	0.105703	8.66539	0.783518	1.08489	1.75996	1.55714
Rud-7		SEM-EDS	Ruderbusch	Ti-rich PC veins and wehrlite	51.29	0.73	4.68	3.19	0.25	16.2	23.7		0.61	100.65	89.63	2266.49	114.679	2222.35	317.08	11710.3	19.5538	6.03847	6.93702		11.7833	9.54743	0.956992	10.2996	32.4339	4.40695	17.7795	3.16855	0.980521	2.60279	0.351525	2.2325	0.455559	1.30676	0.178986	1.05051	0.172272	0.392195	0.0418361	0.0878596	0.131026	0.396182
Rud-7		SEM-EDS	Ruderbusch	Ti-rich PC veins and wehrlite	51.29	0.73	4.68	3.19	0.25	16.2	23.7		0.61	100.65	89.63	3964.12	102.278	3928.24	325.535	13810.1	32.3685	22.5936	67.5194		9.66334	27.8484	7.09133	9.9382	30.5411	4.06575	17.3317	3.15833	0.990949	2.72654	0.362208	2.07482	0.372178	0.898848	0.116333	0.732176	0.104259	1.00155	0.321669	0.259983	0.339447	0.686251
Rud-7		SEM-EDS	Ruderbusch	Type 1a	53.76	0	2.29	2.54	0.1	17.25	22.65		0.98	99.57	92.03	1217.54	71.8737	993.971	192.592	5744.46	19.3933	1.38629	11.9014		8.69693	9.21789	1.06766	17.5392	39.3104	4.44438	15.9452	2.5396	0.816377	1.76948	0.254158	1.62369	0.352528	0.918943	0.123544	0.943618	0.114178	0.379255	0.0142711	0.100052	0.149445	0.228384
Rud-7		SEM-EDS	Ruderbusch	Type 1a	53.76	0	2.29	2.54	0.1	17.25	22.65		0.98	99.57	92.03	1390.61	74.6126	1095.47	208.376	6345.18	23.4031	23.4432	17.4767		8.71282	8.6496	1.30212	15.8988	38.1243	4.33944	16.216	2.3814	0.787763	1.89044	0.272638	1.7643	0.324055	0.825525	0.113606	0.776705	0.13405	0.405471	0.0101808	0.0961394	0.163614	0.2474
Rud-7		SEM-EDS	Ruderbusch	Type 1a	54.54	0.17	2.14	2.69	0.18	17.45	22.99		0.99	101.15	91.69	710.558	60.2496	342.368	128.439	3370.16	19.5833	5.07529	9.55333		6.11142	7.12787	0.179805	21.8636	38.3531	3.53855	10.814	1.25578	0.48183	1.08045	0.145457	1.10855	0.206217	0.710162	0.0974227	0.736235	0.102545	0.260932		0.133599	0.177552	0.135353
Rud-7		SEM-EDS	Ruderbusch	Type 1a	54.54	0.17	2.14	2.69	0.18	17.45	22.99		0.99	101.15	91.69	1199.69	72.5923	954.203	178.088	5799.9	18.6123	1.11436	9.71578		7.74781	10.6021	2.15776	21.2314	45.6775	4.73997	16.2651	2.28235	0.795376	1.53834	0.207359	1.43784	0.311113	0.844198	0.107506	0.772532	0.128371	0.500049	0.0365316	0.120189	0.205797	0.245914
Rud-7		SEM-EDS	Ruderbusch	Type 1a	54.54	0.17	2.14	2.69	0.18	17.45	22.99		0.99	101.15	91.69	1536.9	75.5337	1259.26	226.208	6128.38	20.5073	2.6748	10.6681		9.35984	11.3001	4.31664	21.8887	44.7091	4.80948	17.3774	2.44344	0.81935	1.95982	0.28792	1.76998	0.333913	1.01669	0.12766	0.898572	0.100736	0.402811	0.0547557	0.11978	0.155009	0.271353

## Sheet: amphibole
Year	CITATION	SAMPLE NAME	UNIQUE_ID	LOCATION	ROCK NAME	ROCK TEXTURE	SAMPLE COMMENT	Type	SiO2	TiO2	Al2O3	Cr2O3	MnO	FeO	NiO	MgO	CaO	Na2O	K2O	Total	P	Sc	Ti	Ti calc	V	Cr	Mn	Co	Ni	Ga	Rb	Sr	Y	Zr	Nb	Cs	Ba	La	Ce	Pr	Nd	Sm	Eu	Gd	Tb	Dy	Ho	Er	Tm
1994	[8622] WITT-EICKSCHEN G. (1994)	samp. W1307		EUROPEAN OROGENIC BELT - CENOZOIC/QUATERNARY / GERMANY / EIFEL / MEERFELDER MAAR/DREISER WEIHER	PERIDOTITE, SPINEL, XENOLITH	TABULAR OR MOSAIC EQUIGRANULAR	AMPHIBOLE-BEARING	Type 1a	44.48	0.59	12.95	2.01	0.02	4.77		17.77	10.29	3.45	1.13	97.46			3301.05									346	14.48	132	158		212	22.43	71.87	9.95	40.72	7.42	2.01	5.62	0.79	4.07	0.7	1.83
1994	[8622] WITT-EICKSCHEN G. (1994)	samp. W1317		EUROPEAN OROGENIC BELT - CENOZOIC/QUATERNARY / GERMANY / EIFEL / MEERFELDER MAAR/DREISER WEIHER	PERIDOTITE, SPINEL, XENOLITH	TABULAR OR MOSAIC EQUIGRANULAR	AMPHIBOLE-BEARING	Type 1a	44.38	0.89	13.39	2.47	0.03	3.59		18.23	10.78	3.26	1.17	98.19			4979.55									546	18.79	129	155		195	33.46	92.71	12.54	50.74	8.76	2.47	8.25	1.08	5.69	0.92	2.64
1994	[8622] WITT-EICKSCHEN G. (1994)	samp. W1332		EUROPEAN OROGENIC BELT - CENOZOIC/QUATERNARY / GERMANY / EIFEL / MEERFELDER MAAR/DREISER WEIHER	PERIDOTITE, SPINEL, XENOLITH	TABULAR OR MOSAIC EQUIGRANULAR	AMPHIBOLE-BEARING	Type 1a	44.25	0.59	13.71	1.84	0.1	4.21		17.75	10.76	3.16	1.21	97.58			3301.05									322	10.24	79.84	100		302	21.36	61.36	8.32	33.36	5.64	1.24	3.53	0.65	3.05	0.49	1.14
1994	[8622] WITT-EICKSCHEN G. (1994)	samp. W110		EUROPEAN OROGENIC BELT - CENOZOIC/QUATERNARY / GERMANY / EIFEL / MEERFELDER MAAR/DREISER WEIHER	PERIDOTITE, SPINEL, XENOLITH	TABULAR OR MOSAIC EQUIGRANULAR	AMPHIBOLE-BEARING	Type 1a	44.2	0.47	13.22	2.34	0.02	3.74		18.1	10.63	3.42	1.1	97.24			2629.65									403	14.68	55.39	123		210	28.18	81.36	11.04	47.12	8.44	2.2	8.2	0.97	5.01	0.71	1.94
1994	[8622] WITT-EICKSCHEN G. (1994)	samp. W211		EUROPEAN OROGENIC BELT - CENOZOIC/QUATERNARY / GERMANY / EIFEL / MEERFELDER MAAR/DREISER WEIHER	PERIDOTITE, SPINEL, XENOLITH	TABULAR OR MOSAIC EQUIGRANULAR	AMPHIBOLE-BEARING	Type 1a	44.49	0.36	13.35	2.03	0	4.06		18.24	10.64	3.28	0.91	97.36			2014.2									834	17.93	48.41	143		263	56.53	132	17	67.7	12.16	3.23	9.01	1.25	5.78	0.86	2.41
1994	[8622] WITT-EICKSCHEN G. (1994)	samp. W194		EUROPEAN OROGENIC BELT - CENOZOIC/QUATERNARY / GERMANY / EIFEL / MEERFELDER MAAR/DREISER WEIHER	PERIDOTITE, SPINEL, XENOLITH	TABULAR OR MOSAIC EQUIGRANULAR	AMPHIBOLE-BEARING	Type 1a	45.21	0.32	12.69	2.57	0	3.91		18.31	10.42	3.26	1.04	97.73			1790.4									797	14.71	48.13	172		201	34.11	93.17	12.09	50.32	8.82	2.87	8.12	1.04	5.24	0.78	1.42
1994	[8622] WITT-EICKSCHEN G. (1994)	samp. W1262		EUROPEAN OROGENIC BELT - CENOZOIC/QUATERNARY / GERMANY / EIFEL / MEERFELDER MAAR/DREISER WEIHER	PERIDOTITE, SPINEL, XENOLITH	TABULAR OR MOSAIC EQUIGRANULAR	AMPHIBOLE-BEARING	Type 1a	44.14	0.24	14.59	1.81	0.02	4.03		17.79	10.83	3.06	1.08	97.59			1342.8									494	15.1	32.2	120		482	42	111	13.1	49.4	6.7	1.27	5.14	0.71	3.7	0.75	2.28
1994	[8622] WITT-EICKSCHEN G. (1994)	samp. W766		EUROPEAN OROGENIC BELT - CENOZOIC/QUATERNARY / GERMANY / EIFEL / MEERFELDER MAAR/DREISER WEIHER	PERIDOTITE, SPINEL, XENOLITH	TABULAR OR MOSAIC EQUIGRANULAR	AMPHIBOLE-BEARING	Type 1a	44.28	0.52	14.68	1.93	0.01	3.73		17.92	11.2	3.08	1.21	98.56			2909.4									499	11.93	26.25	171		412	32.88	85.64	9.46	30.31	3.84	1.04	3.3	0.59	2.69	0.67	1.64
1998	[8052] WITT-EICKSCHEN G. (1998)	samp. MM248		EUROPEAN OROGENIC BELT - CENOZOIC/QUATERNARY / GERMANY / EIFEL / MEERFELDER MAAR	PERIDOTITE, XENOLITH		COMPOSITE MANTLE XENOLITH	Type 1a	44.17	0.47	12.55	2.88	0	3.9	0.12	18.01	10.72	3.38	1.22	97.42			2629.65								5.98	463	17.4	179	199		170	29.8	91.2	13.4	59	11.7	2.86	8	1.03	5.27	0.86	2.25
1998	[8052] WITT-EICKSCHEN G. (1998)	samp. MM307		EUROPEAN OROGENIC BELT - CENOZOIC/QUATERNARY / GERMANY / EIFEL / MEERFELDER MAAR	PERIDOTITE, XENOLITH		COMPOSITE MANTLE XENOLITH	Type 1a	45.08	0.34	13.78	2.43	0.01	3.76	0.04	18.37	10.64	3.31	1.05	98.81			1902.3								10.5	353	15	139	180		235	24.4	78.8	10.7	44	8.2	2.26	5.67	0.87	4.56	0.8	2.1
1998	[8052] WITT-EICKSCHEN G. (1998)	samp. MM332		EUROPEAN OROGENIC BELT - CENOZOIC/QUATERNARY / GERMANY / EIFEL / MEERFELDER MAAR	PERIDOTITE, XENOLITH		COMPOSITE MANTLE XENOLITH	Type 1a	44.43	0.32	13.95	1.81	0.01	4.4	0.17	17.93	10.78	3.32	1.1	98.22			1790.4								9.28	489	14.1	107	144		429	30.9	85.6	11.6	43.4	6.4	1.56	4.38	0.62	3.46	0.58	1.8
1998	[8052] WITT-EICKSCHEN G. (1998)	samp. MM262	165039	EUROPEAN OROGENIC BELT - CENOZOIC/QUATERNARY / GERMANY / EIFEL / MEERFELDER MAAR	PERIDOTITE, XENOLITH		COMPOSITE MANTLE XENOLITH	Type 1a	44.55	0.78	13.22	1.44	0.06	4.59	0	18.49	11.14	3.05	1.16	98.48			4364.1								9.04	262	9.28	41.9	68.7		262	20.7	55.4	7.06	26.6	4.62	1.28	3.98	0.51	2.74	0.51	1.53
1998	[8052] WITT-EICKSCHEN G. (1998)	samp. MM262	165039	EUROPEAN OROGENIC BELT - CENOZOIC/QUATERNARY / GERMANY / EIFEL / MEERFELDER MAAR	PERIDOTITE, XENOLITH		COMPOSITE MANTLE XENOLITH	Type 1a	43.79	0.24	14.28	1.78	0.07	4.04	0	17.81	11.15	3.37	1.16	97.69			1342.8								15	517	12.7	29.8	98.3		438	33.1	79.3	9.39	38.9	4.97	1.17	4.2	0.34	2.62	0.54	1.48
1998	[8052] WITT-EICKSCHEN G. (1998)	samp. MM262	165039	EUROPEAN OROGENIC BELT - CENOZOIC/QUATERNARY / GERMANY / EIFEL / MEERFELDER MAAR	PERIDOTITE, XENOLITH		COMPOSITE MANTLE XENOLITH	Type 1a	43.95	0.27	14.48	1.85	0.01	3.9	0	17.75	11.24	3.03	1.24	97.72			1510.65								17.5	494	13.7	29.3	109		482	32.3	85.5	10.1	38	5.16	1.37	3.96	0.54	2.85	0.58	1.76
1998	[8052] WITT-EICKSCHEN G. (1998)	samp. MM262	165039	EUROPEAN OROGENIC BELT - CENOZOIC/QUATERNARY / GERMANY / EIFEL / MEERFELDER MAAR	PERIDOTITE, XENOLITH		COMPOSITE MANTLE XENOLITH	Type 1a	44.31	0.3	14.31	1.56	0.08	4.67	0	18.14	11.11	3.08	1.17	98.73			1678.5								9.76	349	10.6	26.3	85.6		317	31.5	80.8	9.6	34.5	4.62	1.3	3.66	0.56	2.1	0.48	1.74
2003	[8634] WITT-EICKSCHEN G. (2003)	samp. DW211	150699	EUROPEAN OROGENIC BELT - CENOZOIC/QUATERNARY / GERMANY / EIFEL / DREISER WEIHER	MANTLE XENOLITH	NOT GIVEN	EQUIGRANULAR	Type 1a	44.49	0.36	13.35	2.03	0	4.06	0.12	18.24	10.64	3.28	0.91	97.48			1776								7.8	905	20.2	41.7	144		257	45.8	117		61.1	10.5	3	7		4.2	0.71	1.81
2003	[8634] WITT-EICKSCHEN G. (2003)	samp. MM766	168437	EUROPEAN OROGENIC BELT - CENOZOIC/QUATERNARY / GERMANY / EIFEL / MEERFELDER MAAR	MANTLE XENOLITH	NOT GIVEN	EQUIGRANULAR	Type 1a	44.28	0.52	14.68	1.93	0.01	3.73	0.12	17.92	11.2	3.08	1.21	98.68			2773								17.1	637	14	25.1	179		379	30.4	84		29.4	3.9	1.07	3		2.5	0.5	1.4
1996	[8229] O^CONNOR T. K. (1996)	samp. 4		EUROPEAN OROGENIC BELT - CENOZOIC/QUATERNARY / GERMANY / EIFEL / MEERFELDER MAAR	MANTLE XENOLITH	LHERZOLITE, AMPHIBOLE, XENOLITH	EQUIGRANULAR	Type 1a	44.28	0.53	12.69	2	0	3.79		18.58	11.43	3.01	1.32	97.63
1987	[8638] WITT G. (1987)	samp. 4		EUROPEAN OROGENIC BELT - CENOZOIC/QUATERNARY / GERMANY / EIFEL / DREISER WEIHER	NOT GIVEN	PORPHYROCLASTIC	MANTLE XENOLITH	Type 1a	44.72	0.24	12.51	2.17		3.71		18.48	10.73	3.38	1.04	96.98			1342.8
2003	[8634] WITT-EICKSCHEN G. (2003)	samp. MM271	165066	EUROPEAN OROGENIC BELT - CENOZOIC/QUATERNARY / GERMANY / EIFEL / MEERFELDER MAAR	PERIDOTITE, XENOLITH		NON-COMPOSITE MANTLE XENOLITH	Type 1a	44.24	0.94	12.8	2.51	0.01	4	0.09	18.03	10.32	3.59	1.01	97.54			5003								8.3	607	16.7	86	170		151	26.3	77.9		42.6	7	2	4.9		3.2	0.58	1.5
1989	[8376] WITT G. (1989)	samp. 1160		EUROPEAN OROGENIC BELT - CENOZOIC/QUATERNARY / GERMANY / EIFEL	MANTLE XENOLITH	NOT GIVEN	PORPHYROCLASTIC	Type 1a	45.72	0.56	12.58	0.86		4		18.32	12.04	2.65	0.21	96.94
1989	[8376] WITT G. (1989)	samp. 1160		EUROPEAN OROGENIC BELT - CENOZOIC/QUATERNARY / GERMANY / EIFEL	MANTLE XENOLITH	NOT GIVEN	PORPHYROCLASTIC	Type 1a	46.26	0.45	12.08	0.91		3.97		18.51	12.16	2.44	0.28	97.06
1987	[8638] WITT G. (1987)	samp. 4		EUROPEAN OROGENIC BELT - CENOZOIC/QUATERNARY / GERMANY / EIFEL / DREISER WEIHER	MANTLE XENOLITH	NOT GIVEN	PORPHYROCLASTIC	Type 1a	44.72	0.24	12.51	2.17		3.71		18.48	10.73	3.38	1.04	96.98
1989	[8376] WITT G. (1989)	samp. 1159		EUROPEAN OROGENIC BELT - CENOZOIC/QUATERNARY / GERMANY / EIFEL	MANTLE XENOLITH	NOT GIVEN	PORPHYROCLASTIC	Type 1a	45.55	0.18	12.78	1.52		4.14		18.32	12.05	2.52	0.28	97.34
2003	[8634] WITT-EICKSCHEN G. (2003)	samp. DW211	150699	EUROPEAN OROGENIC BELT - CENOZOIC/QUATERNARY / GERMANY / EIFEL / DREISER WEIHER	NOT GIVEN	EQUIGRANULAR	RECRYSTALLIZED	Type 1a	44.49	0.36	13.35	2.03	0	4.06	0.12	18.24	10.64	3.28	0.91	97.48			1776								7.8	905	20.2	41.7	144		257	45.8	117		61.1	10.5	3	7		4.2	0.71	1.81
2003	[8634] WITT-EICKSCHEN G. (2003)	samp. MM766	168437	EUROPEAN OROGENIC BELT - CENOZOIC/QUATERNARY / GERMANY / EIFEL / MEERFELDER MAAR	NOT GIVEN	EQUIGRANULAR	RECRYSTALLIZED	Type 1a	44.28	0.52	14.68	1.93	0.01	3.73	0.12	17.92	11.2	3.08	1.21	98.68			2773								17.1	637	14	25.1	179		379	30.4	84		29.4	3.9	1.07	3		2.5	0.5	1.4
2003	[8634] WITT-EICKSCHEN G. (2003)	samp. MM262	165039	EUROPEAN OROGENIC BELT - CENOZOIC/QUATERNARY / GERMANY / EIFEL / MEERFELDER MAAR	NOT GIVEN	EQUIGRANULAR	RECRYSTALLIZED	Type 1a	44.14	0.24	14.59	1.81	0.02	4.03	0.11	17.79	10.83	3.06	1.08	97.7			1466								21.9	568	14.8	22.1	100		452	36.2	91.4		38.7	5.5	1.4	3.6		2.6	0.51	1.43
1989	[8376] WITT G. (1989)	samp. DF84		EUROPEAN OROGENIC BELT - CENOZOIC/QUATERNARY / GERMANY / EIFEL / MEERFELDER MAAR	PERIDOTITE, XENOLITH		RECRYSTALLIZED	Type 1a	43.28	0.47	14.77	1.5		3.87		18.18	11.42	3.04	1	97.53			2629.65
1989	[8376] WITT G. (1989)	samp. DF80		EUROPEAN OROGENIC BELT - CENOZOIC/QUATERNARY / GERMANY / EIFEL / MEERFELDER MAAR	PERIDOTITE, XENOLITH		RECRYSTALLIZED	Type 1a	43.06	0.44	15.38	1.09		4.3		17.95	11.4	3.03	0.96	97.61			2461.8
1989	[8376] WITT G. (1989)	samp. 1A171		EUROPEAN OROGENIC BELT - CENOZOIC/QUATERNARY / GERMANY / EIFEL / DREISER WEIHER	PERIDOTITE, XENOLITH		RECRYSTALLIZED	Type 1a	44.72	0.24	12.51	2.17		3.71		18.48	10.73	3.38	1.04	96.98			1342.8
2005	[7770] BAN M. (2005)	samp. MM82	150921	EUROPEAN OROGENIC BELT - CENOZOIC/QUATERNARY / GERMANY / EIFEL / MEERFELDER MAAR	MANTLE XENOLITH	HARZBURGITE, SPINEL, XENOLITH	TABULAR EQUIGRANULAR	Type 1a	45.17	0.29	13.33	1.91	0.1	3.89	0.1	18.26	10.86	3.65	0.84	98.4
1989	[8376] WITT G. (1989)	samp. 1160		EUROPEAN OROGENIC BELT - CENOZOIC/QUATERNARY / GERMANY / EIFEL	NOT GIVEN	PORPHYROCLASTIC	XENOLITH	Type 1a	45.72	0.56	12.58	0.86		4		18.32	12.04	2.65	0.21	96.94			3133.2
1989	[8376] WITT G. (1989)	samp. 1160		EUROPEAN OROGENIC BELT - CENOZOIC/QUATERNARY / GERMANY / EIFEL	NOT GIVEN	PORPHYROCLASTIC	XENOLITH	Type 1a	46.26	0.45	12.08	0.91		3.97		18.51	12.16	2.44	0.28	97.06			2517.75
1989	[8376] WITT G. (1989)	samp. 1159		EUROPEAN OROGENIC BELT - CENOZOIC/QUATERNARY / GERMANY / EIFEL	NOT GIVEN	PORPHYROCLASTIC	XENOLITH	Type 1a	45.55	0.18	12.78	1.52		4.14		18.32	12.05	2.52	0.28	97.34			1007.1
1989	[8376] WITT G. (1989)	samp. 1159		EUROPEAN OROGENIC BELT - CENOZOIC/QUATERNARY / GERMANY / EIFEL	NOT GIVEN	PORPHYROCLASTIC	XENOLITH	Type 1a	46.22	0.15	12.59	1.25		4.03		18.66	11.95	2.49	0.44	97.78			839.25
1998	[8052] WITT-EICKSCHEN G. (1998)	samp. MM248		EUROPEAN OROGENIC BELT - CENOZOIC/QUATERNARY / GERMANY / EIFEL / MEERFELDER MAAR	MANTLE XENOLITH	PERIDOTITE, XENOLITH		Type 1a	44.17	0.47	12.55	2.88	0	3.9	0.12	18.01	10.72	3.38	1.22	97.42											5.98	463	17.4	179	199		170	29.8	91.2	13.4	59	11.7	2.86	8	1.03	5.27	0.86	2.25
1998	[8052] WITT-EICKSCHEN G. (1998)	samp. MM307		EUROPEAN OROGENIC BELT - CENOZOIC/QUATERNARY / GERMANY / EIFEL / MEERFELDER MAAR	MANTLE XENOLITH	PERIDOTITE, XENOLITH		Type 1a	45.08	0.34	13.78	2.43	0.01	3.76	0.04	18.37	10.64	3.31	1.05	98.81											10.5	353	15	139	180		235	24.4	78.8	10.7	44	8.2	2.26	5.67	0.87	4.56	0.8	2.1
1998	[8052] WITT-EICKSCHEN G. (1998)	samp. MM332		EUROPEAN OROGENIC BELT - CENOZOIC/QUATERNARY / GERMANY / EIFEL / MEERFELDER MAAR	MANTLE XENOLITH	PERIDOTITE, XENOLITH		Type 1a	44.43	0.32	13.95	1.81	0.01	4.4	0.17	17.93	10.78	3.32	1.1	98.22											9.28	489	14.1	107	144		429	30.9	85.6	11.6	43.4	6.4	1.56	4.38	0.62	3.46	0.58	1.8
2003	[8634] WITT-EICKSCHEN G. (2003)	samp. MM271	165066	EUROPEAN OROGENIC BELT - CENOZOIC/QUATERNARY / GERMANY / EIFEL / MEERFELDER MAAR	MANTLE XENOLITH	PERIDOTITE, XENOLITH		Type 1a	44.24	0.94	12.8	2.51	0.01	4	0.09	18.03	10.32	3.59	1.01	97.54			5003								8.3	607	16.7	86	170		151	26.3	77.9		42.6	7	2	4.9		3.2	0.58	1.5
2005	[13652] WITT-EICKSCHEN G.(2005) [GeoReM [1802] ]	samp. MM110	252478	EUROPEAN OROGENIC BELT - CENOZOIC/QUATERNARY / GERMANY / EIFEL / MEERFELDER MAAR	LHERZOLITE, SPINEL, XENOLITH			Type 1a	44.2	0.47	13.22	2.34	0.02	3.74		18.1	10.63	3.42	1.1	97.24	262	50.4	2922	2629.65	297	15785		37.4	854	33.6	12.3	550.9	20.5	64.1	157.2		260	28.5	86.6		51.4	9.48	2.61	6.69		4.1	0.71	1.8
2005	[13652] WITT-EICKSCHEN G.(2005) [GeoReM [1802] ]	samp. MM110	252478	EUROPEAN OROGENIC BELT - CENOZOIC/QUATERNARY / GERMANY / EIFEL / MEERFELDER MAAR	MANTLE XENOLITH	LHERZOLITE, SPINEL, XENOLITH		Type 1a	44.2	0.47	13.22	2.34	0.02	3.74		18.1	10.63	3.42	1.1	97.24	262	50.4	2922		297	15785		37.4	854	33.6	12.3	550.9	20.5	64.1	157.2		260	28.5	86.6		51.4	9.48	2.61	6.69		4.1	0.71	1.8
1995	[15315] IONOV D. A. (1995)	samp. 40-1	374085	EUROPEAN OROGENIC BELT - CENOZOIC/QUATERNARY / GERMANY / EIFEL	PERIDOTITE, AMPHIBOLE, XENOLITH			Type 1a	43.47	0.56	13.16	2.44		3.54		18.25	11.38	2.94	1.42	97.16		50.1	3133.2								13	607		45	143		372	36.3	95	11.4	43	7.13	2.1	4.7	0.65	3.26	0.6	1.5	0.2
1998	[8052] WITT-EICKSCHEN G. (1998)	samp. MM262	165039	EUROPEAN OROGENIC BELT - CENOZOIC/QUATERNARY / GERMANY / EIFEL / MEERFELDER MAAR	MANTLE XENOLITH	PERIDOTITE, XENOLITH		Type 1a	44.55	0.78	13.22	1.44	0.06	4.59	0	18.49	11.14	3.05	1.16	98.48											9.04	262	9.28	41.9	68.7		262	20.7	55.4	7.06	26.6	4.62	1.28	3.98	0.51	2.74	0.51	1.53
2005	[13652] WITT-EICKSCHEN G.(2005) [GeoReM [1802] ]	samp. DW211	150699	EUROPEAN OROGENIC BELT - CENOZOIC/QUATERNARY / GERMANY / EIFEL / DREISER WEIHER	LHERZOLITE, SPINEL, XENOLITH			Type 1a	44.49	0.36	13.35	2.03	0	4.06		18.24	10.64	3.28	0.91	97.36	228	56	1776	2014.2	386	13933		38.5	910	18.3	7.8	905.4	20.2	41.4	143.5		257	45.8	116.9		61.1	10.5	3.03	6.96		4.22	0.71	1.81
2005	[13652] WITT-EICKSCHEN G.(2005) [GeoReM [1802] ]	samp. DW211	150699	EUROPEAN OROGENIC BELT - CENOZOIC/QUATERNARY / GERMANY / EIFEL / DREISER WEIHER	MANTLE XENOLITH	LHERZOLITE, SPINEL, XENOLITH		Type 1a	44.49	0.36	13.35	2.03	0	4.06		18.24	10.64	3.28	0.91	97.36	228	56	1776		386	13933		38.5	910	18.3	7.8	905.4	20.2	41.4	143.5		257	45.8	116.9		61.1	10.5	3.03	6.96		4.22	0.71	1.81
1998	[8052] WITT-EICKSCHEN G. (1998)	samp. MM262	165039	EUROPEAN OROGENIC BELT - CENOZOIC/QUATERNARY / GERMANY / EIFEL / MEERFELDER MAAR	MANTLE XENOLITH	PERIDOTITE, XENOLITH		Type 1a	44.31	0.3	14.31	1.56	0.08	4.67	0	18.14	11.11	3.08	1.17	98.73											9.76	349	10.6	26.3	85.6		317	31.5	80.8	9.6	34.5	4.62	1.3	3.66	0.56	2.1	0.48	1.74
2005	[13652] WITT-EICKSCHEN G.(2005) [GeoReM [1802] ]	samp. MM766	168437	EUROPEAN OROGENIC BELT - CENOZOIC/QUATERNARY / GERMANY / EIFEL / MEERFELDER MAAR	LHERZOLITE, SPINEL, XENOLITH			Type 1a	44.28	0.52	14.68	1.93	0.01	3.73		17.92	11.2	3.08	1.21	98.56	290	58.5	2773	2909.4	468	17847		44.2	951	27.5	17.1	637.1	14	25.1	179.4		379	30.4	84		29.4	3.86	1.07	3.05		2.49	0.5	1.4
2005	[13652] WITT-EICKSCHEN G.(2005) [GeoReM [1802] ]	samp. MM766	168437	EUROPEAN OROGENIC BELT - CENOZOIC/QUATERNARY / GERMANY / EIFEL / MEERFELDER MAAR	MANTLE XENOLITH	LHERZOLITE, SPINEL, XENOLITH		Type 1a	44.28	0.52	14.68	1.93	0.01	3.73		17.92	11.2	3.08	1.21	98.56	290	58.5	2773		468	17847		44.2	951	27.5	17.1	637.1	14	25.1	179.4		379	30.4	84		29.4	3.86	1.07	3.05		2.49	0.5	1.4
2005	[13652] WITT-EICKSCHEN G.(2005) [GeoReM [1802] ]	samp. MM1266		EUROPEAN OROGENIC BELT - CENOZOIC/QUATERNARY / GERMANY / EIFEL / MEERFELDER MAAR	LHERZOLITE, SPINEL, XENOLITH			Type 1a	43.75	0.27	15.03	1.43	0.04	4.15		17.74	11.26	3.06	1.1	97.83	174	56.6	1804	1510.65	407	8737		42	965	7.4	24.4	473.4	15.7	19.5	89.4		648	38.4	68.6		18.4	2.37	0.73	2.05		2.37	0.52	1.54
2005	[13677] SHAW C. S. J. (2005)	samp. 98DW05		EUROPEAN OROGENIC BELT - CENOZOIC/QUATERNARY / GERMANY / EIFEL / DREISER WEIHER	LHERZOLITE, SPINEL, XENOLITH			Type 1a	43.81	0.92	13.4	2.15	0.09	4.01		18.11	10.85	3.42	0.9	97.66			5147.4
1996	[8229] O^CONNOR T. K. (1996)	samp. 1		EUROPEAN OROGENIC BELT - CENOZOIC/QUATERNARY / GERMANY / EIFEL / MEERFELDER MAAR	LHERZOLITE, AMPHIBOLE, XENOLITH	EQUIGRANULAR		Type 1a	42.97	0.68	13.82	2.28	0	3.83		18.44	11.1	3.22	1.41	97.75			3804.6
2005	[7770] BAN M. (2005)	samp. MM67		EUROPEAN OROGENIC BELT - CENOZOIC/QUATERNARY / GERMANY / EIFEL / MEERFELDER MAAR	LHERZOLITE, SPINEL, XENOLITH	TABULAR EQUIGRANULAR		Type 1a	43.31	0.59	13.78	2.15	0.06	3.68	0.13	18.13	11.04	3.25	1.37	97.49			3301.05
1993	[8224] WITT-EICKSCHEN G. (1993)	samp. 1262		EUROPEAN OROGENIC BELT - CENOZOIC/QUATERNARY / GERMANY / EIFEL / DREISER WEIHER	PLUTONIC ROCK	PERIDOTITE, SPINEL		Type 1a	43.56	0.58	13.72	1.65	0.03	4.87	0.12	17.57	10.97	3.04	1.27	97.38
1996	[8229] O^CONNOR T. K. (1996)	samp. 4		EUROPEAN OROGENIC BELT - CENOZOIC/QUATERNARY / GERMANY / EIFEL / MEERFELDER MAAR	LHERZOLITE, AMPHIBOLE, XENOLITH	EQUIGRANULAR		Type 1a	44.28	0.53	12.69	2	0	3.79		18.58	11.43	3.01	1.32	97.63			2965.35
2005	[7770] BAN M. (2005)	samp. MM82	150921	EUROPEAN OROGENIC BELT - CENOZOIC/QUATERNARY / GERMANY / EIFEL / MEERFELDER MAAR	HARZBURGITE, SPINEL, XENOLITH	TABULAR EQUIGRANULAR		Type 1a	45.17	0.29	13.33	1.91	0.1	3.89	0.1	18.26	10.86	3.65	0.84	98.4			1622.55
2005	[7770] BAN M. (2005)	samp. DW171	150922	EUROPEAN OROGENIC BELT - CENOZOIC/QUATERNARY / GERMANY / EIFEL / DREISER WEIHER	HARZBURGITE, SPINEL, XENOLITH	TABULAR EQUIGRANULAR		Type 1a	44.06	0.28	12.43	2.35	0.06	3.76	0.1	18.54	10.87	3.35	0.98	96.78			1566.6
1989	[8376] WITT G. (1989)	samp. 1A171		EUROPEAN OROGENIC BELT - CENOZOIC/QUATERNARY / GERMANY / EIFEL / DREISER WEIHER	MANTLE XENOLITH	PERIDOTITE, XENOLITH		Type 1a	44.72	0.24	12.51	2.17		3.71		18.48	10.73	3.38	1.04	96.98
1980	[8360] STOSCH H.-G. (1980)	samp. DF78		EUROPEAN OROGENIC BELT - CENOZOIC/QUATERNARY / GERMANY / EIFEL / MEERFELDER MAAR	PERIDOTITE, XENOLITH			Type 1a	43.17	0.18	14.81	1.47	0.05	4.07		18.37	11.55	3.17	0.9	97.74			1007.1
1994	[8622] WITT-EICKSCHEN G. (1994)	samp. W1310		EUROPEAN OROGENIC BELT - CENOZOIC/QUATERNARY / GERMANY / EIFEL / MEERFELDER MAAR/DREISER WEIHER	PERIDOTITE, SPINEL, XENOLITH	TABULAR OR MOSAIC EQUIGRANULAR	AMPHIBOLE-BEARING	PC veins and wehrlite	44.29	1.09	13.39	2.17	0	3.81		18.22	11.06	3.32	0.84	98.19			6098.55									461	15.35	128	42.52		115	20.71	54.14	6.63	29.49	6.28	1.78	4.81	0.83	3.54	0.63	1.6
1998	[8052] WITT-EICKSCHEN G. (1998)	samp. MM214		EUROPEAN OROGENIC BELT - CENOZOIC/QUATERNARY / GERMANY / EIFEL / MEERFELDER MAAR	PERIDOTITE, XENOLITH		COMPOSITE MANTLE XENOLITH	PC veins and wehrlite	43.01	2.67	12.51	1.95	0	4.99	0.1	16.93	11.01	2.94	1.63	97.74			14938.6								4.49	495	25.2	233	61.8		104	12.32	42.3	6.66	33.3	8.24	2.24	5.61	0.9	4.56	0.76	2.3
1998	[8052] WITT-EICKSCHEN G. (1998)	samp. MM326		EUROPEAN OROGENIC BELT - CENOZOIC/QUATERNARY / GERMANY / EIFEL / MEERFELDER MAAR	PERIDOTITE, XENOLITH		COMPOSITE MANTLE XENOLITH	PC veins and wehrlite	44.6	1.41	12.17	1.64	0.13	4.5	0.08	17.98	10.74	3.28	1.19	97.72			7888.95								6.73	339	14.5	174	128		156	14.2	45.1	6.66	31.1	5.96	1.64	4.87	0.6	3.36	0.61	1.45
1998	[8052] WITT-EICKSCHEN G. (1998)	samp. MM307		EUROPEAN OROGENIC BELT - CENOZOIC/QUATERNARY / GERMANY / EIFEL / MEERFELDER MAAR	PERIDOTITE, XENOLITH		COMPOSITE MANTLE XENOLITH	PC veins and wehrlite	43.93	1.52	12.96	2.1	0.09	5.58	0.13	17.26	11.17	2.67	1.3	98.71			8504.4								7.81	438	18.7	172	252		247	21.9	88.9	12.1	45.6	8.03	2.02	5.77	1.03	4.65	0.78	1.59
1998	[8052] WITT-EICKSCHEN G. (1998)	samp. MM307		EUROPEAN OROGENIC BELT - CENOZOIC/QUATERNARY / GERMANY / EIFEL / MEERFELDER MAAR	PERIDOTITE, XENOLITH		COMPOSITE MANTLE XENOLITH	PC veins and wehrlite	44.74	2.36	11.95	1.48	0.02	5.39	0.09	17.22	10.34	3.22	1.36	98.17			13204.2								4.4	371	14	143	64.3		118	13	42	5.46	25.6	5.13	1.52	5.65	0.64	4.08	0.59	1.26
1998	[8052] WITT-EICKSCHEN G. (1998)	samp. MM331		EUROPEAN OROGENIC BELT - CENOZOIC/QUATERNARY / GERMANY / EIFEL / MEERFELDER MAAR	PERIDOTITE, XENOLITH		COMPOSITE MANTLE XENOLITH	PC veins and wehrlite	44.62	1.53	13.84	1.64	0	3.94	0.08	18.11	11.12	2.95	1.13	98.96			8560.35								5.16	460	15.6	127	143		142	29.1	69.4	8.56	33.6	5.78	1.52	5.14	0.57	3.34	0.56	1.78
1998	[8052] WITT-EICKSCHEN G. (1998)	samp. MM310		EUROPEAN OROGENIC BELT - CENOZOIC/QUATERNARY / GERMANY / EIFEL / MEERFELDER MAAR	PERIDOTITE, XENOLITH		COMPOSITE MANTLE XENOLITH	PC veins and wehrlite	44.29	1.09	13.39	2.17	0	3.81	0.26	18.22	11.06	3.32	0.84	98.45			6098.55								4.63	456	15.2	127	42.1		114	20.5	53.6	6.56	29.2	6.22	1.77	4.76	0.64	3.5	0.62	1.58
1998	[8052] WITT-EICKSCHEN G. (1998)	samp. MM262	165039	EUROPEAN OROGENIC BELT - CENOZOIC/QUATERNARY / GERMANY / EIFEL / MEERFELDER MAAR	PERIDOTITE, XENOLITH		COMPOSITE MANTLE XENOLITH	PC veins and wehrlite	44.61	2.21	12.46	1	0	4.71	0.01	17.49	11.2	2.83	1.33	97.85			12365								13.3	318	10.5	89.7	60.4		396	16.8	42.9	5.67	23.8	3.81	1.19	3.29	0.48	2.36	0.4	1.16
1998	[8052] WITT-EICKSCHEN G. (1998)	samp. MM333		EUROPEAN OROGENIC BELT - CENOZOIC/QUATERNARY / GERMANY / EIFEL / MEERFELDER MAAR	PERIDOTITE, XENOLITH		COMPOSITE MANTLE XENOLITH	PC veins and wehrlite	43.41	1.25	13.9	1.82	0.04	4.24	0.18	17.55	10.38	3.64	0.79	97.2			6993.75								6.35	324	15.1	84.2	44.8		118	14.5	41.6	5.86	26.4	5.76	1.37	4.48	0.62	3.03	0.63	1.4
1998	[8052] WITT-EICKSCHEN G. (1998)	samp. MM329		EUROPEAN OROGENIC BELT - CENOZOIC/QUATERNARY / GERMANY / EIFEL / MEERFELDER MAAR	PERIDOTITE, XENOLITH		COMPOSITE MANTLE XENOLITH	PC veins and wehrlite	42.44	1.24	13.88	2	0.07	4.45	0.04	18.35	10.9	2.8	1.14	97.31			6937.8								5.8	342	12.4	64.8	50		163	11	41.8	6.23	28.2	4.82	1.26	3.45	0.57	3.71	0.59	1.72
1998	[8052] WITT-EICKSCHEN G. (1998)	samp. MM313		EUROPEAN OROGENIC BELT - CENOZOIC/QUATERNARY / GERMANY / EIFEL / MEERFELDER MAAR	PERIDOTITE, XENOLITH		COMPOSITE MANTLE XENOLITH	PC veins and wehrlite	43.17	2.76	12.43	1.16	0.14	4.53	0	17.77	11.02	2.85	1.59	97.42			15442.2								5.04	374	11.1	64.7	25.7		130	8.34	27.9	4	19	4.27	1.4	3.64	0.53	3.18	0.47	1.24
1998	[8052] WITT-EICKSCHEN G. (1998)	samp. MM262	165039	EUROPEAN OROGENIC BELT - CENOZOIC/QUATERNARY / GERMANY / EIFEL / MEERFELDER MAAR	PERIDOTITE, XENOLITH		COMPOSITE MANTLE XENOLITH	PC veins and wehrlite	43.92	1.39	13.15	1.43	0.04	5.1	0	17.66	11.11	2.98	1.31	98.09			7777.05								11.1	343	12.2	62.2	89.6		309	22.1	58.9	7.92	31.8	4.9	1.15	3.7	0.51	3.19	0.53	1.34
1998	[8052] WITT-EICKSCHEN G. (1998)	samp. MM313		EUROPEAN OROGENIC BELT - CENOZOIC/QUATERNARY / GERMANY / EIFEL / MEERFELDER MAAR	PERIDOTITE, XENOLITH		COMPOSITE MANTLE XENOLITH	PC veins and wehrlite	44.79	1.56	13.22	2.07	0.03	4.03	0.13	17.86	9.9	3.08	1.38	98.05			8728.2								4.74	317	11	49.4	31.3		71.1	8.76	29.9	4.64	21.5	4.19	1.28	3.27	0.49	2.86	0.53	0.97
1996	[8229] O^CONNOR T. K. (1996)	samp. 3		EUROPEAN OROGENIC BELT - CENOZOIC/QUATERNARY / GERMANY / EIFEL / MEERFELDER MAAR	LHERZOLITE, PHLOGOPITE, XENOLITH		FOLIATED	PC veins and wehrlite	39.82	5.82	15.61	0.39	0	4.92		15.44	13.06	2.64	0.46	98.16			32562.9
1996	[8229] O^CONNOR T. K. (1996)	samp. 2		EUROPEAN OROGENIC BELT - CENOZOIC/QUATERNARY / GERMANY / EIFEL / MEERFELDER MAAR	LHERZOLITE, PHLOGOPITE, XENOLITH		FOLIATED	PC veins and wehrlite	43.48	1.31	14.33	1.84	0.05	3.91		18.29	11.08	3.34	0.73	98.36			7329.45
1987	[8638] WITT G. (1987)	samp. 3		EUROPEAN OROGENIC BELT - CENOZOIC/QUATERNARY / GERMANY / EIFEL / STEFFELNER KOPF	NOT GIVEN	PORPHYROCLASTIC	MANTLE XENOLITH	PC veins and wehrlite	43.43	1.28	13.7	2.07		3.99		17.99	10.41	3.11	1.35	97.33			7161.6
1989	[8376] WITT G. (1989)	samp. 4		EUROPEAN OROGENIC BELT - CENOZOIC/QUATERNARY / GERMANY / EIFEL	PERIDOTITE, XENOLITH		RECRYSTALLIZED, ADJACENT TO HORNBLENDITE VEINS	PC veins and wehrlite	42.2	2.98	12.92	1.45		5.6		16.29	11.47	2.71	1.58	97.2			16673.1
1989	[8376] WITT G. (1989)	samp. 5		EUROPEAN OROGENIC BELT - CENOZOIC/QUATERNARY / GERMANY / EIFEL	PERIDOTITE, XENOLITH		RECRYSTALLIZED, ADJACENT TO HORNBLENDITE VEINS	PC veins and wehrlite	42.48	2.76	12.93	1.87		5.02		16.31	11.47	2.69	1.55	97.08			15442.2
1987	[8638] WITT G. (1987)	samp. 1		EUROPEAN OROGENIC BELT - CENOZOIC/QUATERNARY / GERMANY / EIFEL / DEHNERT	PERIDOTITE, XENOLITH	PORPHYROCLASTIC	SHEARED MANTLE PERIDOTITE XENOLITH	PC veins and wehrlite	43.82	1.25	12.79	0.99		4.45		19.17	12.3	2.98	0.12	97.87			6993.75
1998	[8052] WITT-EICKSCHEN G. (1998)	samp. MM326		EUROPEAN OROGENIC BELT - CENOZOIC/QUATERNARY / GERMANY / EIFEL / MEERFELDER MAAR	MANTLE XENOLITH	PERIDOTITE, XENOLITH		PC veins and wehrlite	44.6	1.41	12.17	1.64	0.13	4.5	0.08	17.98	10.74	3.28	1.19	97.72											6.73	339	14.5	174	128		156	14.2	45.1	6.66	31.1	5.96	1.64	4.87	0.6	3.36	0.61	1.45
1998	[8052] WITT-EICKSCHEN G. (1998)	samp. MM307		EUROPEAN OROGENIC BELT - CENOZOIC/QUATERNARY / GERMANY / EIFEL / MEERFELDER MAAR	MANTLE XENOLITH	PERIDOTITE, XENOLITH		PC veins and wehrlite	44.74	2.36	11.95	1.48	0.02	5.39	0.09	17.22	10.34	3.22	1.36	98.17											4.4	371	14	143	64.3		118	13	42	5.46	25.6	5.13	1.52	5.65	0.64	4.08	0.59	1.26
1998	[8052] WITT-EICKSCHEN G. (1998)	samp. MM331		EUROPEAN OROGENIC BELT - CENOZOIC/QUATERNARY / GERMANY / EIFEL / MEERFELDER MAAR	MANTLE XENOLITH	PERIDOTITE, XENOLITH		PC veins and wehrlite	44.62	1.53	13.84	1.64	0	3.94	0.08	18.11	11.12	2.95	1.13	98.96											5.16	460	15.6	127	143		142	29.1	69.4	8.56	33.6	5.78	1.52	5.14	0.57	3.34	0.56	1.78
1998	[8052] WITT-EICKSCHEN G. (1998)	samp. MM310		EUROPEAN OROGENIC BELT - CENOZOIC/QUATERNARY / GERMANY / EIFEL / MEERFELDER MAAR	MANTLE XENOLITH	PERIDOTITE, XENOLITH		PC veins and wehrlite	44.29	1.09	13.39	2.17	0	3.81	0.26	18.22	11.06	3.32	0.84	98.45											4.63	456	15.2	127	42.1		114	20.5	53.6	6.56	29.2	6.22	1.77	4.76	0.64	3.5	0.62	1.58
1998	[8052] WITT-EICKSCHEN G. (1998)	samp. MM262	165039	EUROPEAN OROGENIC BELT - CENOZOIC/QUATERNARY / GERMANY / EIFEL / MEERFELDER MAAR	MANTLE XENOLITH	PERIDOTITE, XENOLITH		PC veins and wehrlite	44.61	2.21	12.46	1	0	4.71	0.01	17.49	11.2	2.83	1.33	97.85											13.3	318	10.5	89.7	60.4		396	16.8	42.9	5.67	23.8	3.81	1.19	3.29	0.48	2.36	0.4	1.16
2005	[13677] SHAW C. S. J. (2005)	samp. 98MF8		EUROPEAN OROGENIC BELT - CENOZOIC/QUATERNARY / GERMANY / EIFEL / MEERFELDER MAAR	WEHRLITE, XENOLITH			PC veins and wehrlite	40.74	3.13	12.84	0.24	0.08	6.36		16.22	12.02	2.64	1.87	96.14			17512.3								21.93	319	14.09	83.22	23.08	0.05	271	9.39	27.88	4.12	20.22	4.73	1.34	4.07	0.55	2.96	0.51	1.23	0.15
2005	[13677] SHAW C. S. J. (2005)	samp. 98MF8		EUROPEAN OROGENIC BELT - CENOZOIC/QUATERNARY / GERMANY / EIFEL / MEERFELDER MAAR	WEHRLITE, XENOLITH			PC veins and wehrlite	41.71	3.12	13.06	0.19	0.06	6.56		16.21	12.2	2.56	1.85	97.52			17456.4								15.93	288	12.82	76.38	19.45	0.03	237	8.43	25.89	5.49	17.36	4.21	1.31	3.62	0.54	2.65	0.46	1.04	0.13
2004	[13678] SHAW C. S. J. (2004)	samp. BAAR 29		EUROPEAN OROGENIC BELT - CENOZOIC/QUATERNARY / GERMANY / EIFEL	PLUTONIC ROCK	MICAITE		PC veins and wehrlite	41.24	3.72	12.65	0.14	0.1	8.34		15.22	10.95	2.5	1.82	96.68
2005	[13677] SHAW C. S. J. (2005)	samp. 96MF14		EUROPEAN OROGENIC BELT - CENOZOIC/QUATERNARY / GERMANY / EIFEL / MEERFELDER MAAR	LHERZOLITE, SPINEL, XENOLITH			PC veins and wehrlite	43.89	3.68	12.02	1.5	0.11	4.16		17.33	10.68	2.95	1.58	97.9			20589.6
2005	[13677] SHAW C. S. J. (2005)	samp. 98MF12		EUROPEAN OROGENIC BELT - CENOZOIC/QUATERNARY / GERMANY / EIFEL / MEERFELDER MAAR	WEHRLITE, XENOLITH			PC veins and wehrlite	41.24	3.57	14.3	0	0.05	6.59		15.88	11.65	2.36	1.92	97.56			19974.2
2004	[13678] SHAW C. S. J. (2004)	samp. BAAR 22		EUROPEAN OROGENIC BELT - CENOZOIC/QUATERNARY / GERMANY / EIFEL	PLUTONIC ROCK	MICAITE		PC veins and wehrlite	41.09	3.55	11.44	0.06	0.09	7.79		15.76	10.86	2.39	1.35	94.38
2005	[13677] SHAW C. S. J. (2005)	samp. 96MF14		EUROPEAN OROGENIC BELT - CENOZOIC/QUATERNARY / GERMANY / EIFEL / MEERFELDER MAAR	LHERZOLITE, SPINEL, XENOLITH			PC veins and wehrlite	43.93	3.41	12.79	0	0.11	4.44		18.03	11.47	2.89	1.44	98.51			19079
2005	[13677] SHAW C. S. J. (2005)	samp. 98DW05		EUROPEAN OROGENIC BELT - CENOZOIC/QUATERNARY / GERMANY / EIFEL / DREISER WEIHER	LHERZOLITE, SPINEL, XENOLITH			PC veins and wehrlite	42.92	3.29	12.46	0.16	0.1	5.92		16.66	11.25	2.9	1.62	97.28			18407.5
2005	[13677] SHAW C. S. J. (2005)	samp. 98DW05		EUROPEAN OROGENIC BELT - CENOZOIC/QUATERNARY / GERMANY / EIFEL / DREISER WEIHER	LHERZOLITE, SPINEL, XENOLITH			PC veins and wehrlite	42.04	3.22	14.41	0.16	0.11	4.39		17.22	12.8	2.77	0.83	97.95			18015.9
2005	[13677] SHAW C. S. J. (2005)	samp. 98MF05		EUROPEAN OROGENIC BELT - CENOZOIC/QUATERNARY / GERMANY / EIFEL / MEERFELDER MAAR	DUNITE, XENOLITH			PC veins and wehrlite	42.2	2.82	13.47	1.1	0.07	4.87		17.18	11.91	2.61	1.69	97.92			15777.9
2005	[13677] SHAW C. S. J. (2005)	samp. 98MF05		EUROPEAN OROGENIC BELT - CENOZOIC/QUATERNARY / GERMANY / EIFEL / MEERFELDER MAAR	DUNITE, XENOLITH			PC veins and wehrlite	42.14	2.58	13.63	1.43	0.07	4.69		17.18	11.87	2.61	1.7	97.9			14435.1
2005	[13677] SHAW C. S. J. (2005)	samp. 98MF12		EUROPEAN OROGENIC BELT - CENOZOIC/QUATERNARY / GERMANY / EIFEL / MEERFELDER MAAR	WEHRLITE, XENOLITH			PC veins and wehrlite	42.72	2.48	12.91	1.67	0.09	5.85		16.68	11.1	2.78	1.66	97.94			13875.6
2004	[13678] SHAW C. S. J. (2004)	samp. BAAR 22		EUROPEAN OROGENIC BELT - CENOZOIC/QUATERNARY / GERMANY / EIFEL	PLUTONIC ROCK	MICAITE		PC veins and wehrlite	41.25	2.44	10.95	1.35	0.09	6.89		17.26	10.81	2.71	1.22	94.97
1993	[8224] WITT-EICKSCHEN G. (1993)	samp. 1262		EUROPEAN OROGENIC BELT - CENOZOIC/QUATERNARY / GERMANY / EIFEL / DREISER WEIHER	PLUTONIC ROCK	PERIDOTITE, SPINEL		PC veins and wehrlite	44.28	1.16	12.7	1.31	0.08	4.74	0.07	17.88	11.22	3.17	1.35	97.96
1998	[8052] WITT-EICKSCHEN G. (1998)	samp. MM251		EUROPEAN OROGENIC BELT - CENOZOIC/QUATERNARY / GERMANY / EIFEL / MEERFELDER MAAR	PERIDOTITE, XENOLITH		COMPOSITE MANTLE XENOLITH	hornblendite - equivalent to PC veins	43.67	1.2	13.17	2.08	0.02	3.84	0.13	17.72	11.21	2.94	1.42	97.4			6714								8.26	511	22.3	454	231		171	44.8	93.3	9.77	35.3	7.3	1.76	6.1	0.94	5.27	0.84	2.35
1998	[8052] WITT-EICKSCHEN G. (1998)	samp. MM248	165038	EUROPEAN OROGENIC BELT - CENOZOIC/QUATERNARY / GERMANY / EIFEL / MEERFELDER MAAR	PLUTONIC ROCK	HORNBLENDITE		hornblendite - equivalent to PC veins	44.53	2.94	12.01	0.36	0	3.72	0.07	17.98	10.96	3.39	1.22	97.18											9.68	364	11.3	169	43.3		201	16.3	40.6	5.51	24.8	5.43	1.31	3.81	0.6	2.84	0.53	1.39
2003	[8634] WITT-EICKSCHEN G. (2003)	samp. MM326	165043	EUROPEAN OROGENIC BELT - CENOZOIC/QUATERNARY / GERMANY / EIFEL / MEERFELDER MAAR	PLUTONIC ROCK	HORNBLENDITE		hornblendite - equivalent to PC veins	40.89	3.67	13.78	0.01	0.06	9.59	0.02	13.78	10.81	2.8	1.75	97.16			24875								24	419	12.3	163	47		337	11.5	33.1		21.7	4.8	1.56	4.1		2.8	0.48	1.15
1998	[8052] WITT-EICKSCHEN G. (1998)	samp. MM307		EUROPEAN OROGENIC BELT - CENOZOIC/QUATERNARY / GERMANY / EIFEL / MEERFELDER MAAR	PLUTONIC ROCK	HORNBLENDITE		hornblendite - equivalent to PC veins	41.49	4	14.3	0	0.05	8.33	0	14.81	10.37	2.95	1.74	98.04											9.16	457	15.6	161	47.5		305	14.6	46.2	6.04	26.5	5.71	1.57	4.28	0.62	3.33	0.61	1.43
1998	[8052] WITT-EICKSCHEN G. (1998)	samp. MM310		EUROPEAN OROGENIC BELT - CENOZOIC/QUATERNARY / GERMANY / EIFEL / MEERFELDER MAAR	PLUTONIC ROCK	HORNBLENDITE		hornblendite - equivalent to PC veins	45.25	2.78	12.26	1.19	0.06	3.84	0.11	17.97	10.46	3.03	1.42	98.37											4.42	418	14	135	48.9		118	18.8	49.4	6.24	28.3	5.32	1.71	4.6	0.71	3.68	0.61	1.42
1998	[8052] WITT-EICKSCHEN G. (1998)	samp. MM332		EUROPEAN OROGENIC BELT - CENOZOIC/QUATERNARY / GERMANY / EIFEL / MEERFELDER MAAR	PLUTONIC ROCK	HORNBLENDITE		hornblendite - equivalent to PC veins	43.63	2.59	12.78	0.79	0.04	5.58	0	16.75	11.24	3.31	1.46	98.17											7.74	379	14.5	126	66.5		197	17.8	50.1	7.12	30.4	5.85	1.59	4.22	0.75	3.34	0.66	1.69
1998	[8052] WITT-EICKSCHEN G. (1998)	samp. MM333	165047	EUROPEAN OROGENIC BELT - CENOZOIC/QUATERNARY / GERMANY / EIFEL / MEERFELDER MAAR	PLUTONIC ROCK	HORNBLENDITE		hornblendite - equivalent to PC veins												0			21000								19.2	442	13	124	33.2		440	7.74	23.8	3.79	18.2	4.38	1.32	4.3	0.53	3.9	0.49	1.3
1998	[8052] WITT-EICKSCHEN G. (1998)	samp. MM333	165047	EUROPEAN OROGENIC BELT - CENOZOIC/QUATERNARY / GERMANY / EIFEL / MEERFELDER MAAR	PLUTONIC ROCK	HORNBLENDITE		hornblendite - equivalent to PC veins												0			21200								19.7	441	12.6	109	32.4		448	7.17	22.1	3.46	17.9	4.67	1.3	4.53	0.59	2.9	0.47	1.18
1998	[8052] WITT-EICKSCHEN G. (1998)	samp. MM262	165039	EUROPEAN OROGENIC BELT - CENOZOIC/QUATERNARY / GERMANY / EIFEL / MEERFELDER MAAR	PLUTONIC ROCK	HORNBLENDITE		hornblendite - equivalent to PC veins	41.37	3.76	14.47	0	0.06	7.43	0	15.39	11.4	2.61	1.72	98.21											4.61	413	10.7	108	43.2		121	15.3	38.5	5.19	21.3	4.65	1.36	3.64	0.55	2.89	0.5	0.95
1998	[8052] WITT-EICKSCHEN G. (1998)	samp. MM333	165047	EUROPEAN OROGENIC BELT - CENOZOIC/QUATERNARY / GERMANY / EIFEL / MEERFELDER MAAR	PLUTONIC ROCK	HORNBLENDITE		hornblendite - equivalent to PC veins												0			21900								19.5	428	12.2	106	32.9		448	7.1	22.2	3.48	18.3	5.46	1.41	4.3	0.57	2.9	0.51	1.14
1998	[8052] WITT-EICKSCHEN G. (1998)	samp. MM333	165047	EUROPEAN OROGENIC BELT - CENOZOIC/QUATERNARY / GERMANY / EIFEL / MEERFELDER MAAR	PLUTONIC ROCK	HORNBLENDITE		hornblendite - equivalent to PC veins												0			18500								17.1	479	13.6	106	40.9		411	10.5	30.9	4.7	22.6	5.29	1.58	5.55	0.63	3.5	0.58	1.46
1998	[8052] WITT-EICKSCHEN G. (1998)	samp. MM333	165047	EUROPEAN OROGENIC BELT - CENOZOIC/QUATERNARY / GERMANY / EIFEL / MEERFELDER MAAR	PLUTONIC ROCK	HORNBLENDITE		hornblendite - equivalent to PC veins	41.1	3.65	13.75	0.08	0.13	8.46	0.01	14.05	11.62	2.62	2.05	97.52											19.5	428	12.2	106	32.9		448	7.1	22.2	3.48	18.3	5.46	1.41	4.3	0.57	2.9	0.51	1.14
1998	[8052] WITT-EICKSCHEN G. (1998)	samp. MM333	165047	EUROPEAN OROGENIC BELT - CENOZOIC/QUATERNARY / GERMANY / EIFEL / MEERFELDER MAAR	PLUTONIC ROCK	HORNBLENDITE		hornblendite - equivalent to PC veins												0			21400								19.6	456	12.9	104	35.1		454	8.56	25.2	3.9	19.5	4.66	1.53	5.09	0.67	3.94	0.56	1.46
2003	[8634] WITT-EICKSCHEN G. (2003)	samp. MM333	165047	EUROPEAN OROGENIC BELT - CENOZOIC/QUATERNARY / GERMANY / EIFEL / MEERFELDER MAAR	PLUTONIC ROCK	HORNBLENDITE		hornblendite - equivalent to PC veins	41.1	3.65	13.75	0.08	0.13	8.46	0.06	14.05	11.62	2.62	2.05	97.57			25378								29	439	12.9	103	35		389	9.1	27.4		20.3	4.9	1.54	4.1		3	0.47	1.16
1998	[8052] WITT-EICKSCHEN G. (1998)	samp. MM313	165042	EUROPEAN OROGENIC BELT - CENOZOIC/QUATERNARY / GERMANY / EIFEL / MEERFELDER MAAR	PLUTONIC ROCK	HORNBLENDITE		hornblendite - equivalent to PC veins	42.29	3.81	14.66	0	0.12	7.04	0	15.43	10.58	2.6	2.07	98.6											15.2	418	12.3	86.2	24.1		364	7.34	24.2	3.88	18.6	4.6	1.44	4.55	0.7	3.28	0.56	1.41
1998	[8052] WITT-EICKSCHEN G. (1998)	samp. MM331		EUROPEAN OROGENIC BELT - CENOZOIC/QUATERNARY / GERMANY / EIFEL / MEERFELDER MAAR	PLUTONIC ROCK	HORNBLENDITE		hornblendite - equivalent to PC veins	42.9	2.27	13.35	1.71	0.05	3.82	0.18	17.25	10.61	2.75	1.48	96.37											4.91	474	13.6	82.4	87.6		147	20	58	8.28	35.3	6.55	1.74	5.72	0.8	4	0.65	1.55
1998	[8052] WITT-EICKSCHEN G. (1998)	samp. MM329		EUROPEAN OROGENIC BELT - CENOZOIC/QUATERNARY / GERMANY / EIFEL / MEERFELDER MAAR	PLUTONIC ROCK	HORNBLENDITE		hornblendite - equivalent to PC veins	42.86	2.97	13.6	0.33	0.01	5.37	0.24	17.44	11.06	2.66	1.57	98.11											7.34	339	10.8	73.4	31.9		133	8.73	30.28	4.39	20.6	4.51	1.27	3.74	0.55	2.68	0.5	1.11
1993	[8224] WITT-EICKSCHEN G. (1993)	samp. 1262V		EUROPEAN OROGENIC BELT - CENOZOIC/QUATERNARY / GERMANY / EIFEL / DREISER WEIHER	PLUTONIC ROCK	HORNBLENDITE		hornblendite - equivalent to PC veins	41.37	3.76	14.47	0	0.06	7.43	0	15.39	11.04	2.61	1.72	97.85
1993	[8224] WITT-EICKSCHEN G. (1993)	samp. 1251V	166950	EUROPEAN OROGENIC BELT - CENOZOIC/QUATERNARY / GERMANY / EIFEL / DREISER WEIHER	PLUTONIC ROCK	HORNBLENDITE		hornblendite - equivalent to PC veins	43.93	1.75	13	0.75	0.01	4.39	0.01	18.14	11.18	2.93	1.36	97.45
1998	[8052] WITT-EICKSCHEN G. (1998)	samp. MM251	165037	EUROPEAN OROGENIC BELT - CENOZOIC/QUATERNARY / GERMANY / EIFEL / MEERFELDER MAAR	PLUTONIC ROCK	HORNBLENDITE		hornblendite - equivalent to PC veins	43.93	1.75	13	0.75	0.01	4.39	0.01	18.14	11.18	2.93	1.36	97.45											9.04	492	21.8	583	231		161	44.8	87.8	9.94	37	7.33	1.98	5.61	0.98	4.84	0.91	2.45
2003	[8634] WITT-EICKSCHEN G. (2003)	samp. MM251	165037	EUROPEAN OROGENIC BELT - CENOZOIC/QUATERNARY / GERMANY / EIFEL / MEERFELDER MAAR	PLUTONIC ROCK	HORNBLENDITE		hornblendite - equivalent to PC veins	43.93	1.75	13	0.75	0.01	4.39	0.01	18.14	11.18	2.93	1.36	97.45			9925								15.3	605	22.9	500	231		230	41.3	84.8		36.6	7.6	2.17	6.3		4.8	0.85	2.14
1998	[8052] WITT-EICKSCHEN G. (1998)	samp. MM326	165043	EUROPEAN OROGENIC BELT - CENOZOIC/QUATERNARY / GERMANY / EIFEL / MEERFELDER MAAR	PLUTONIC ROCK	HORNBLENDITE		hornblendite - equivalent to PC veins	40.89	3.67	13.78	0.01	0.06	9.59	0.06	13.78	10.81	2.8	1.75	97.2											13.5	445	12.6	213	48.9		335	13.6	38.9	4.9	22	4.62	1.28	4.5	0.62	3.12	0.51	1.16
1998	[8052] WITT-EICKSCHEN G. (1998)	samp. MM214	165036	EUROPEAN OROGENIC BELT - CENOZOIC/QUATERNARY / GERMANY / EIFEL / MEERFELDER MAAR	PLUTONIC ROCK	HORNBLENDITE		hornblendite - equivalent to PC veins	42.23	3.44	12.87	0.38	0.01	6.41	0.1	16.17	11.68	2.56	1.66	97.51											8.19	480	22.6	202	60.1		212	11.84	38.2	5.75	29.2	6.87	2.26	5.95	0.94	4.75	0.74	1.88
2003	[8634] WITT-EICKSCHEN G. (2003)	samp. MM248	165038	EUROPEAN OROGENIC BELT - CENOZOIC/QUATERNARY / GERMANY / EIFEL / MEERFELDER MAAR	PLUTONIC ROCK	HORNBLENDITE		hornblendite - equivalent to PC veins	44.53	2.9	12.01	0.36	0	3.72	0.1	17.98	10.96	3.39	1.22	97.17			20562								10.3	512	14.9	182	49		182	17.9	47		26.7	5.6	1.83	4.7		3.3	0.57	1.36
	new data	vein						CAP vein	42.4422	1.08424	12.1406			3.83628		19.0492	10.8186	3.55703	1.24196	94.1701		51.6036	4640.06	6066.32	350.486	10794.1		34.0554	726.296		11.4432	485.198	19.138	92.5683	141.184		399.852	24.6229	74.8794	10.5393	44.6018	8.89883	2.31028	7.45381	0.90556	4.01886	0.744482	1.91945	0.166569
	new data	vein						CAP vein	44.0304	0.994164	12.7454			3.81699		17.7659	10.8186	3.18771	1.24317	94.6023		51.8094	4591.32	5562.35	350.157	10710.7		33.2259	731.646		8.4816	481.693	19.8985	89.3747	152.286		281.851	23.4763	72.1535	10.3989	44.3044	9.55726	2.51859	6.66063	0.913778	4.46326	0.831361	2.01519	0.22972
	new data	vein						CAP vein	46.3677	0.815681	13.0723			4.07943		15.7035	10.2254	2.71865	1.1721	94.1547		51.8449	4543.72	4563.74	341.129	10095.3		33.6645	705.143		8.60854	475.782	19.4194	88.2224	151.184		231.79	22.149	70.5761	9.94585	43.5168	8.67222	2.70384	7.12215	0.806884	4.62752	0.768529	1.9397	0.277796
	new data	vein						CAP vein	43.9019	1.0392	12.7208			3.81956		17.7195	10.7487	3.14728	1.29135	94.3883		50.5842	4659.89	5814.33	346.607	10593.6		34.6666	708.606		8.55995	472.371	19.5015	85.6973	151.527		212.458	22.1836	69.5023	10.2144	44.7262	9.41547	2.59177	6.87687	0.849977	4.72279	0.715103	1.74212	0.23445
	new data	vein						CAP vein	43.9512	0.942454	12.7038			3.92248		17.6051	10.8032	3.30902	1.25401	94.4913		50.1967	4610.37	5273.03	341.24	10698.1		33.3901	735.246		8.36221	471.551	18.3324	85.674	131.098		262.553	24.2939	73.1816	10.1372	43.4129	7.75078	2.32381	6.74157	0.768196	3.92999	0.706333	1.7458	0.209336
	new data	vein						CAP vein	45.2718	0.850711	13.1082			4.10902		17.446	10.4702	3.06236	1.22389	95.5422		51.3628	4659.31	4759.73	343.579	10312.5		34.3863	723.511		9.58758	494.336	18.9193	83.9564	124.679		322.776	25.6196	76.023	10.1466	44.2596	8.76061	2.39338	7.56258	0.835838	4.32307	0.702964	2.03224	0.228932
	new data	vein						CAP vein	44.5933	0.925773	12.8928			3.75909		17.635	10.6815	3.27398	1.26606	95.0274		45.7384	4425.98	5179.7	325.948	10168.2		32.2059	669.82		8.046	436.881	16.4621	63.2357	97.5224		241.868	23.4222	68.8856	9.34397	40.0549	7.91011	1.95546	5.59986	0.721333	3.53215	0.602503	1.61574	0.169568
[truncated: 7 more columns]

## Sheet: phlogopite
Year	CITATION	SAMPLE NAME	UNIQUE_ID	LOCATION	LOCATION COMMENT	ROCK TYPE	ROCK NAME	Type 1a	SAMPLE COMMENT	GEOLOGICAL AGE	SiO2	TiO2	Al2O3	Cr2O3	FeO	CaO	MgO	MnO	BaO	NiO	K2O	Na2O	F	Cl	Total
2018	[22049] SHAW C. S. J. (2018)	samp. 166C		EUROPEAN OROGENIC BELT - CENOZOIC/QUATERNARY / GERMANY / EIFEL / ROCKESKYLLERKOPF VOLCANIC COMPLEX		MANTLE XENOLITH	HARZBURGITE, AMPHIBOLE-PHLOGOPITE, XENOLITH	Type			38.22	0.17	16.48	2	3.66	0.02	22.55	0.02		0.17	8.54	1.17			93
2018	[22049] SHAW C. S. J. (2018)	samp. 166C		EUROPEAN OROGENIC BELT - CENOZOIC/QUATERNARY / GERMANY / EIFEL / ROCKESKYLLERKOPF VOLCANIC COMPLEX		MANTLE XENOLITH	HARZBURGITE, AMPHIBOLE-PHLOGOPITE, XENOLITH	Type 1a			38.88	0.17	16.26	1.72	3.64	0.05	23.03	0.02		0.18	8.59	1.24			93.78
2018	[22049] SHAW C. S. J. (2018)	samp. 28A		EUROPEAN OROGENIC BELT - CENOZOIC/QUATERNARY / GERMANY / EIFEL / ROCKESKYLLERKOPF VOLCANIC COMPLEX		MANTLE XENOLITH	LHERZOLITE, AMPHIBOLE-PHLOGOPITE, XENOLITH	Type 1a			38.92	0.37	16.22	1.68	3.43	0.14	22.97	0.05			9.81	0.55			94.14
1996	[8229] O^CONNOR T. K. (1996)	samp. 6		EUROPEAN OROGENIC BELT - CENOZOIC/QUATERNARY / GERMANY / EIFEL / MEERFELDER MAAR		MANTLE XENOLITH	LHERZOLITE, AMPHIBOLE-PHLOGOPITE-SPINEL, XENOLITH	Type 1a		QUATERNARY	39.6	0.72	17.1	1.33	4.39	0	23.02	0	0.5		9.01	1.1	0.16	0.09	97.02
2018	[22049] SHAW C. S. J. (2018)	samp. 28A		EUROPEAN OROGENIC BELT - CENOZOIC/QUATERNARY / GERMANY / EIFEL / ROCKESKYLLERKOPF VOLCANIC COMPLEX		MANTLE XENOLITH	LHERZOLITE, AMPHIBOLE-PHLOGOPITE, XENOLITH	Type 1a			40.14	0.77	14.59	1.37	3.74	0.16	23.86	0.04			8.81	0.91			94.39
1996	[8229] O^CONNOR T. K. (1996)	samp. 8		EUROPEAN OROGENIC BELT - CENOZOIC/QUATERNARY / GERMANY / EIFEL / MEERFELDER MAAR		MANTLE XENOLITH	LHERZOLITE, AMPHIBOLE-PHLOGOPITE, XENOLITH	Type 1a		QUATERNARY	39.58	0.91	17.09	1.96	3.44	0.01	22.96	0	0.76		8.72	1.06	0.11	0.08	96.68
1995	[7805] ZINNGREBE E. (1995)	samp. G5		EUROPEAN OROGENIC BELT - CENOZOIC/QUATERNARY / GERMANY / EIFEL / GEESER MAAR	QUARRY SE OF GEES	MANTLE XENOLITH	WEHRLITE, XENOLITH	PC veins and wehrlite			38.47	2.6	16.35	1.51	6.62	0.04	21.59	0.1		0.19	7.26	0.25		0.02	95
2018	[22049] SHAW C. S. J. (2018)	samp. 115C		EUROPEAN OROGENIC BELT - CENOZOIC/QUATERNARY / GERMANY / EIFEL / ROCKESKYLLERKOPF VOLCANIC COMPLEX		MANTLE XENOLITH	DUNITE, PHLOGOPITE, XENOLITH	PC veins and wehrlite			38.98	2.69	15.04	0.56	3.98	0.02	22.04	0.04			8.87	0.99			93.21
2005	[13677] SHAW C. S. J. (2005)	samp. 98DW05		EUROPEAN OROGENIC BELT - CENOZOIC/QUATERNARY / GERMANY / EIFEL / DREISER WEIHER		MANTLE XENOLITH	LHERZOLITE, SPINEL, XENOLITH	PC veins and wehrlite			39.74	2.75	15.99	1.31	4.73	0.06	21.99	0.03	0.27		8.85	0.97			96.69
2018	[22049] SHAW C. S. J. (2018)	samp. 207B		EUROPEAN OROGENIC BELT - CENOZOIC/QUATERNARY / GERMANY / EIFEL / ROCKESKYLLERKOPF VOLCANIC COMPLEX		MANTLE XENOLITH	WEHRLITE, PHLOGOPITE-AMPHIBOLE, XENOLITH	PC veins and wehrlite			38.44	2.79	15.7	1.71	4.24	0.04	21.35	0.04		0.18	9.88	0.34			94.71
2005	[13677] SHAW C. S. J. (2005)	samp. 98KY06		EUROPEAN OROGENIC BELT - CENOZOIC/QUATERNARY / GERMANY / EIFEL / ROCKESKYLLERKOPF VOLCANIC COMPLEX		MANTLE XENOLITH	DUNITE, XENOLITH	PC veins and wehrlite			37.94	2.8	16.94	1.27	5.45	0.03	21.36	0	0.23		9.72	0.47			96.21
2018	[22049] SHAW C. S. J. (2018)	samp. 45A		EUROPEAN OROGENIC BELT - CENOZOIC/QUATERNARY / GERMANY / EIFEL / ROCKESKYLLERKOPF VOLCANIC COMPLEX		MANTLE XENOLITH	DUNITE, PHLOGOPITE-AMPHIBOLE, XENOLITH	PC veins and wehrlite			37.51	2.9	15.73	0.83	4.67	0.18	21.97	0.07			8.35	0.92			93.13
2018	[22049] SHAW C. S. J. (2018)	samp. 30A		EUROPEAN OROGENIC BELT - CENOZOIC/QUATERNARY / GERMANY / EIFEL / ROCKESKYLLERKOPF VOLCANIC COMPLEX		MANTLE XENOLITH	WEHRLITE, PHLOGOPITE-AMPHIBOLE, XENOLITH	PC veins and wehrlite	VEINED		37.83	3.15	17.06	1.24	4.47	0.15	20.45	0.05		0.18	8.61	0.79			93.98
1996	[8229] O^CONNOR T. K. (1996)	samp. 7		EUROPEAN OROGENIC BELT - CENOZOIC/QUATERNARY / GERMANY / EIFEL / MEERFELDER MAAR		MANTLE XENOLITH	LHERZOLITE, AMPHIBOLE-PHLOGOPITE, XENOLITH	PC veins and wehrlite		QUATERNARY	38.34	3.24	16.08	1.24	5.89	0.02	21.38	0.06	0.3		9.19	0.85	0.22	0.05	96.86
2005	[13677] SHAW C. S. J. (2005)	samp. 98KY06		EUROPEAN OROGENIC BELT - CENOZOIC/QUATERNARY / GERMANY / EIFEL / ROCKESKYLLERKOPF VOLCANIC COMPLEX		MANTLE XENOLITH	DUNITE, XENOLITH	PC veins and wehrlite			37.7	3.27	16.24	0.38	6.99	0.05	20.7	0.06	0.34		9.74	0.46			95.93
2018	[22049] SHAW C. S. J. (2018)	samp. 12B		EUROPEAN OROGENIC BELT - CENOZOIC/QUATERNARY / GERMANY / EIFEL / ROCKESKYLLERKOPF VOLCANIC COMPLEX		MANTLE XENOLITH	WEHRLITE, PHLOGOPITE, XENOLITH	PC veins and wehrlite	VEINED		37.4	3.34	16.15	0.66	5.49	0.12	20.83	0.06		0.19	9.68	0.33			94.25
2018	[22049] SHAW C. S. J. (2018)	samp. 43D		EUROPEAN OROGENIC BELT - CENOZOIC/QUATERNARY / GERMANY / EIFEL / ROCKESKYLLERKOPF VOLCANIC COMPLEX		MANTLE XENOLITH	WEHRLITE, PHLOGOPITE, XENOLITH	PC veins and wehrlite			38.4	3.44	17.55	0.82	5.78	0.35	23.28	0.03		0.18	7.79	0.32			97.94
2005	[13677] SHAW C. S. J. (2005)	samp. 98KY02A		EUROPEAN OROGENIC BELT - CENOZOIC/QUATERNARY / GERMANY / EIFEL / ROCKESKYLLERKOPF VOLCANIC COMPLEX		MANTLE XENOLITH	WEHRLITE, XENOLITH	PC veins and wehrlite			37.52	3.53	16.17	0.97	5.62	0.01	21.01	0	0.28		9.82	0.28			95.21
2005	[13677] SHAW C. S. J. (2005)	samp. 98KY02A		EUROPEAN OROGENIC BELT - CENOZOIC/QUATERNARY / GERMANY / EIFEL / ROCKESKYLLERKOPF VOLCANIC COMPLEX		MANTLE XENOLITH	WEHRLITE, XENOLITH	PC veins and wehrlite			37.56	3.62	15.95	0.69	6.37	0.03	20.57	0	0.37		9.64	0.47			95.27
2018	[22049] SHAW C. S. J. (2018)	samp. 12D		EUROPEAN OROGENIC BELT - CENOZOIC/QUATERNARY / GERMANY / EIFEL / ROCKESKYLLERKOPF VOLCANIC COMPLEX		MANTLE XENOLITH	WEHRLITE, PHLOGOPITE, XENOLITH	PC veins and wehrlite	VEINED		37.54	3.81	15.86	0.37	7.61	0.04	19.72	0.07		0.15	9.48	0.56			95.21
2018	[22049] SHAW C. S. J. (2018)	samp. 12D		EUROPEAN OROGENIC BELT - CENOZOIC/QUATERNARY / GERMANY / EIFEL / ROCKESKYLLERKOPF VOLCANIC COMPLEX		MANTLE XENOLITH	WEHRLITE, PHLOGOPITE, XENOLITH	PC veins and wehrlite	VEINED		37.24	3.82	16.05	0.6	7.61	0.07	19.85	0.04		0.15	9.45	0.54			95.42
1991	[8623] LLOYD F. E. (1991)	samp. FL13	150374	EUROPEAN OROGENIC BELT - CENOZOIC/QUATERNARY / GERMANY / EIFEL / GEESER MAAR	QUARRY SE OF GEES	MANTLE XENOLITH	WEHRLITE, MICA, XENOLITH	PC veins and wehrlite		QUATERNARY	38.11	3.85	15.92	0.63	8.41	0	19.47	0.07	0.64		10.28	0.26			97.64
2005	[13677] SHAW C. S. J. (2005)	samp. 98MF12		EUROPEAN OROGENIC BELT - CENOZOIC/QUATERNARY / GERMANY / EIFEL / MEERFELDER MAAR		MANTLE XENOLITH	WEHRLITE, XENOLITH	PC veins and wehrlite			38.4	3.86	16	0.96	5.87	0.03	20.3	0.08	0.35		8.96	0.83			95.64
2005	[13677] SHAW C. S. J. (2005)	samp. 97G03		EUROPEAN OROGENIC BELT - CENOZOIC/QUATERNARY / GERMANY / EIFEL / GEESER MAAR	QUARRY SE OF GEES	MANTLE XENOLITH	WEHRLITE, XENOLITH	PC veins and wehrlite			38.22	3.91	16.51	0.51	5.79	0	20.62	0.06	0.21		9.62	0.4			95.85
1989	[8170] EDGAR A. D. (1989)	samp. FL13	150374	EUROPEAN OROGENIC BELT - CENOZOIC/QUATERNARY / GERMANY / EIFEL / GEESER MAAR	QUARRY SE OF GEES	MANTLE XENOLITH	WEHRLITE, PHLOGOPITE, XENOLITH	PC veins and wehrlite		QUATERNARY	37.63	3.93	15.89	0.68	8.06		19.47	0.14			10.02	0.32			96.14
2018	[22049] SHAW C. S. J. (2018)	samp. 12D		EUROPEAN OROGENIC BELT - CENOZOIC/QUATERNARY / GERMANY / EIFEL / ROCKESKYLLERKOPF VOLCANIC COMPLEX		MANTLE XENOLITH	WEHRLITE, PHLOGOPITE, XENOLITH	PC veins and wehrlite	VEINED		37.59	3.99	15.9	0.38	7.91	0.1	19.56	0.04		0.1	9.54	0.52			95.63
2005	[13677] SHAW C. S. J. (2005)	samp. 98MF12		EUROPEAN OROGENIC BELT - CENOZOIC/QUATERNARY / GERMANY / EIFEL / MEERFELDER MAAR		MANTLE XENOLITH	WEHRLITE, XENOLITH	PC veins and wehrlite			38.76	4.01	16.07	0.41	6.14	0	20.63	0.11	0.39		9.02	0.89			96.43
2005	[13677] SHAW C. S. J. (2005)	samp. 98DW05		EUROPEAN OROGENIC BELT - CENOZOIC/QUATERNARY / GERMANY / EIFEL / DREISER WEIHER		MANTLE XENOLITH	LHERZOLITE, SPINEL, XENOLITH	PC veins and wehrlite			38.7	4.04	15.32	0.44	5.75	0	20.91	0.04	0.33		9.03	0.91			95.47
1991	[8623] LLOYD F. E. (1991)	samp. FL251		EUROPEAN OROGENIC BELT - CENOZOIC/QUATERNARY / GERMANY / EIFEL / GEESER MAAR	QUARRY SE OF GEES	MANTLE XENOLITH	WEHRLITE, MICA, XENOLITH	PC veins and wehrlite		QUATERNARY	37.15	4.05	15.86	0.72	7.33	0.26	19.66	0.07			10.16	0.33			95.59
2005	[13677] SHAW C. S. J. (2005)	samp. 97G03		EUROPEAN OROGENIC BELT - CENOZOIC/QUATERNARY / GERMANY / EIFEL / GEESER MAAR	QUARRY SE OF GEES	MANTLE XENOLITH	WEHRLITE, XENOLITH	PC veins and wehrlite			37.49	4.05	16.35	0.13	6.81	0.03	19.89	0.1	0.32		9.66	0.43			95.26
1995	[7805] ZINNGREBE E. (1995)	samp. G39		EUROPEAN OROGENIC BELT - CENOZOIC/QUATERNARY / GERMANY / EIFEL / GEESER MAAR	QUARRY SE OF GEES	MANTLE XENOLITH	WEHRLITE, XENOLITH	PC veins and wehrlite			38.32	4.07	15.78	2.21	5.53	0.06	20.56	0.03		0.24	7.32	0.35		0.02	94.49
2018	[22049] SHAW C. S. J. (2018)	samp. 168B		EUROPEAN OROGENIC BELT - CENOZOIC/QUATERNARY / GERMANY / EIFEL / ROCKESKYLLERKOPF VOLCANIC COMPLEX		MANTLE XENOLITH	WEHRLITE, PHLOGOPITE-AMPHIBOLE, XENOLITH	PC veins and wehrlite	VEINED		37.75	4.09	15.95	1.17	4.84	0.14	20.63	0.05		0.19	8.55	1			94.36
1991	[8623] LLOYD F. E. (1991)	samp. FL7		EUROPEAN OROGENIC BELT - CENOZOIC/QUATERNARY / GERMANY / EIFEL / GEESER MAAR	QUARRY SE OF GEES	MANTLE XENOLITH	LHERZOLITE, XENOLITH	PC veins and wehrlite	CLINOPYROXENE-POOR	QUATERNARY	39.38	4.12	13.26	2.65	3.92	0.44	21.69	0			10.69	0.24			96.39
2005	[13677] SHAW C. S. J. (2005)	samp. 97KY07		EUROPEAN OROGENIC BELT - CENOZOIC/QUATERNARY / GERMANY / EIFEL / ROCKESKYLLERKOPF VOLCANIC COMPLEX		MANTLE XENOLITH	WEHRLITE, XENOLITH	PC veins and wehrlite			37.49	4.14	15.76	1.01	7.43	0.02	19.81	0.08	0.3		9.48	0.31			95.83
2005	[13677] SHAW C. S. J. (2005)	samp. 98KY06		EUROPEAN OROGENIC BELT - CENOZOIC/QUATERNARY / GERMANY / EIFEL / ROCKESKYLLERKOPF VOLCANIC COMPLEX		MANTLE XENOLITH	DUNITE, XENOLITH	PC veins and wehrlite			37.67	4.15	16.17	0.18	7.88	0.02	19.6	0.09	0.43		9.5	0.52			96.21
2005	[13677] SHAW C. S. J. (2005)	samp. 98BA02		EUROPEAN OROGENIC BELT - CENOZOIC/QUATERNARY / GERMANY / EIFEL	BAARLEY	MANTLE XENOLITH	WEHRLITE, XENOLITH	PC veins and wehrlite			37.38	4.16	16.54	0.69	6.89	0	19.91	0.05	0.43		9.63	0.37			96.05
2005	[13677] SHAW C. S. J. (2005)	samp. 98BA02		EUROPEAN OROGENIC BELT - CENOZOIC/QUATERNARY / GERMANY / EIFEL	BAARLEY	MANTLE XENOLITH	WEHRLITE, XENOLITH	PC veins and wehrlite			37.53	4.22	16.21	0.11	7.18	0.02	20.03	0.06	0.41		9.43	0.39			95.59
2005	[13677] SHAW C. S. J. (2005)	samp. 97G02		EUROPEAN OROGENIC BELT - CENOZOIC/QUATERNARY / GERMANY / EIFEL / GEESER MAAR	QUARRY SE OF GEES	MANTLE XENOLITH	WEHRLITE, XENOLITH	PC veins and wehrlite			37.68	4.25	16.28	0.55	6.17	0.02	20.12	0.09	0.42		9.82	0.29			95.69
2005	[13677] SHAW C. S. J. (2005)	samp. 97G02		EUROPEAN OROGENIC BELT - CENOZOIC/QUATERNARY / GERMANY / EIFEL / GEESER MAAR	QUARRY SE OF GEES	MANTLE XENOLITH	WEHRLITE, XENOLITH	PC veins and wehrlite			37.77	4.27	16.08	0.07	7.09	0.03	19.19	0.11	0.38		9.89	0.34			95.22
2005	[13677] SHAW C. S. J. (2005)	samp. 97KY07		EUROPEAN OROGENIC BELT - CENOZOIC/QUATERNARY / GERMANY / EIFEL / ROCKESKYLLERKOPF VOLCANIC COMPLEX		MANTLE XENOLITH	WEHRLITE, XENOLITH	PC veins and wehrlite			37.75	4.29	16.14	0.06	7.32	0.02	19.94	0.03	0.45		9.69	0.42			96.11
2018	[22049] SHAW C. S. J. (2018)	samp. 45A		EUROPEAN OROGENIC BELT - CENOZOIC/QUATERNARY / GERMANY / EIFEL / ROCKESKYLLERKOPF VOLCANIC COMPLEX		MANTLE XENOLITH	DUNITE, PHLOGOPITE-AMPHIBOLE, XENOLITH	PC veins and wehrlite			37.47	4.3	16.3	1.24	4.19	0.13	20.81	0.03		0.02	9.34	0.7			94.53
2005	[13677] SHAW C. S. J. (2005)	samp. 98DW05		EUROPEAN OROGENIC BELT - CENOZOIC/QUATERNARY / GERMANY / EIFEL / DREISER WEIHER		MANTLE XENOLITH	LHERZOLITE, SPINEL, XENOLITH	PC veins and wehrlite			38.69	4.36	15.3	0.06	6.5	0	20.78	0.03	0.36		9.21	0.89			96.18
2005	[13677] SHAW C. S. J. (2005)	samp. 97G02		EUROPEAN OROGENIC BELT - CENOZOIC/QUATERNARY / GERMANY / EIFEL / GEESER MAAR	QUARRY SE OF GEES	MANTLE XENOLITH	WEHRLITE, XENOLITH	PC veins and wehrlite			37.71	4.41	16.27	0	6.94	0.04	20.18	0.11	0.41		9.7	0.3			96.07
2005	[13677] SHAW C. S. J. (2005)	samp. 96MF14		EUROPEAN OROGENIC BELT - CENOZOIC/QUATERNARY / GERMANY / EIFEL / MEERFELDER MAAR		MANTLE XENOLITH	LHERZOLITE, SPINEL, XENOLITH	PC veins and wehrlite			38.56	4.43	15.75	2.05	4.08	0	21.24	0	0.45		8.9	0.99			96.45
2018	[22049] SHAW C. S. J. (2018)	samp. 212D		EUROPEAN OROGENIC BELT - CENOZOIC/QUATERNARY / GERMANY / EIFEL / ROCKESKYLLERKOPF VOLCANIC COMPLEX		MANTLE XENOLITH	WEHRLITE, PHLOGOPITE, XENOLITH	PC veins and wehrlite			37.8	4.45	15.94	0.61	6.78	0.13	19.84	0.06		0.12	9.11	0.29			95.13
2005	[13677] SHAW C. S. J. (2005)	samp. 98MF12		EUROPEAN OROGENIC BELT - CENOZOIC/QUATERNARY / GERMANY / EIFEL / MEERFELDER MAAR		MANTLE XENOLITH	WEHRLITE, XENOLITH	PC veins and wehrlite			38.01	4.45	16.51	0.03	7.43	0.1	19.5	0.12	0.4		8.58	0.76			95.89
1968	[9291] AOKI K.-I. (1968)	samp. E-5		EUROPEAN OROGENIC BELT - CENOZOIC/QUATERNARY / GERMANY / EIFEL / DREISER WEIHER		MANTLE XENOLITH	WEHRLITE, PHLOGOPITE, XENOLITH	PC veins and wehrlite		CENOZOIC	38.14	4.55	15.84	0.5	6.38	0.15	20.55	0.08			8.04	1.02			95.25
1996	[8229] O^CONNOR T. K. (1996)	samp. 5		EUROPEAN OROGENIC BELT - CENOZOIC/QUATERNARY / GERMANY / EIFEL / MEERFELDER MAAR		MANTLE XENOLITH	LHERZOLITE, PHLOGOPITE, XENOLITH	PC veins and wehrlite	FOLIATED	QUATERNARY	38.16	5.08	15.86	2.32	3.99	0.05	20.53	0.07	0.49		9.86	0.3	0.28	0	96.99
1991	[8623] LLOYD F. E. (1991)	samp. FL14	150381	EUROPEAN OROGENIC BELT - CENOZOIC/QUATERNARY / GERMANY / EIFEL / GEESER MAAR	QUARRY SE OF GEES	MANTLE XENOLITH	WEHRLITE, MICA, XENOLITH	PC veins and wehrlite		QUATERNARY	38.46	5.31	14.58	0.82	7.03	0	19.23	0.09	0.96		9.84	0.49			96.81
1989	[8170] EDGAR A. D. (1989)	samp. FL13	150374	EUROPEAN OROGENIC BELT - CENOZOIC/QUATERNARY / GERMANY / EIFEL / GEESER MAAR	QUARRY SE OF GEES	MANTLE XENOLITH	WEHRLITE, PHLOGOPITE, XENOLITH	PC veins and wehrlite		QUATERNARY	37.84	5.36	14.53	0.59	6.92		19.47	0.04			9.73	0.74			95.22
1991	[8623] LLOYD F. E. (1991)	samp. FL14	150381	EUROPEAN OROGENIC BELT - CENOZOIC/QUATERNARY / GERMANY / EIFEL / GEESER MAAR	QUARRY SE OF GEES	MANTLE XENOLITH	WEHRLITE, MICA, XENOLITH	PC veins and wehrlite		QUATERNARY	38.39	5.54	14.06	2.21	6.45	0	19.42	0.08	0.9		9.96	0.4			97.41
2005	[13677] SHAW C. S. J. (2005)	samp. 96MF14		EUROPEAN OROGENIC BELT - CENOZOIC/QUATERNARY / GERMANY / EIFEL / MEERFELDER MAAR		MANTLE XENOLITH	LHERZOLITE, SPINEL, XENOLITH	PC veins and wehrlite			38.29	5.84	16.78	0.19	4.25	0.06	21.14	0	0.48		9.04	0.9			96.97
