# Supplementary material for: Carbonatite metasomatism overprinted by silicate melt metasomatism in the mantle beneath the West Eifel volcanic field
Source: Copernicus journal article supplement (doi:10.5194/ejm-37-365-2025), 2025-06-30
Supplement: Supplementary file 1 [file ejm-37-365-2025-supplement.zip]

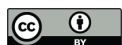

*Supplement of*

## **Carbonatite metasomatism overprinted by silicate melt metasomatism in the mantle beneath the West Eifel volcanic field**

**Beatrice E. Bromley et al.**

*Correspondence to:* Cliff S. J. Shaw (cshaw@unb.ca)

- [ejm-37-365-2025-supplement-title-page.pdf](#)
- [Table\\_S1\\_data.xlsx](#)

The copyright of individual parts of the supplement might differ from the article licence.
